# Supplementary material for: Synthesis of Bioactive 2-(Arylamino)thiazolo[5,4-f]-quinazolin-9-ones via the Hügershoff Reaction or Cu- Catalyzed Intramolecular C-S Bond Formation
Source: PubMed Central journal article supplement (PMC6272913; doi:10.3390/molecules21060794), 2016-06-18

# Supplementary Materials: Synthesis of Bioactive 2-(Arylamino)thiazolo[5,4-f]quinazolin-9-ones via Hügershoff Reaction or Cu Catalyzed Intramolecular C-S Bond Formation

Damien Hédou, Carole Dubouilh-Benard, Nadège Loaïc, Laurent Meijer, Corinne Fruit and Thierry Besson

$^1\text{H}$  and  $^{13}\text{C}$ -NMR Spectra of Compounds 2-6, 7a-l, 8a-m, 10a and 10l, 11-13, 14a-f, 15, 16 and 17a-d

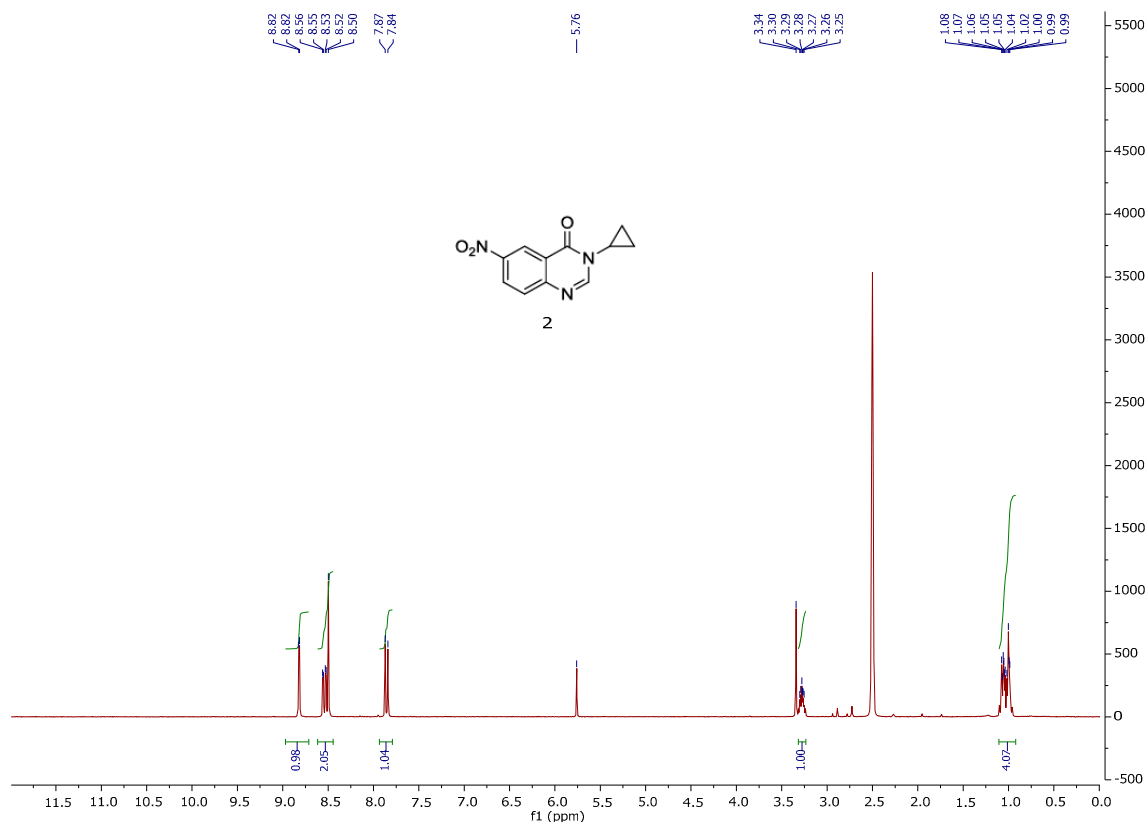

Figure S1.  $^1\text{H}$ -NMR Compound 2.

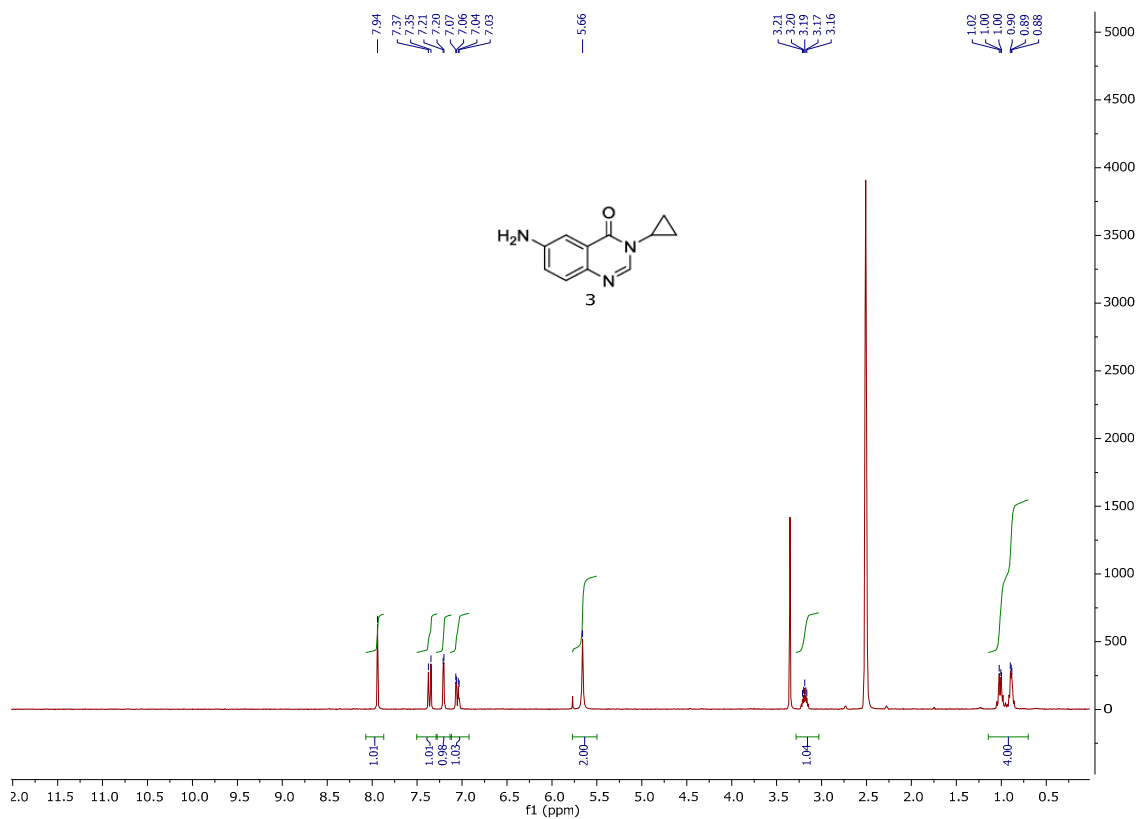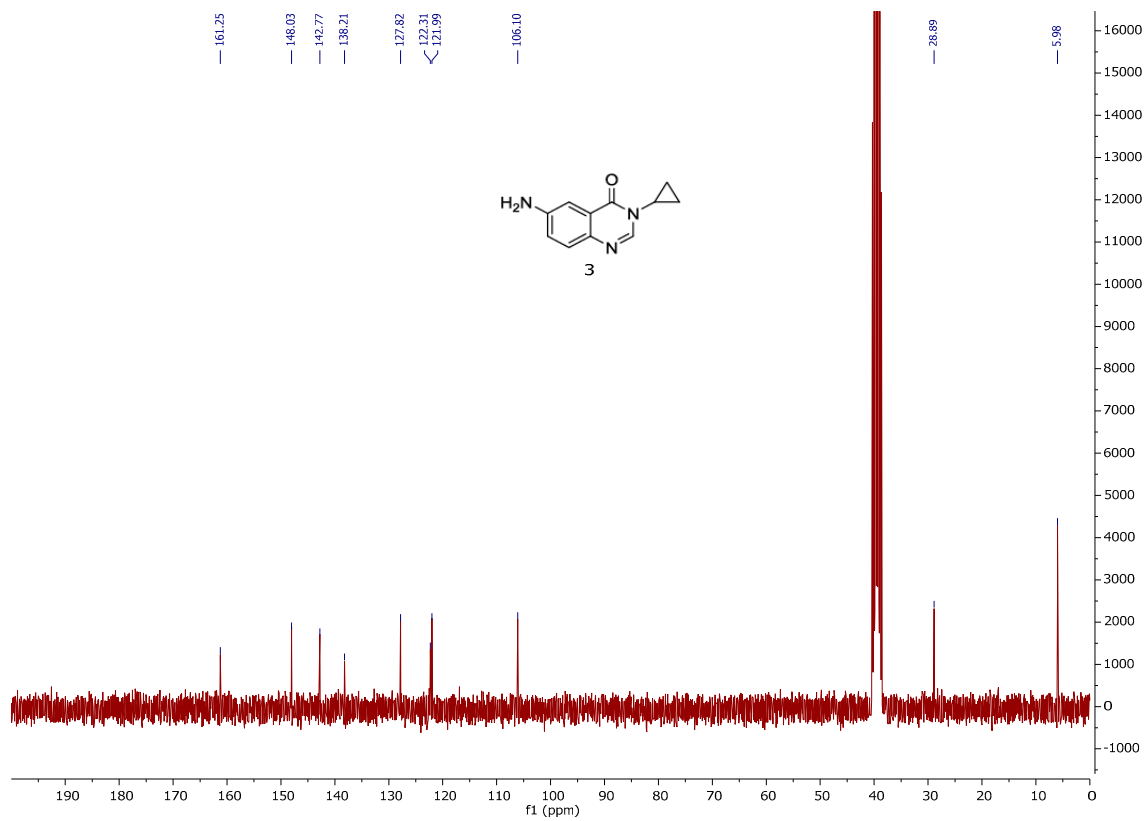

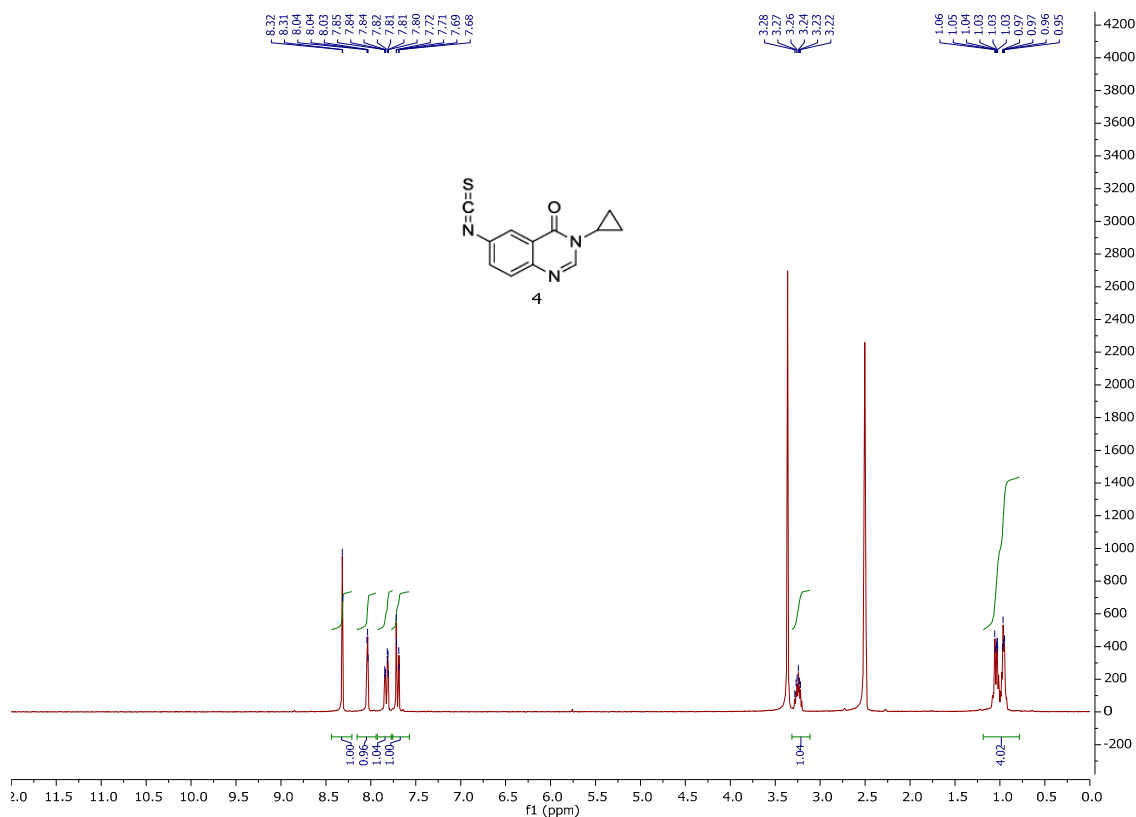

Figure S3. <sup>1</sup>H-NMR and <sup>13</sup>C-NMR Compound 4.

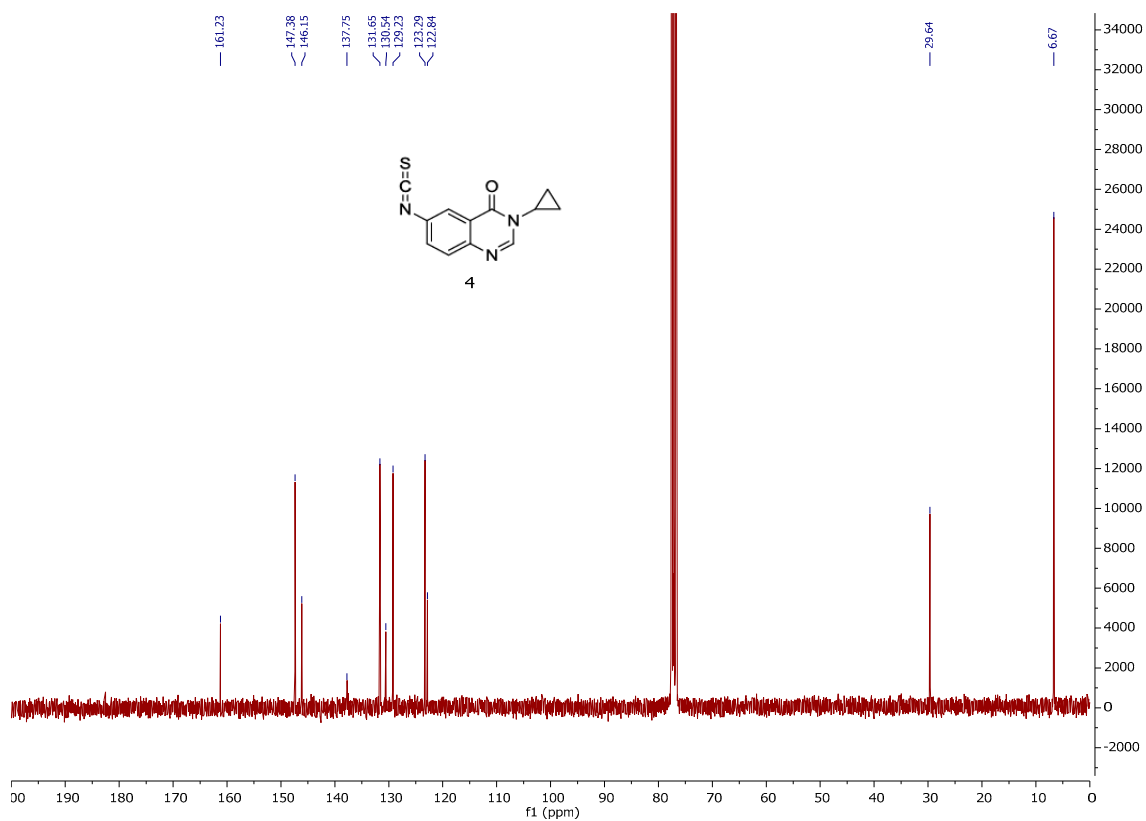

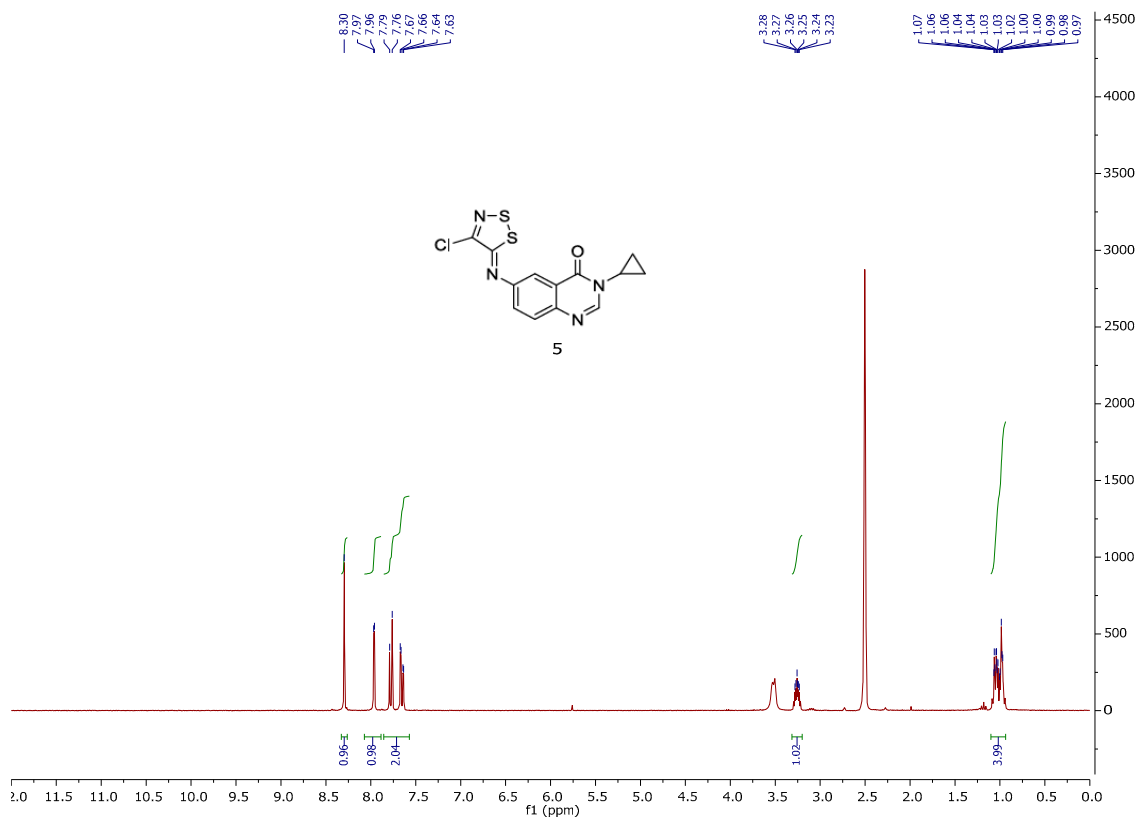Figure S4. <sup>1</sup>H-NMR and <sup>13</sup>C-NMR Compound 5.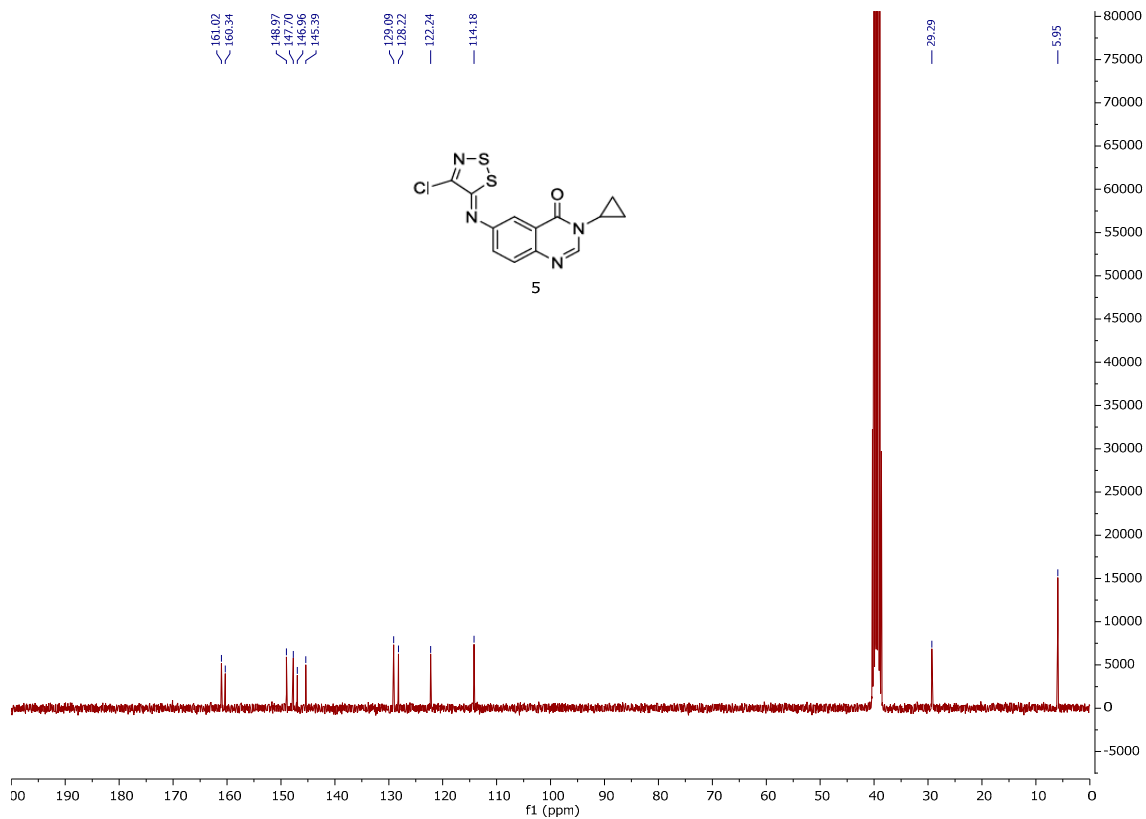

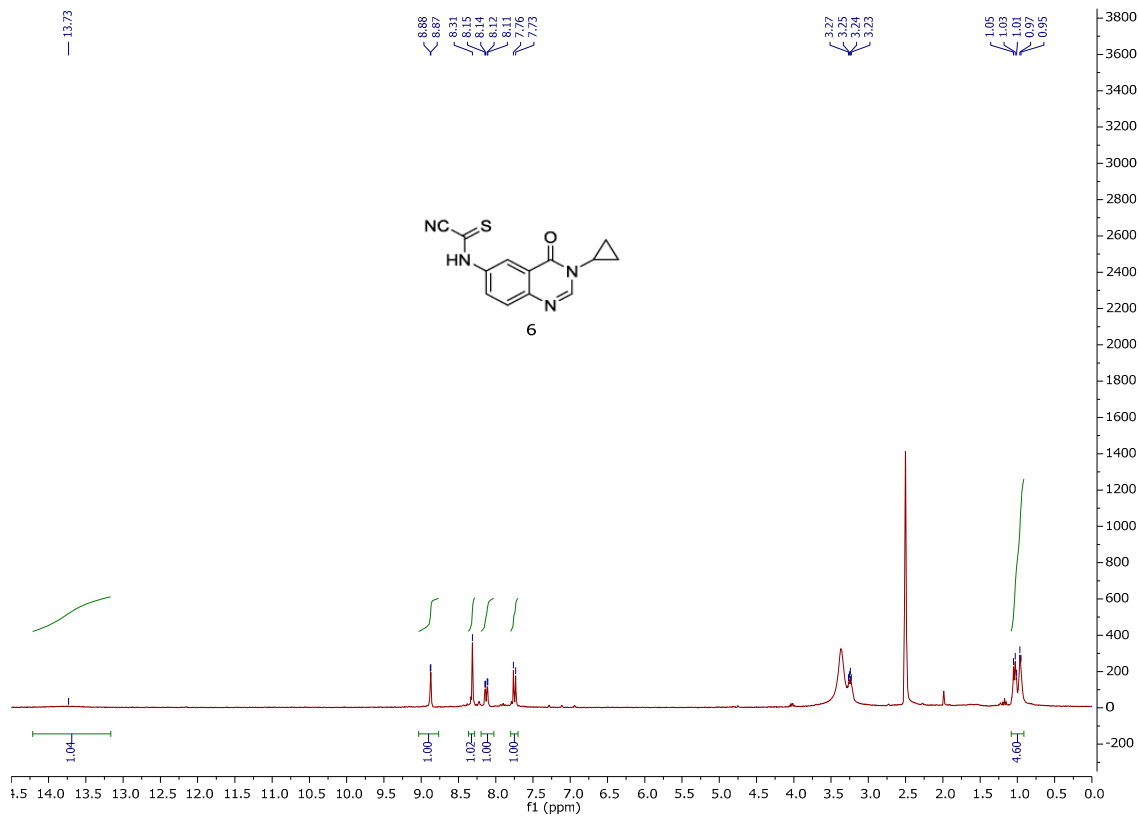Figure S5. <sup>1</sup>H-NMR and <sup>13</sup>C-NMR Compound 6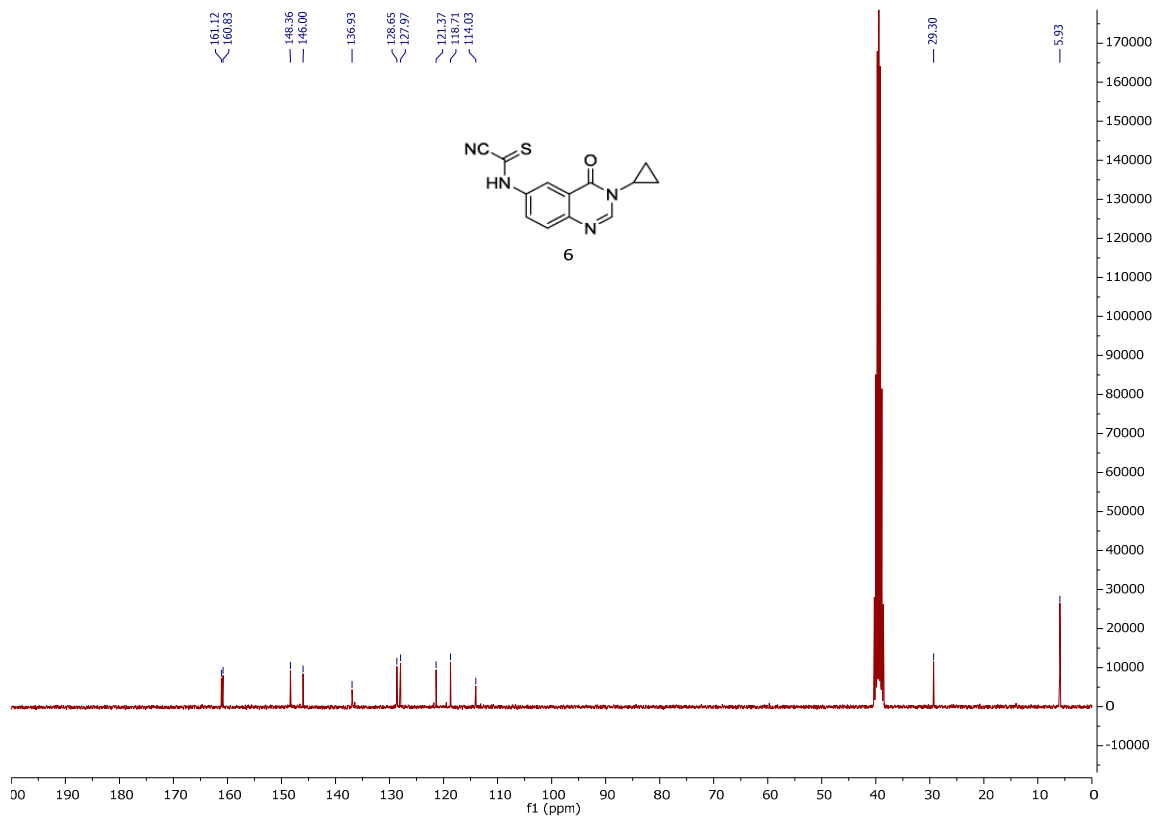

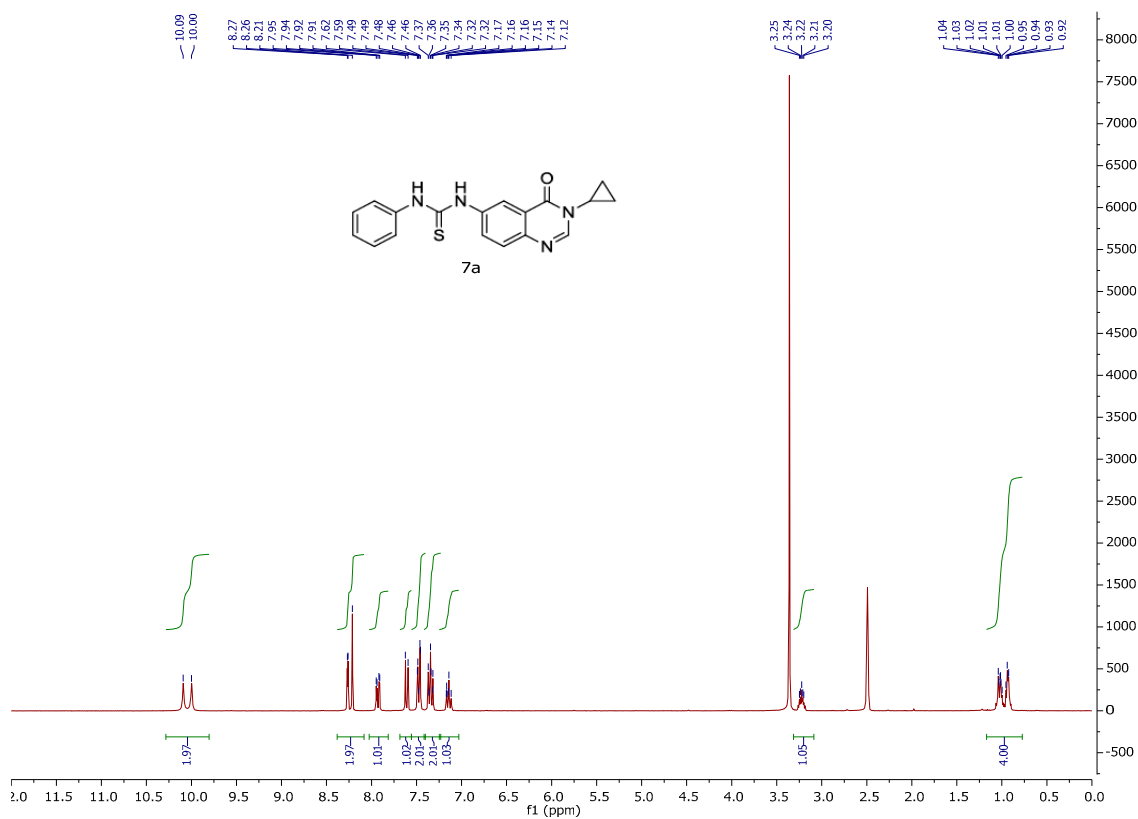Figure S6. <sup>1</sup>H-NMR and <sup>13</sup>C-NMR Compound 7a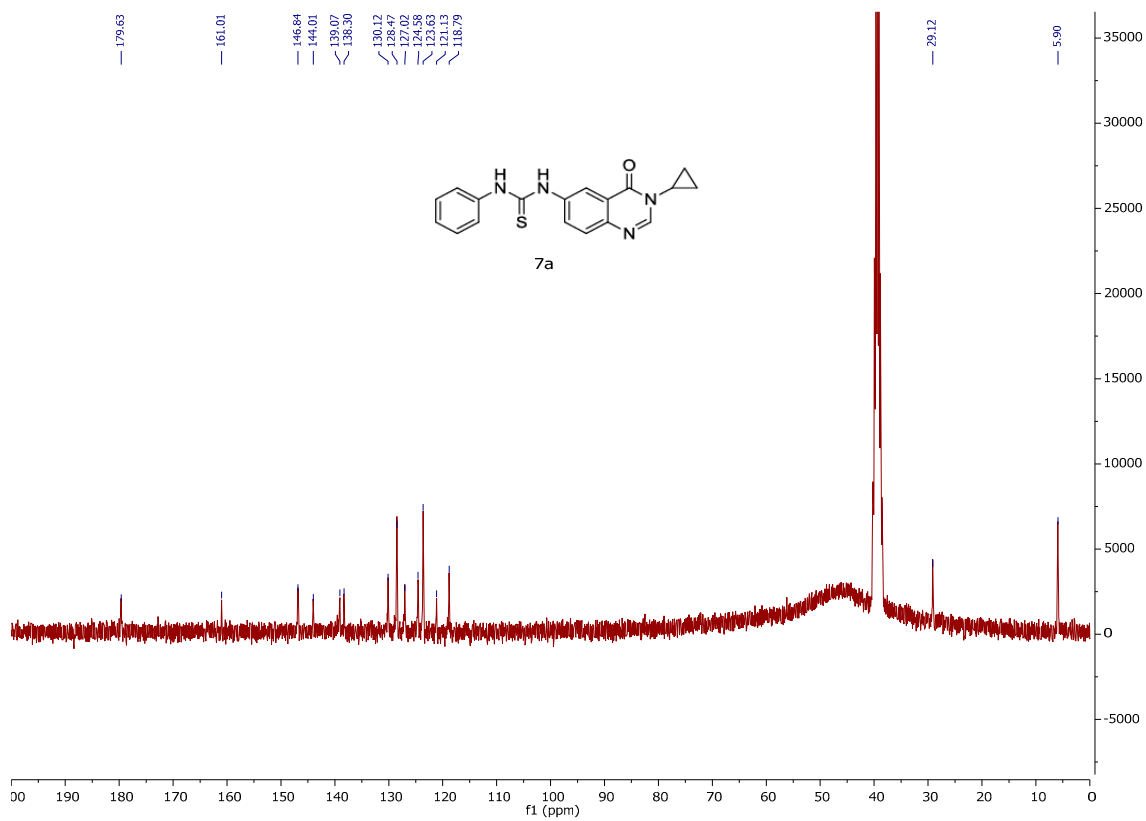

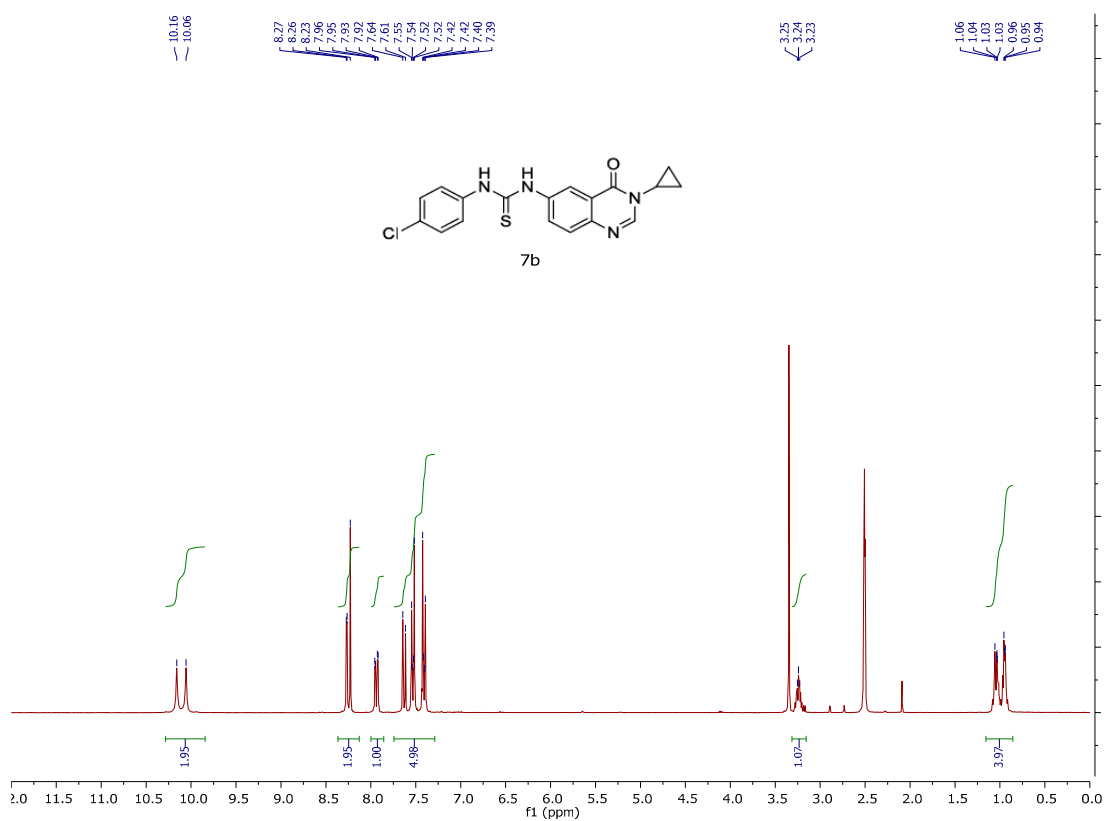Figure S7. <sup>1</sup>H-NMR and <sup>13</sup>C-NMR Compound 7b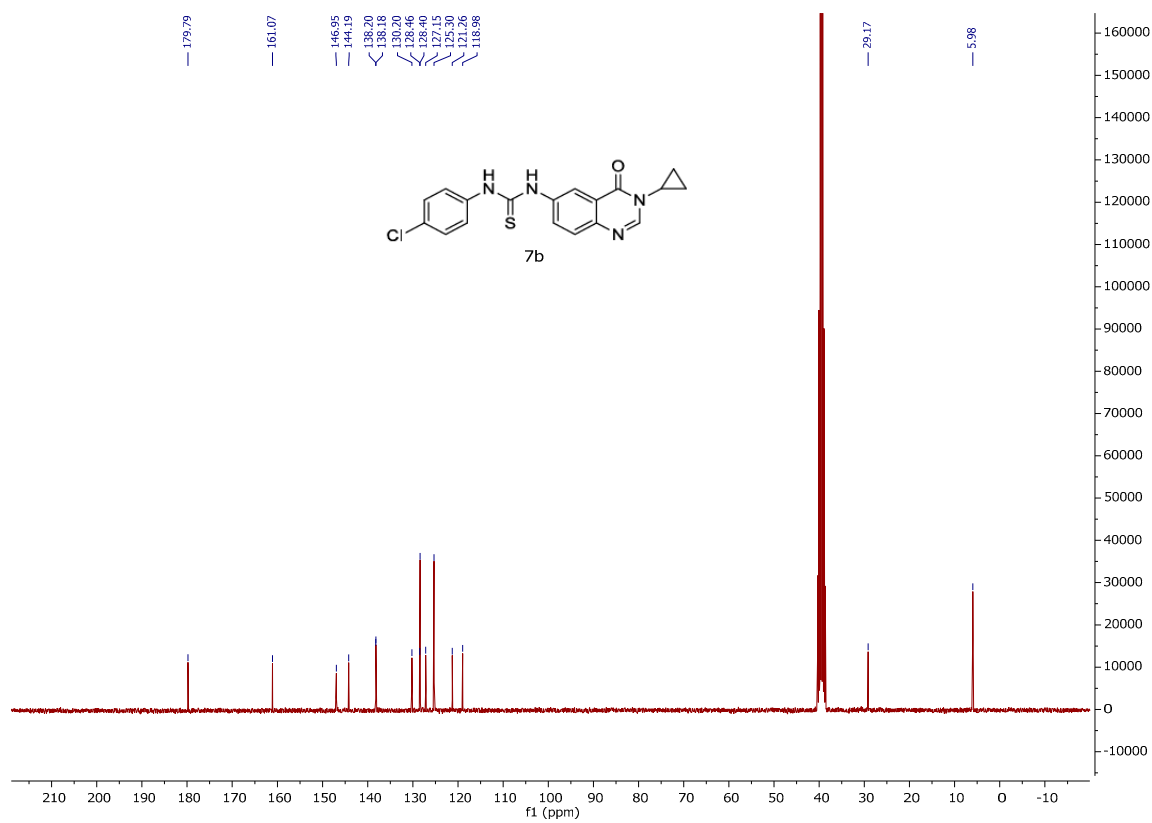

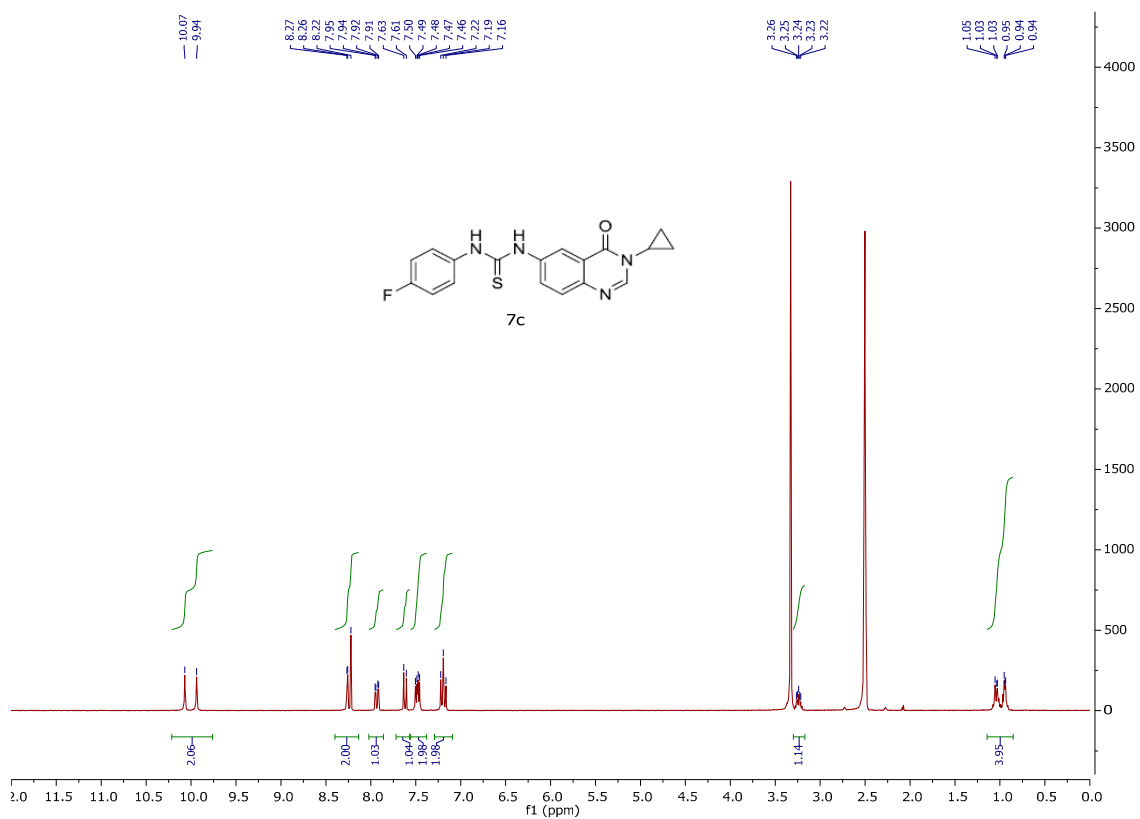

**Figure S8.  $^1\text{H}$ -NMR and  $^{13}\text{C}$ -NMR Compound 7c**

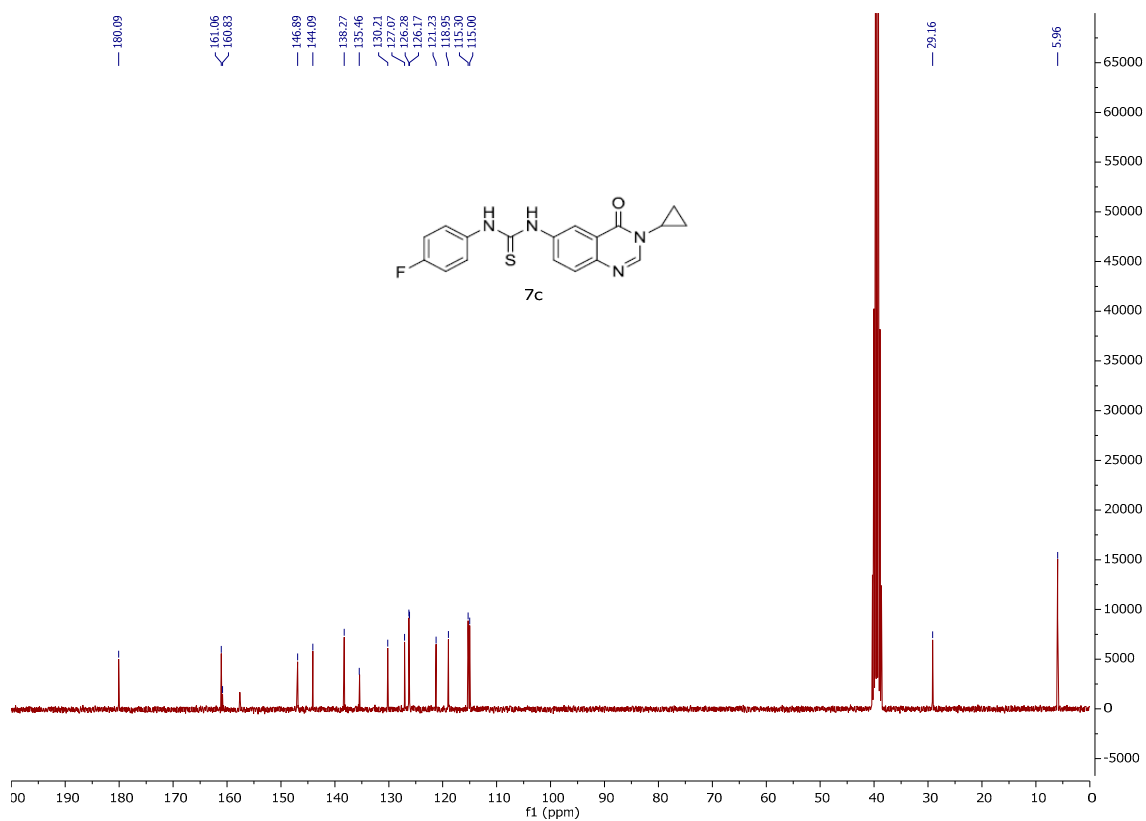



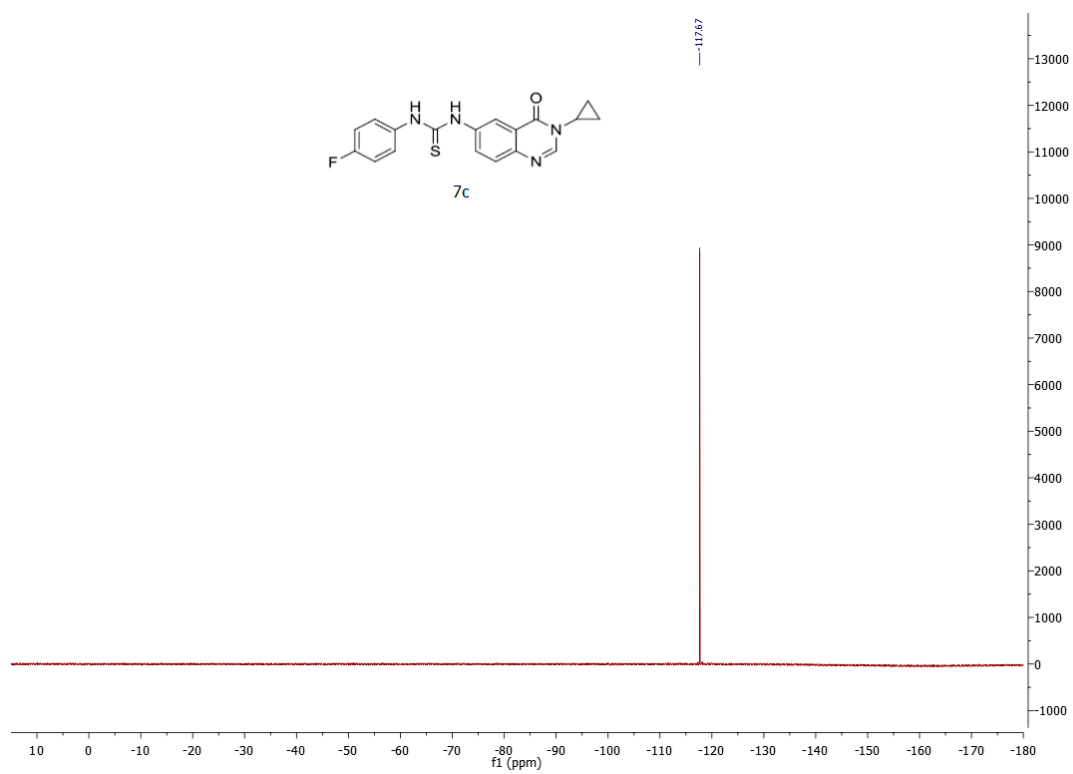

Figure S9.  $^{19}\text{F}$ -NMR Compound 7c

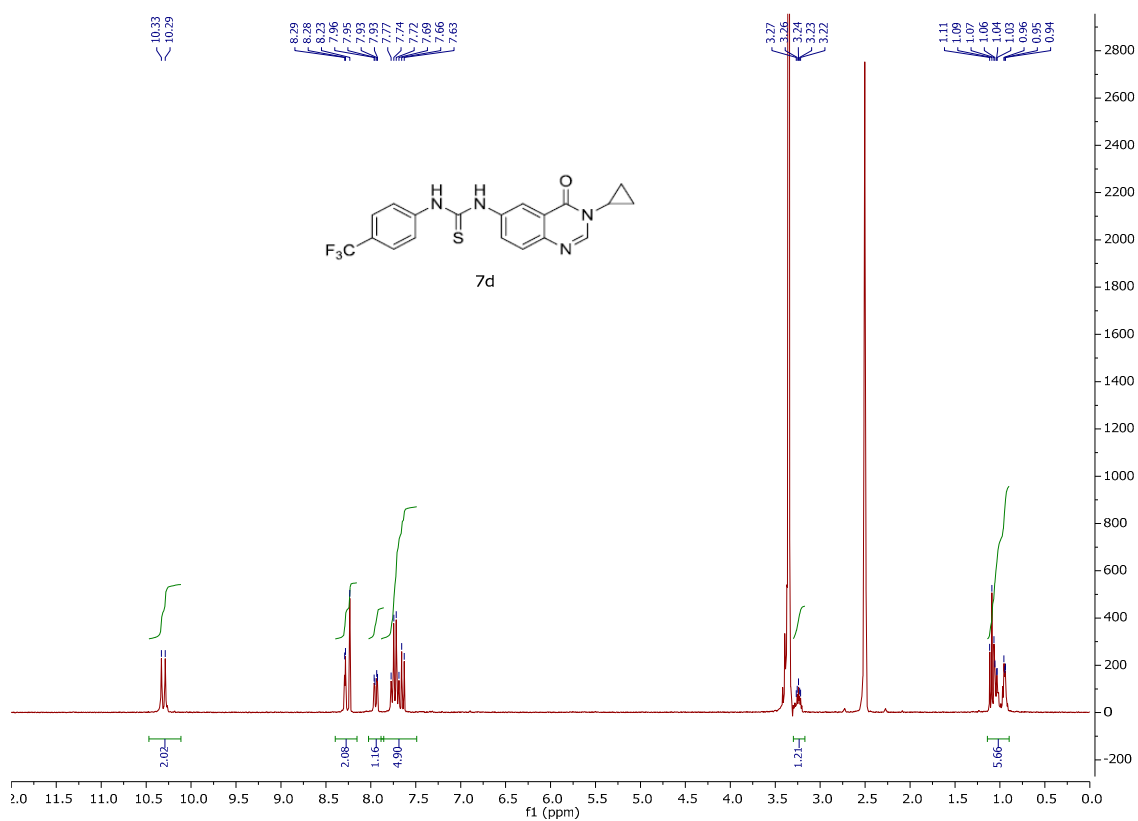Figure S10. <sup>1</sup>H-NMR and <sup>13</sup>C-NMR Compound 7d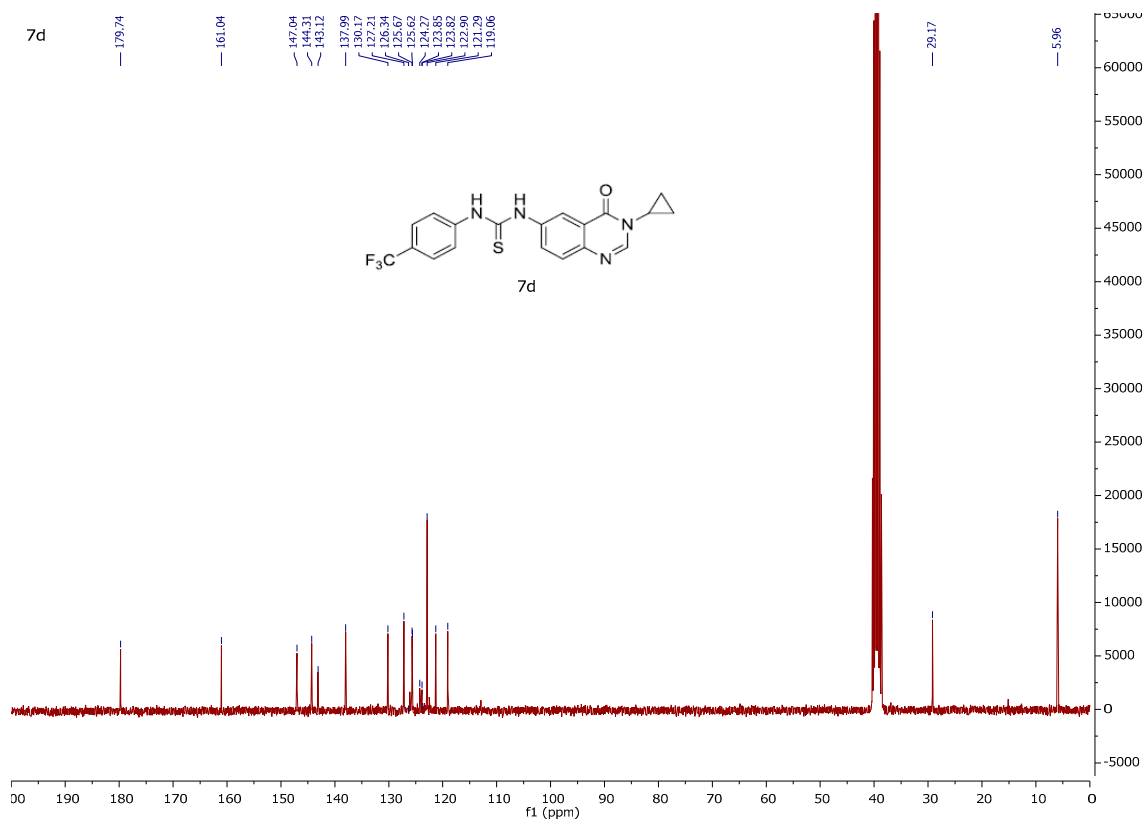

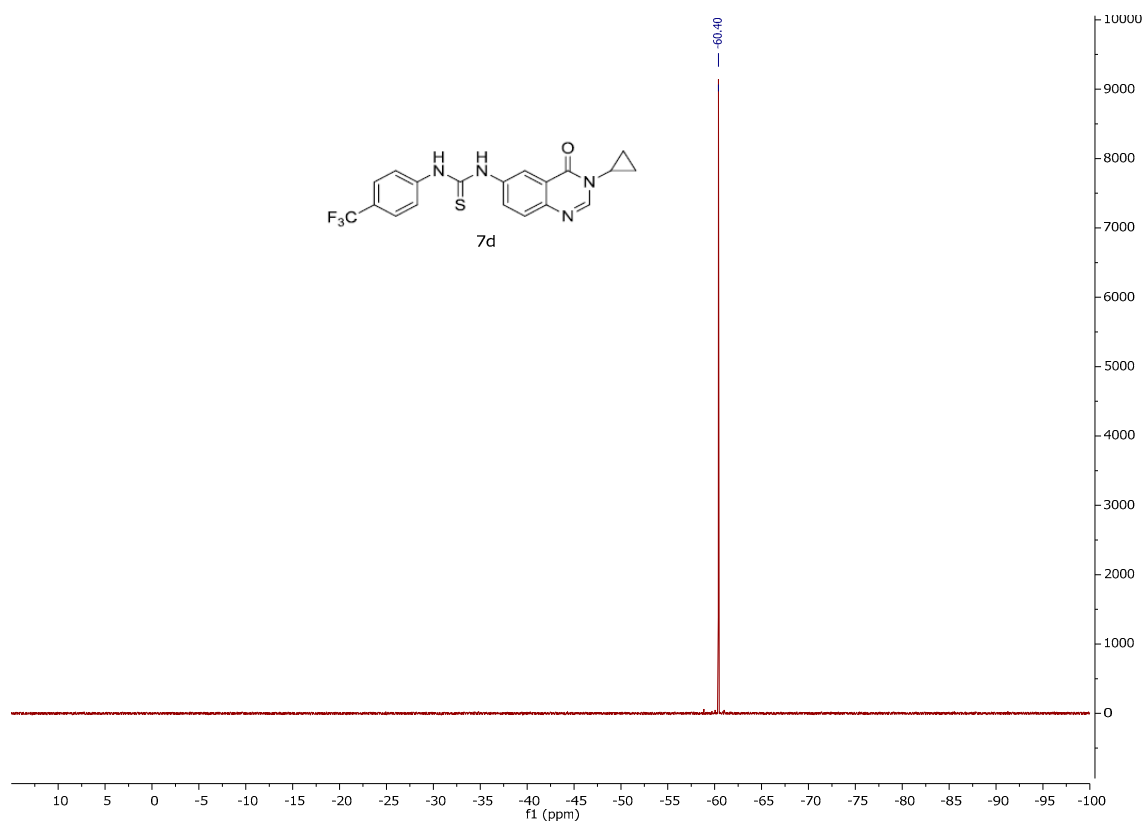

Figure S11.  $^{19}\text{F}$ -NMR Compound 7d

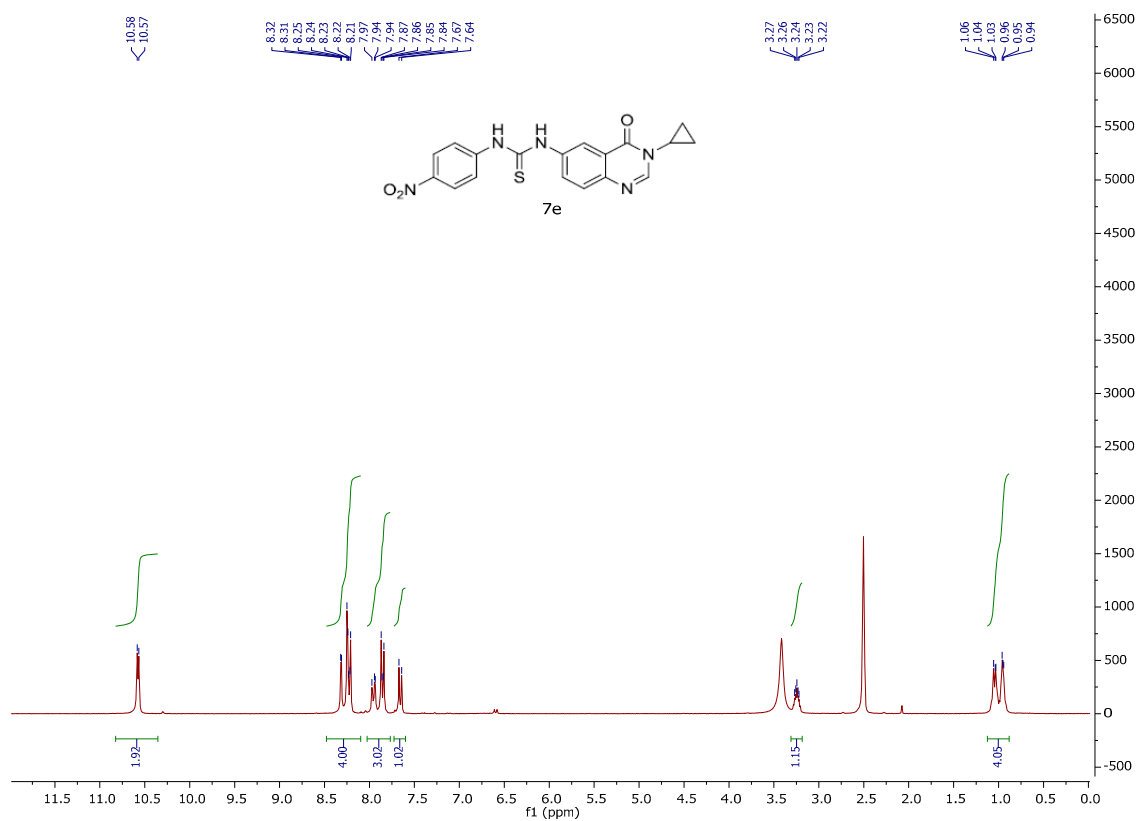Figure S12. <sup>1</sup>H-NMR and <sup>13</sup>C-NMR Compound 7e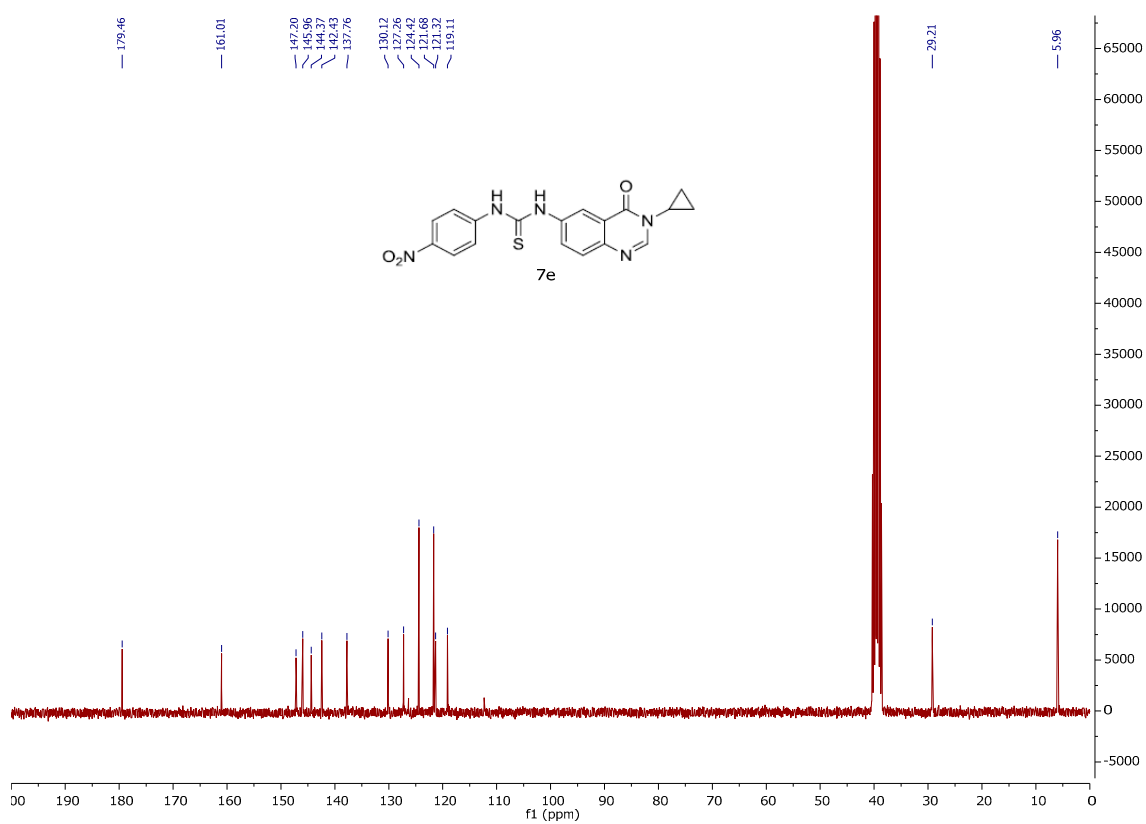

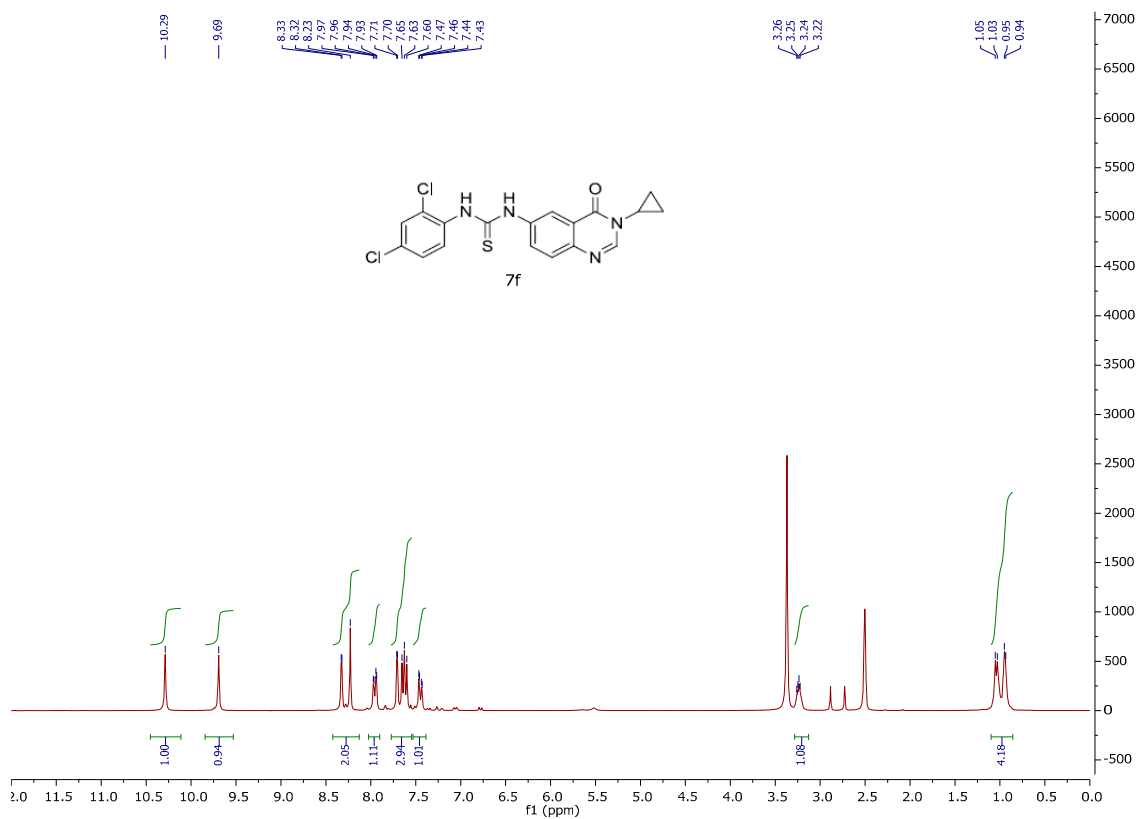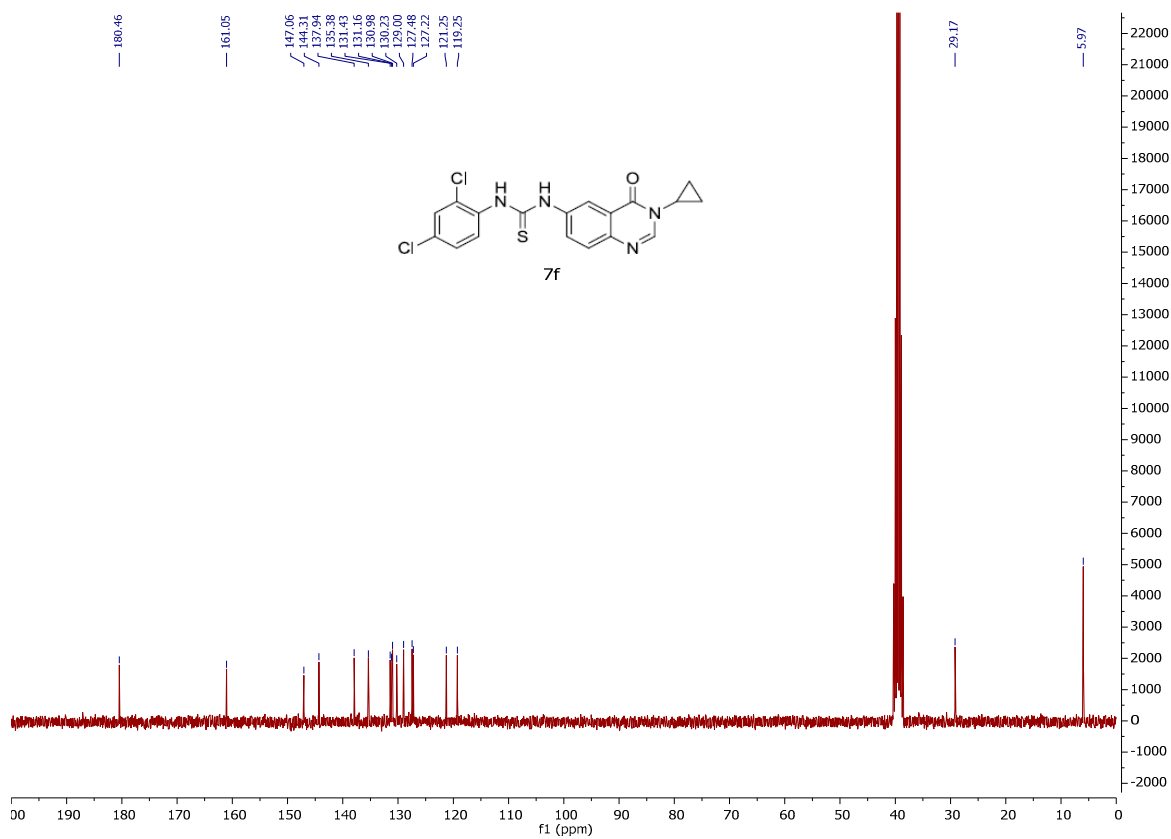

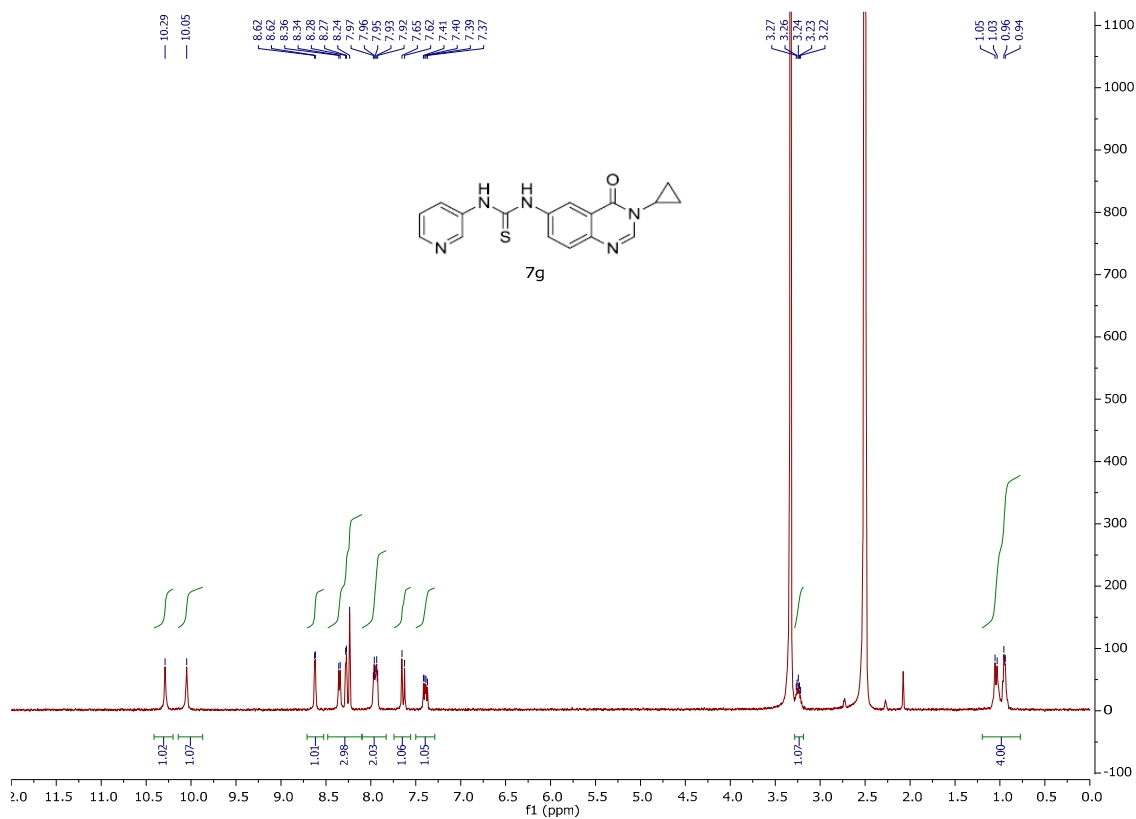Figure S14. <sup>1</sup>H-NMR and <sup>13</sup>C-NMR Compound 7g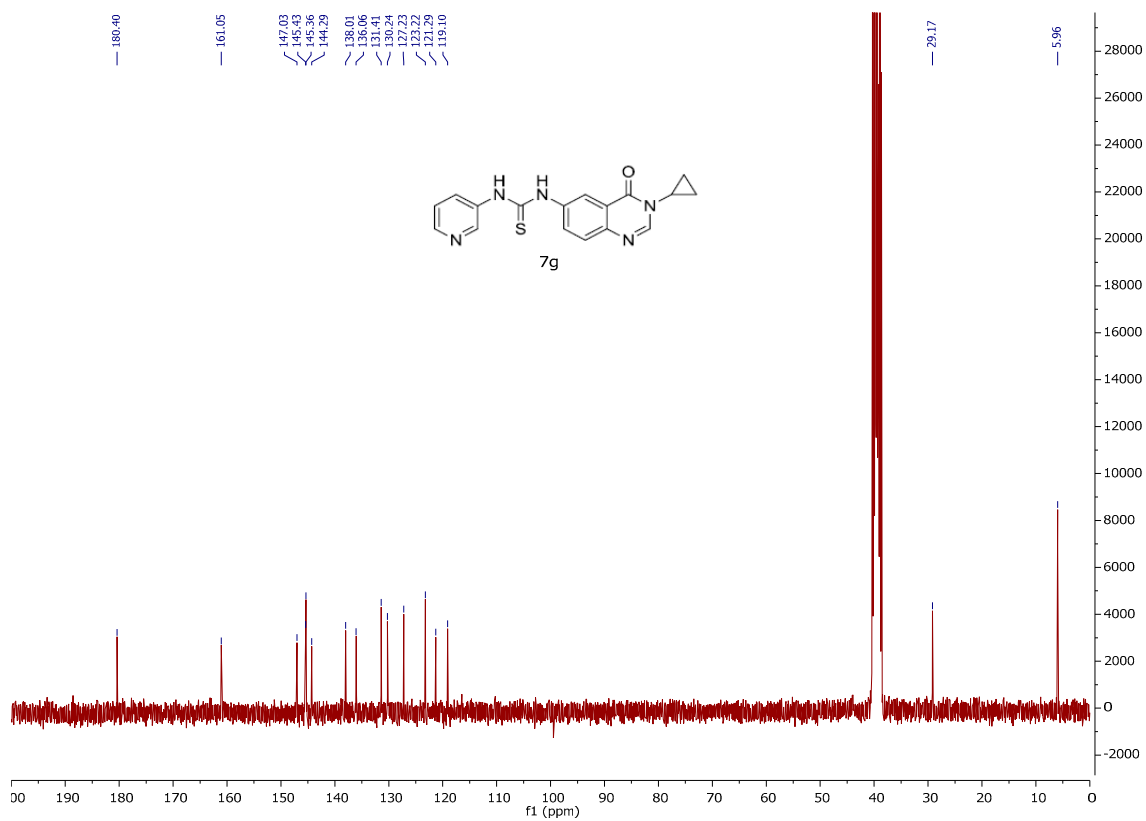

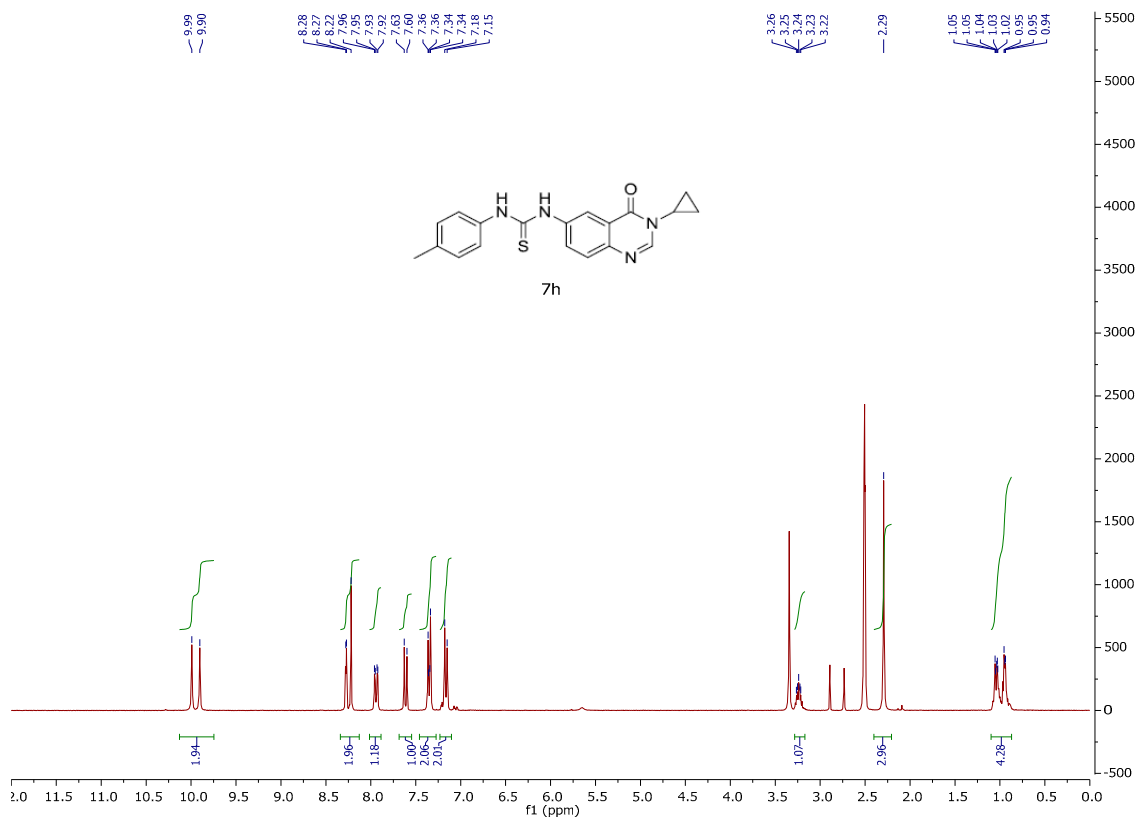Figure S15. <sup>1</sup>H-NMR and <sup>13</sup>C-NMR Compound 7h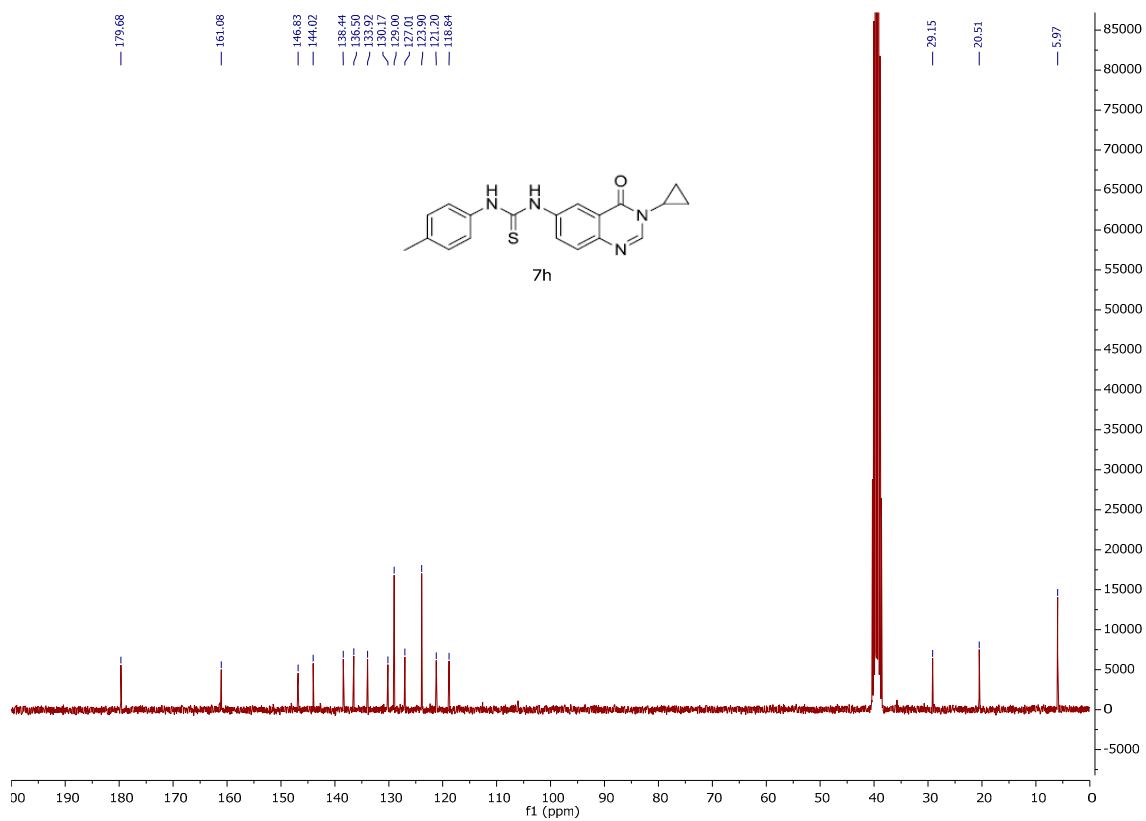

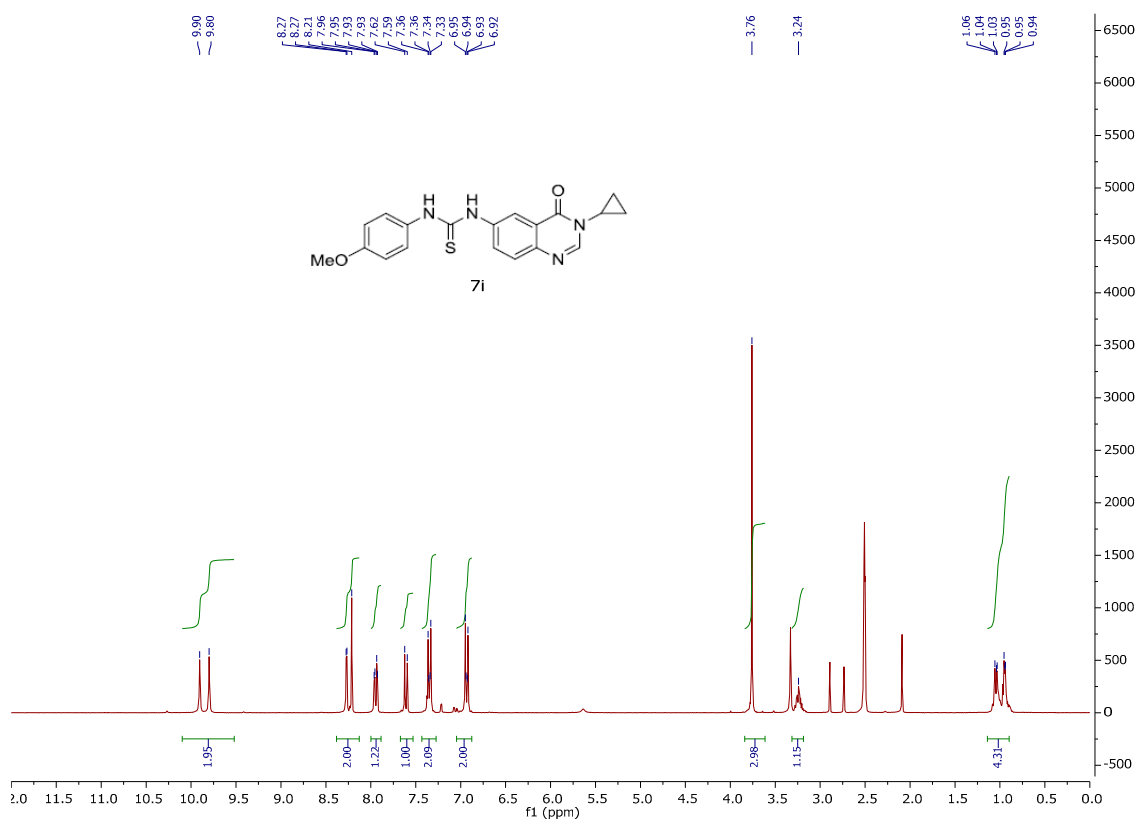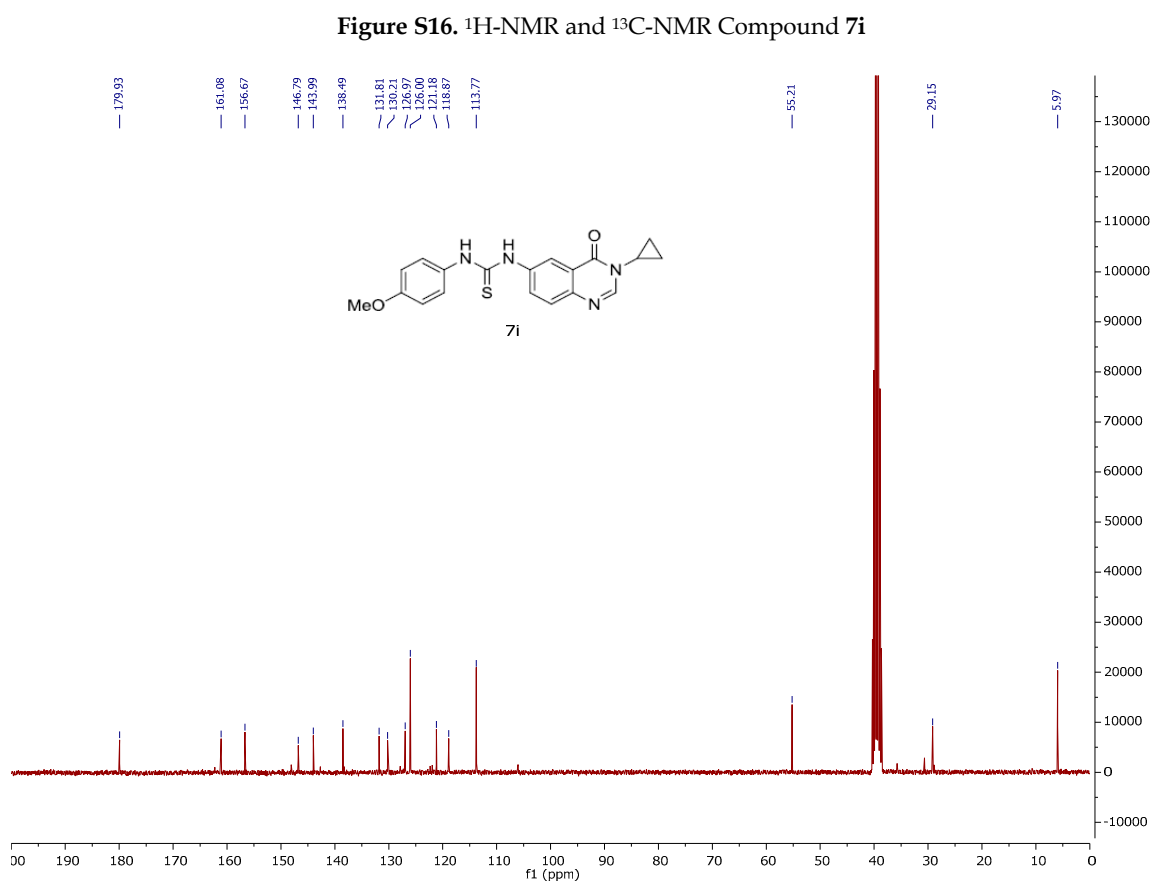



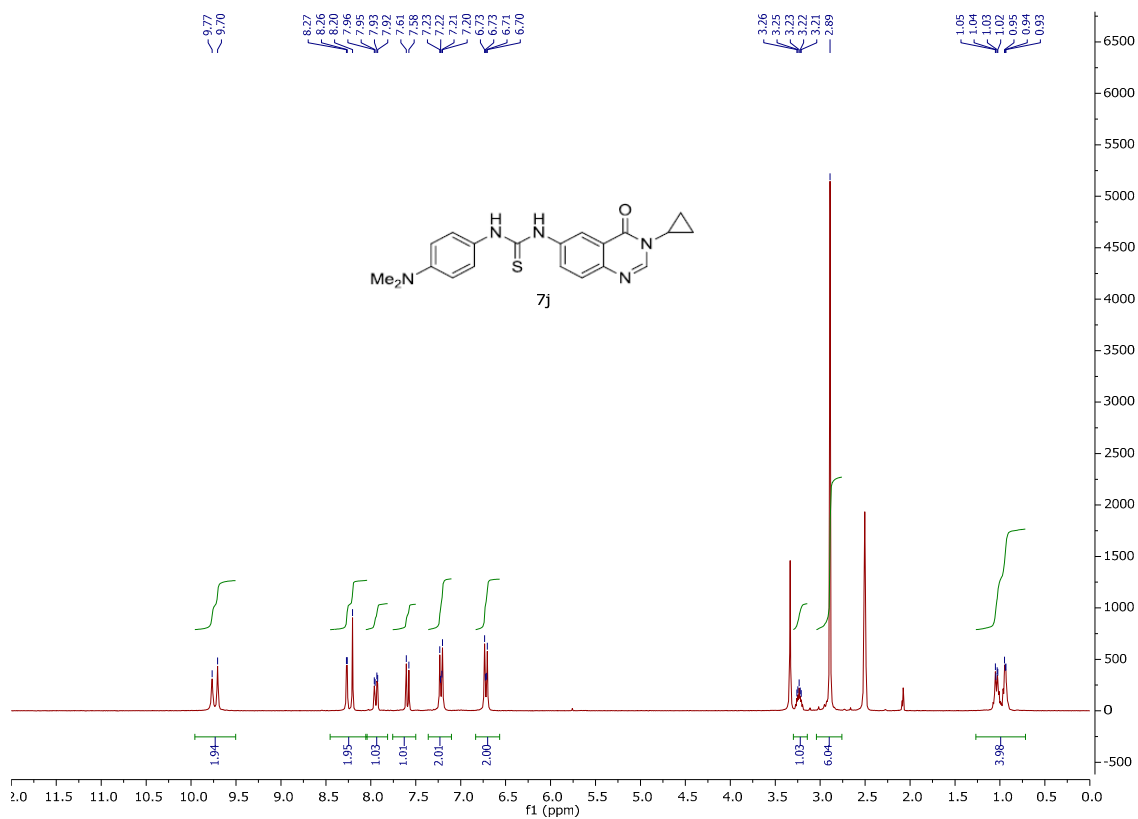Figure S17. <sup>1</sup>H-NMR and <sup>13</sup>C-NMR Compound 7j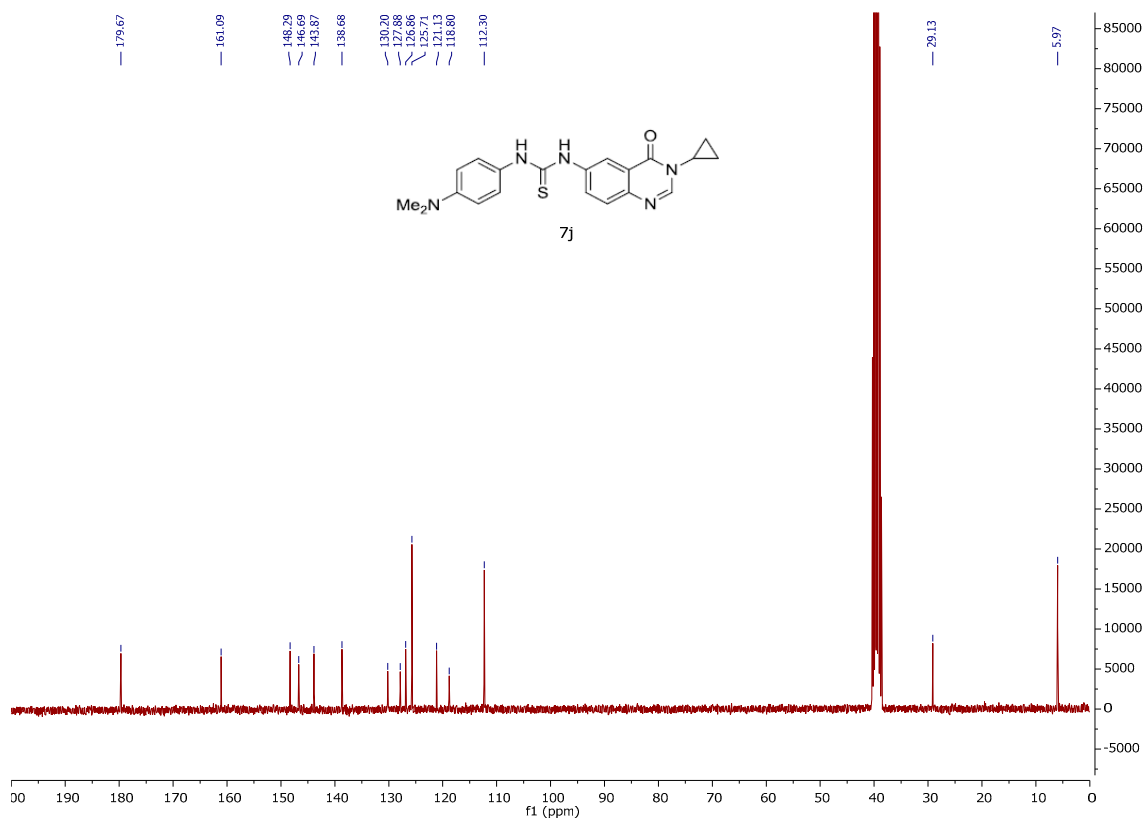

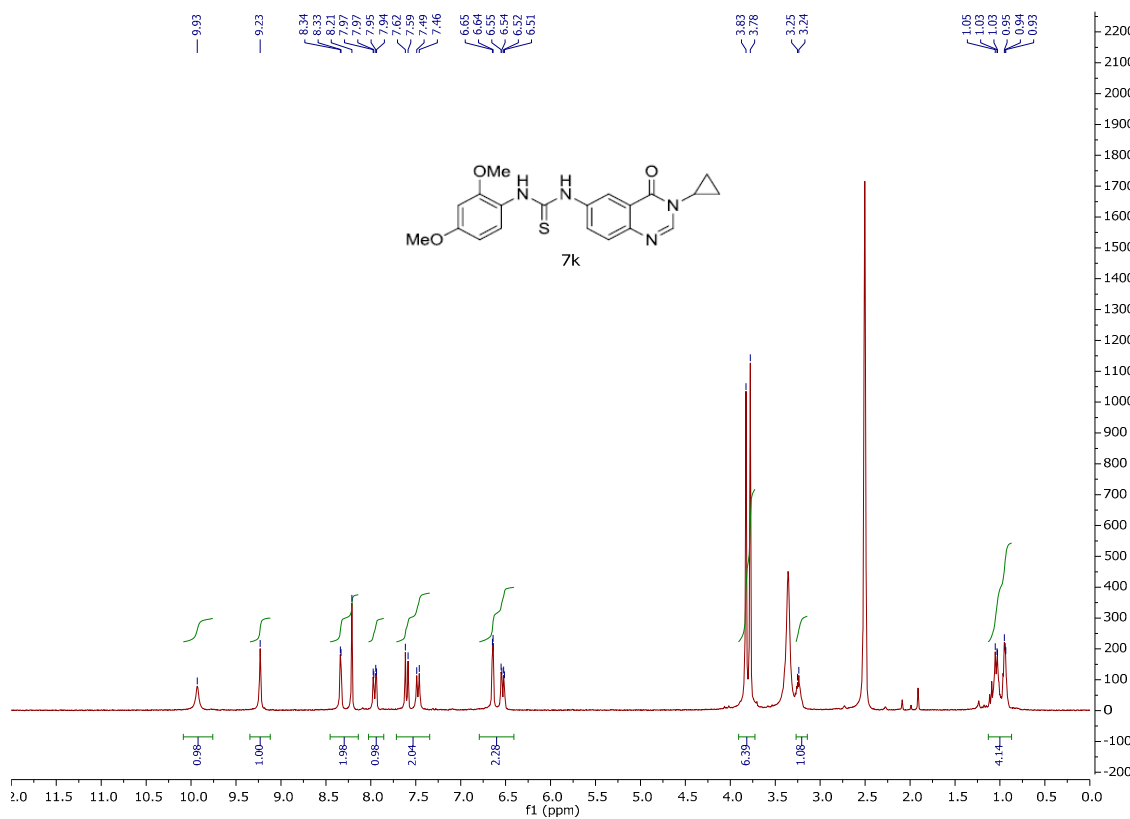Figure S18. <sup>1</sup>H-NMR and <sup>13</sup>C-NMR Compound 7k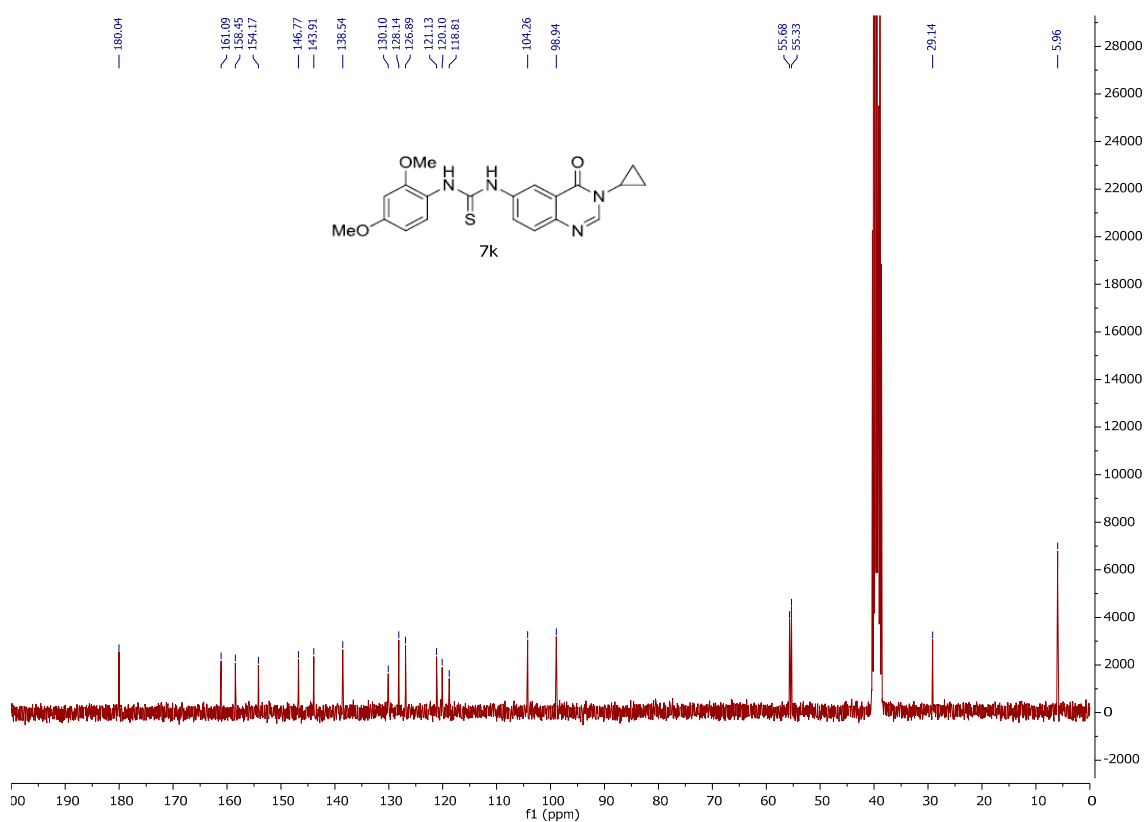

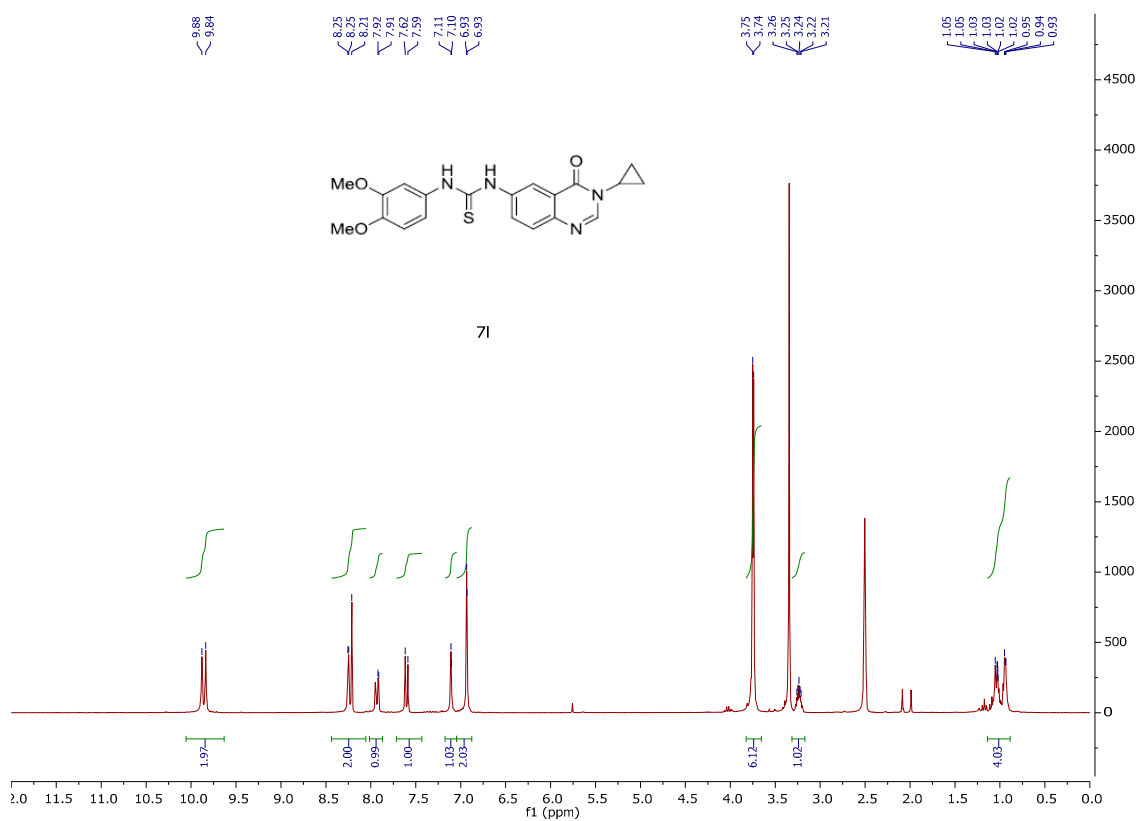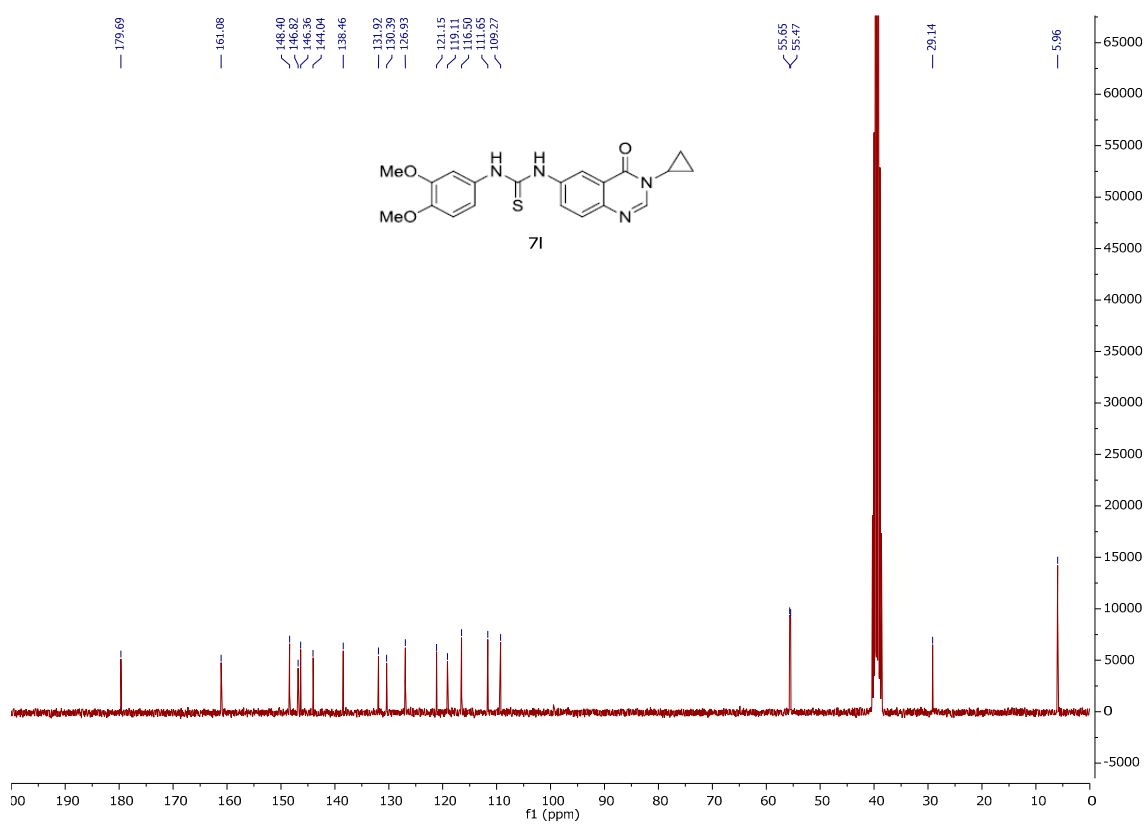

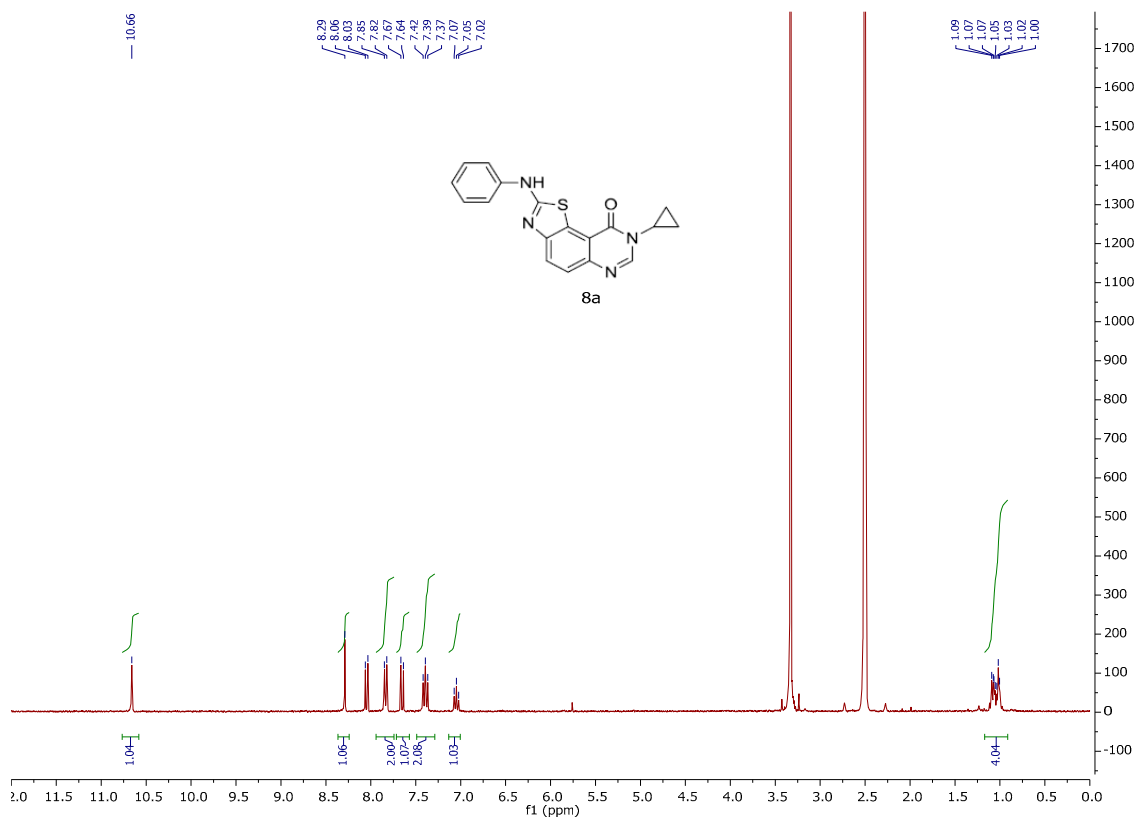

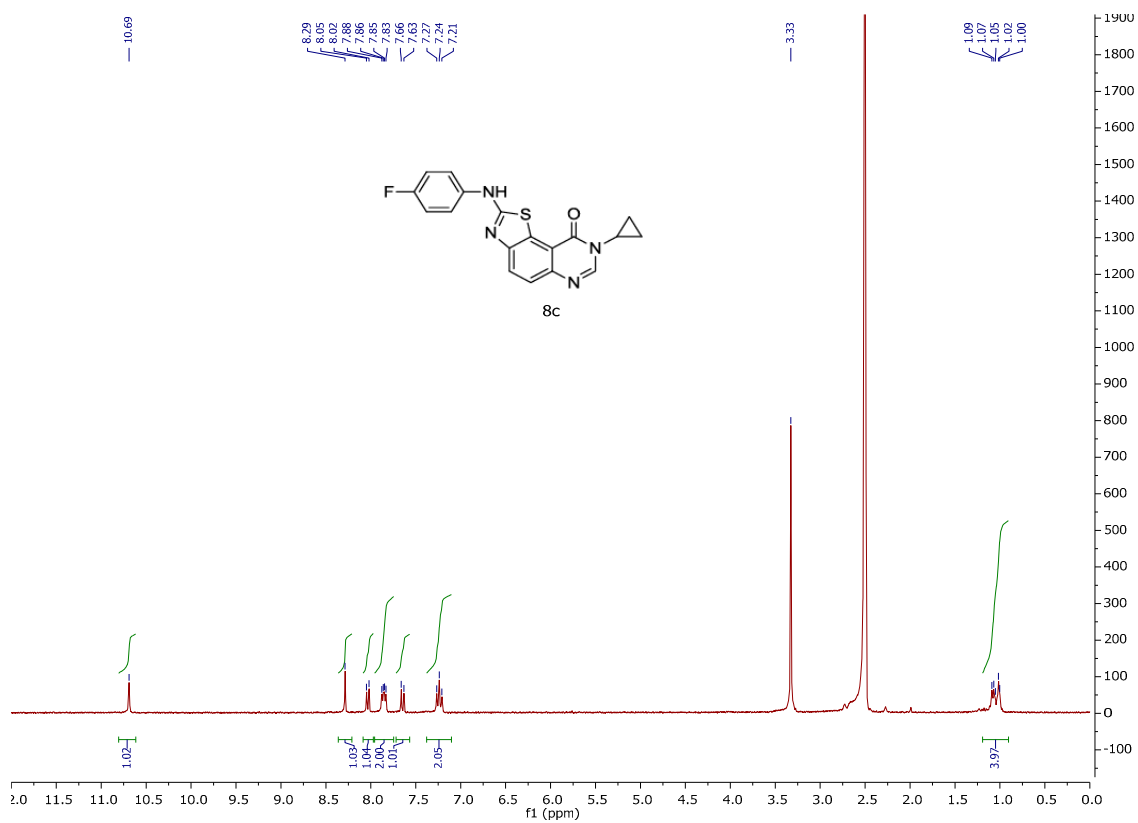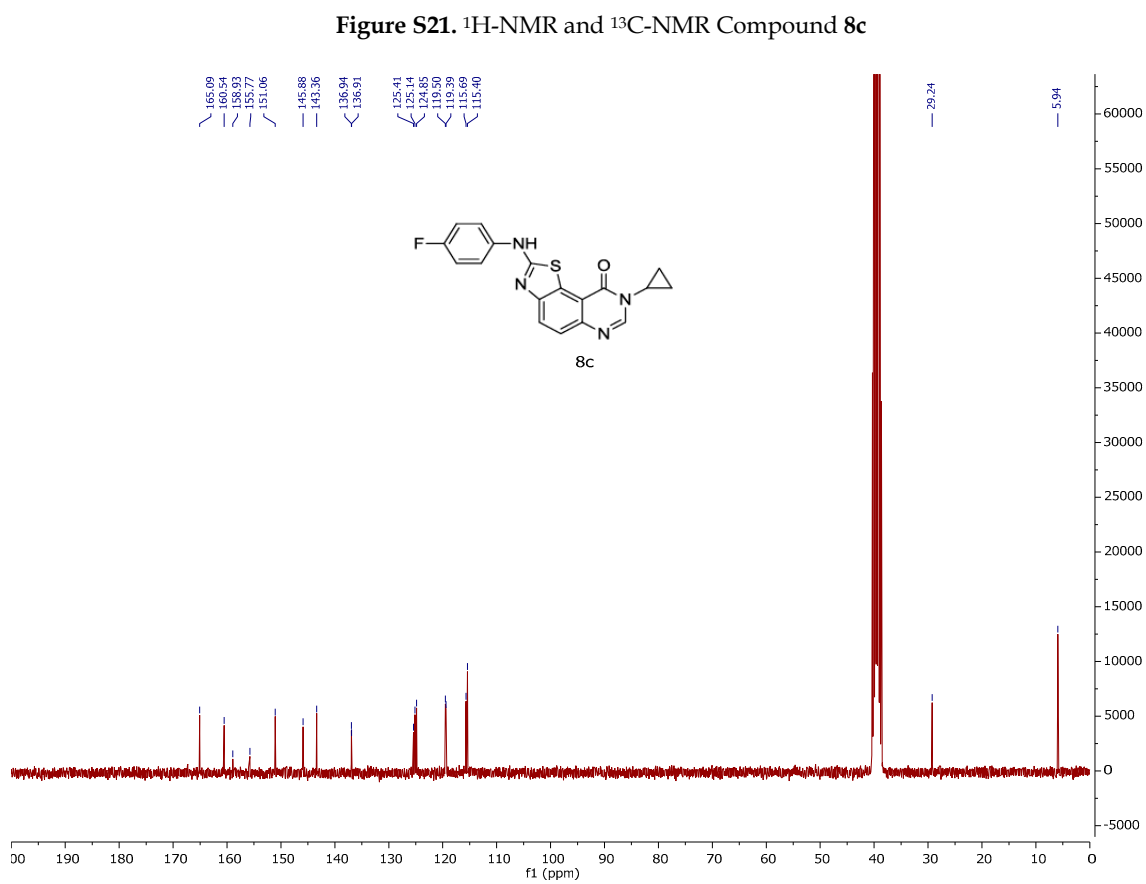

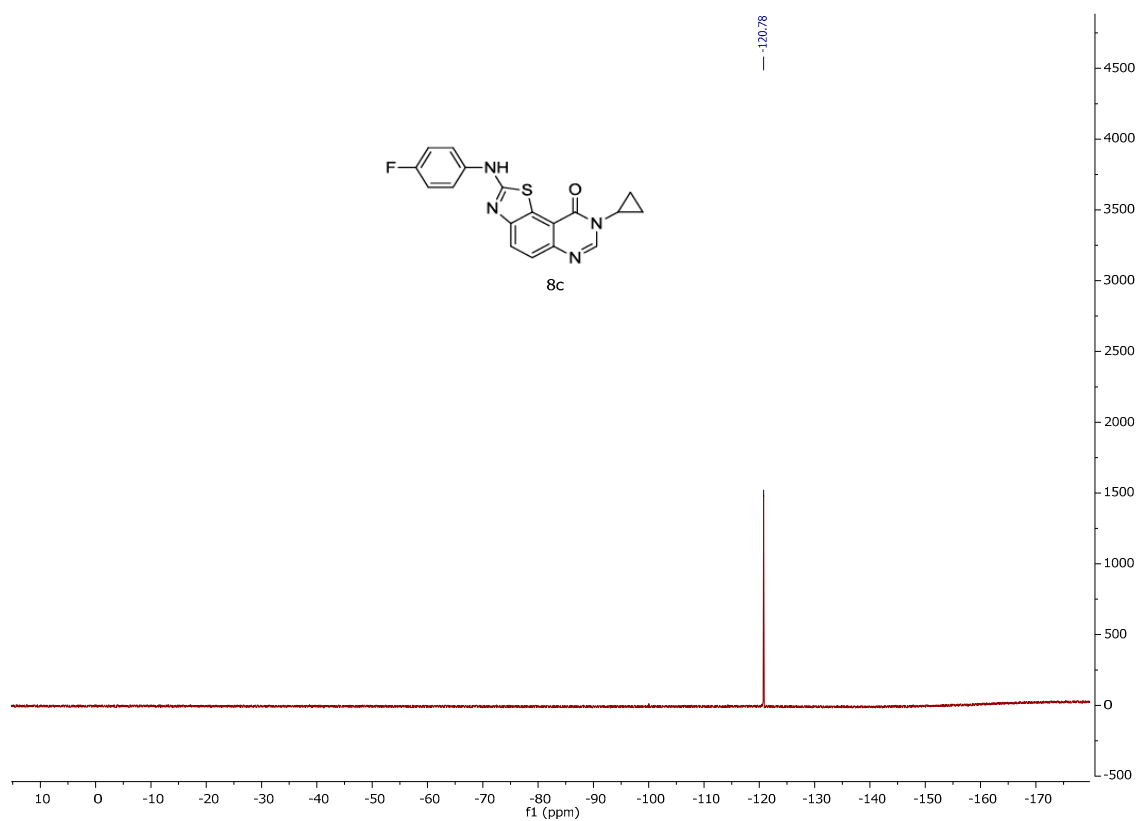

Figure S22.  $^{19}\text{F}$ -NMR Compound 8c

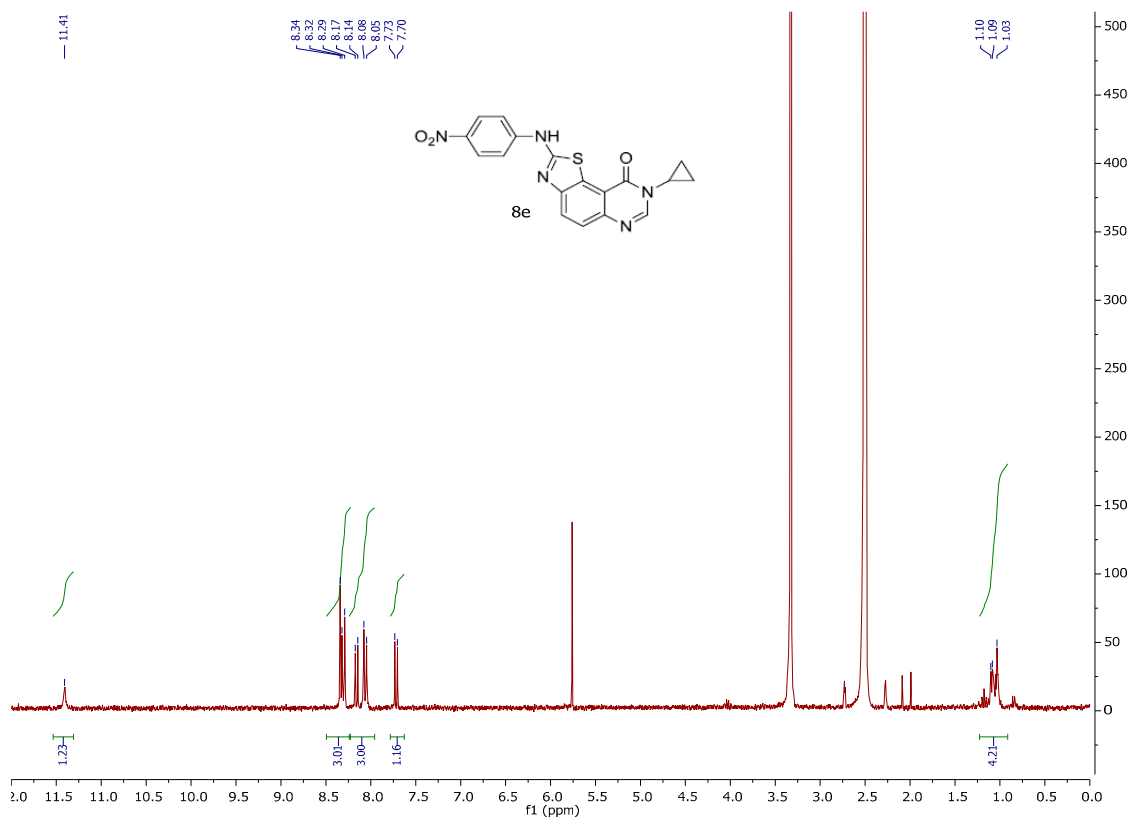

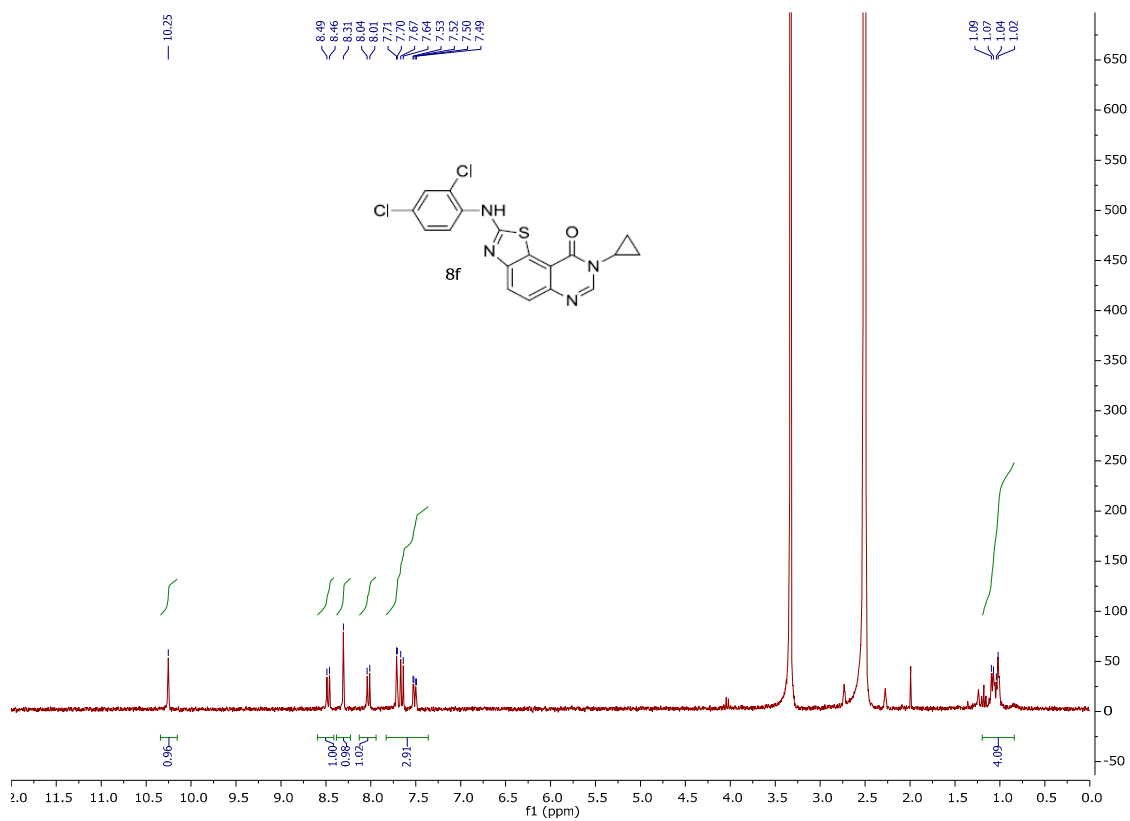Figure S24. <sup>1</sup>H-NMR and <sup>13</sup>C-NMR Compound 8f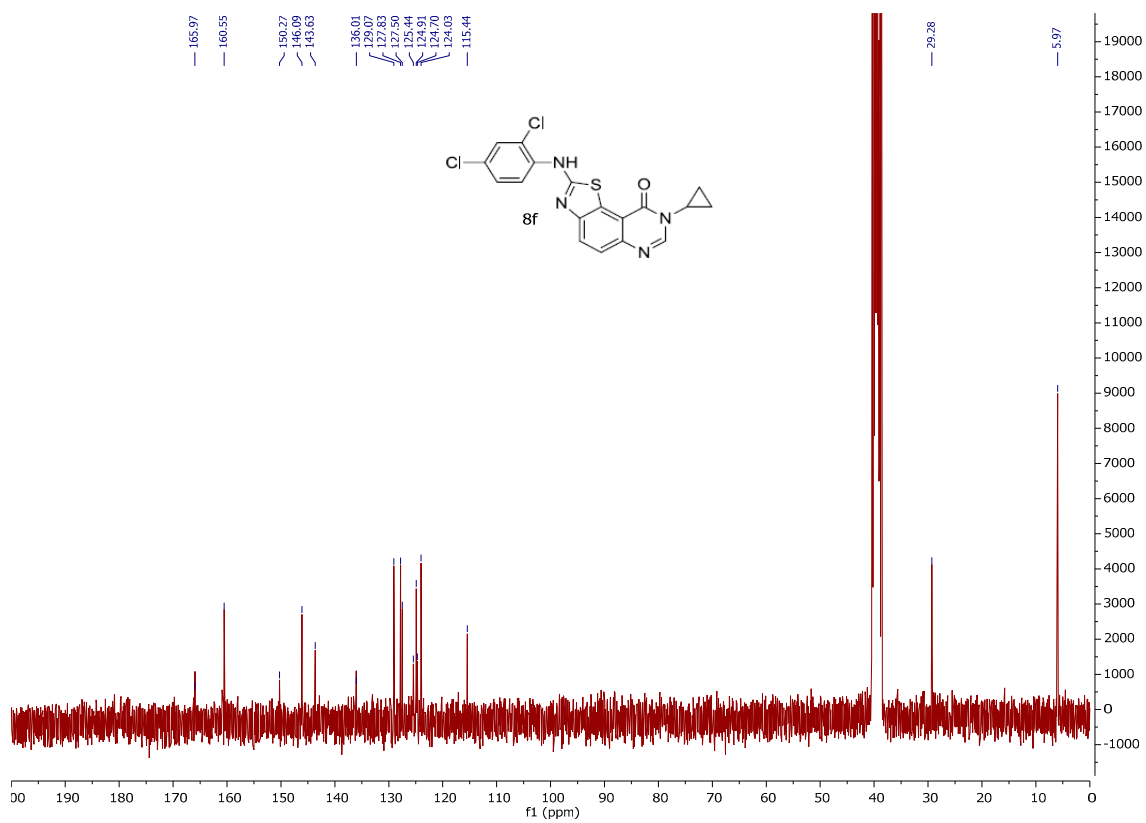



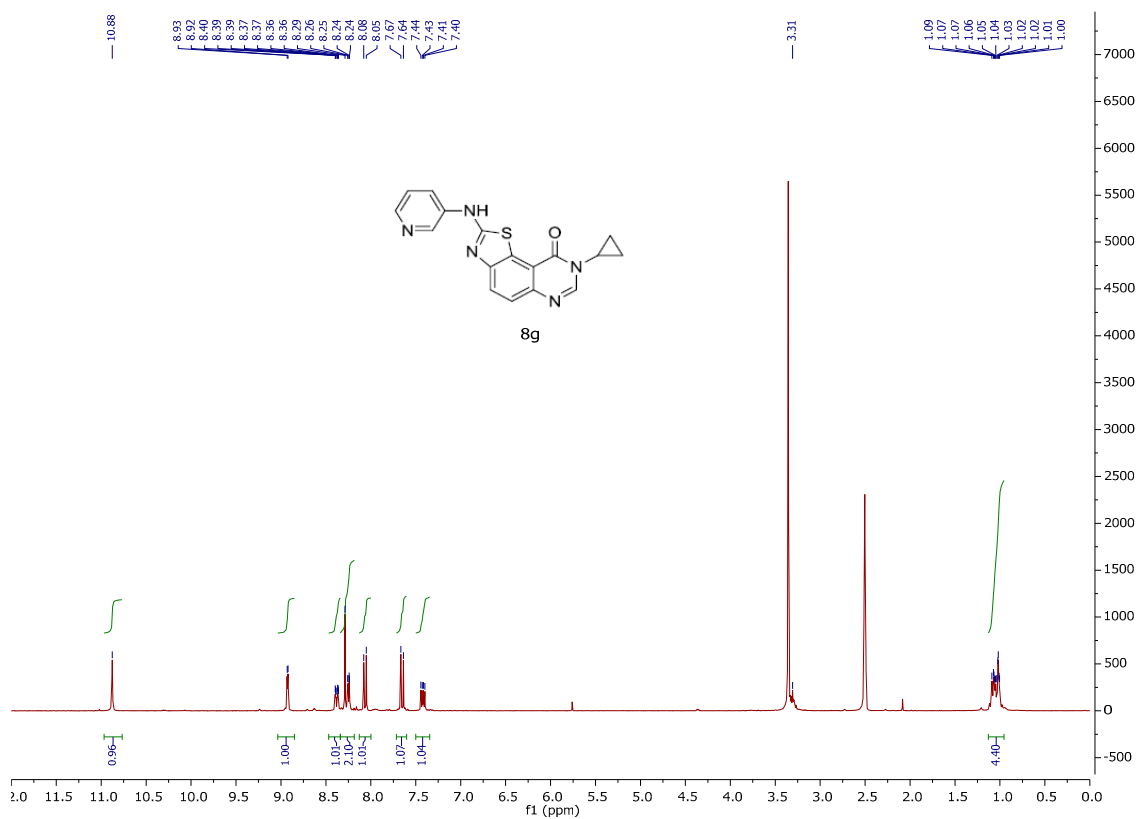Figure S25. <sup>1</sup>H-NMR and <sup>13</sup>C-NMR Compound 8g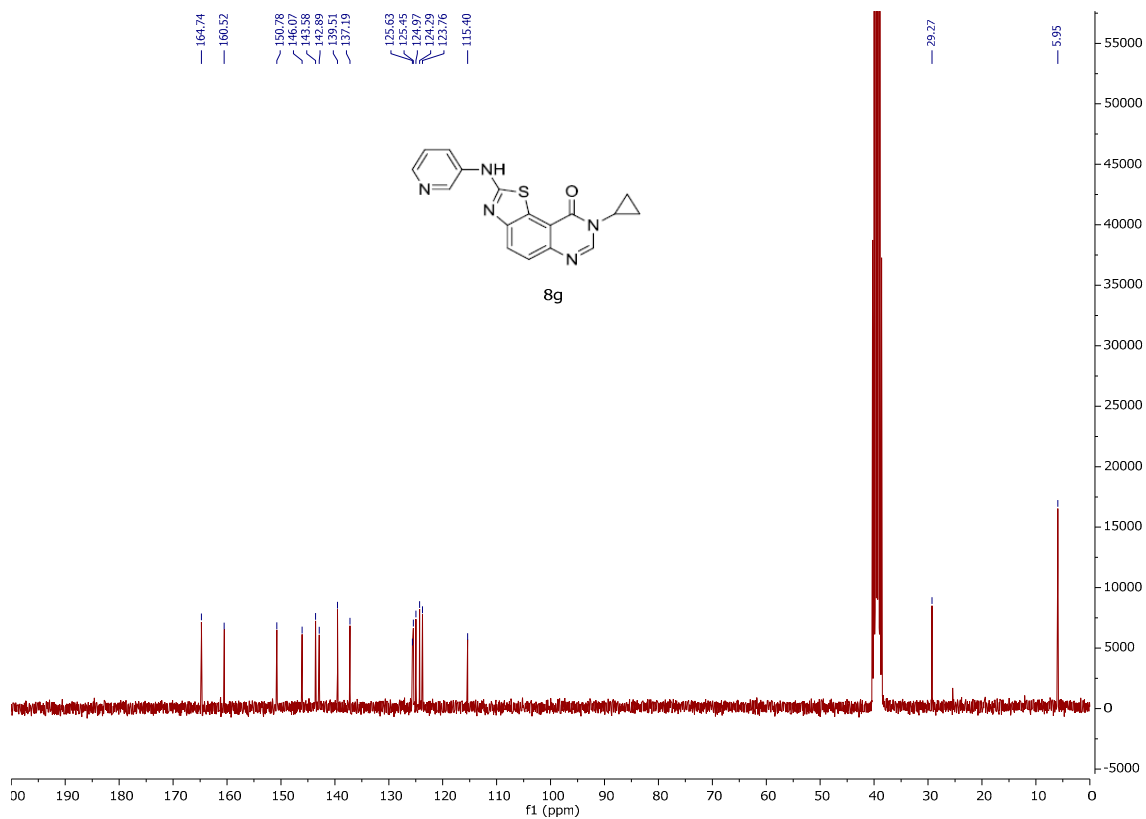

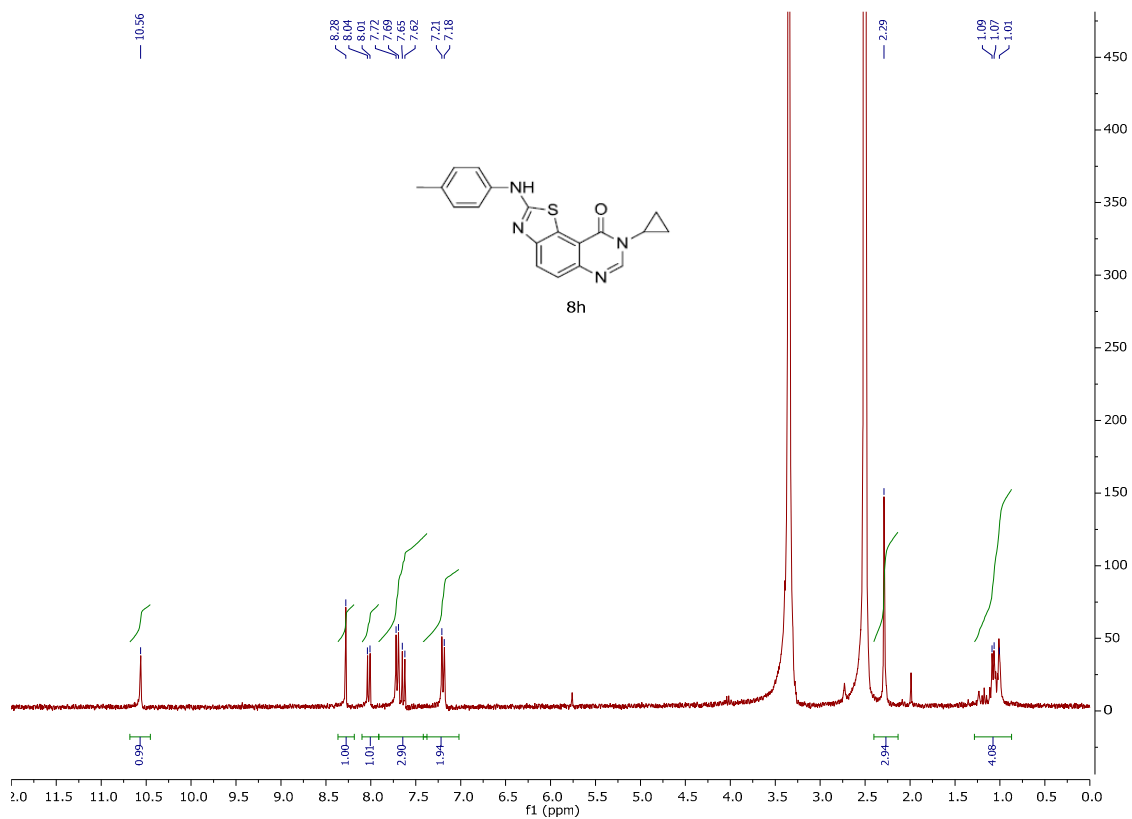Figure S26.  $^1\text{H-NMR}$  and  $^{13}\text{C-NMR}$  Compound 8h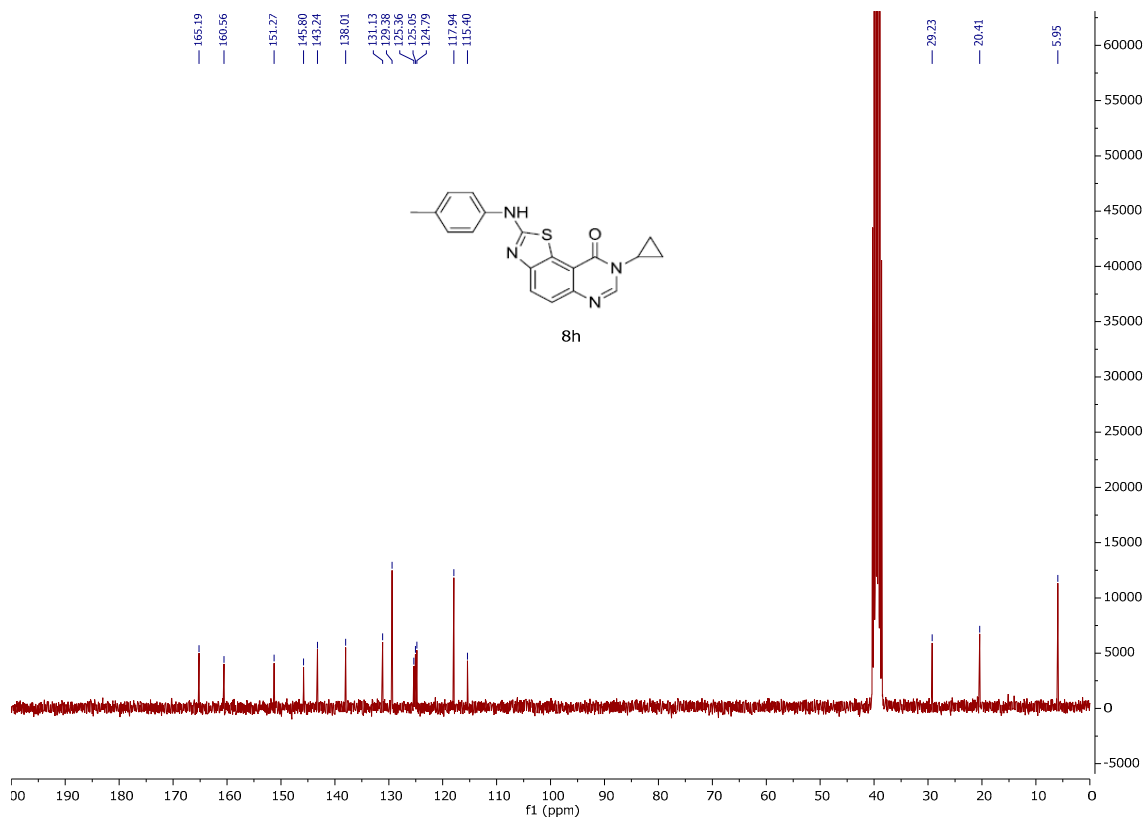

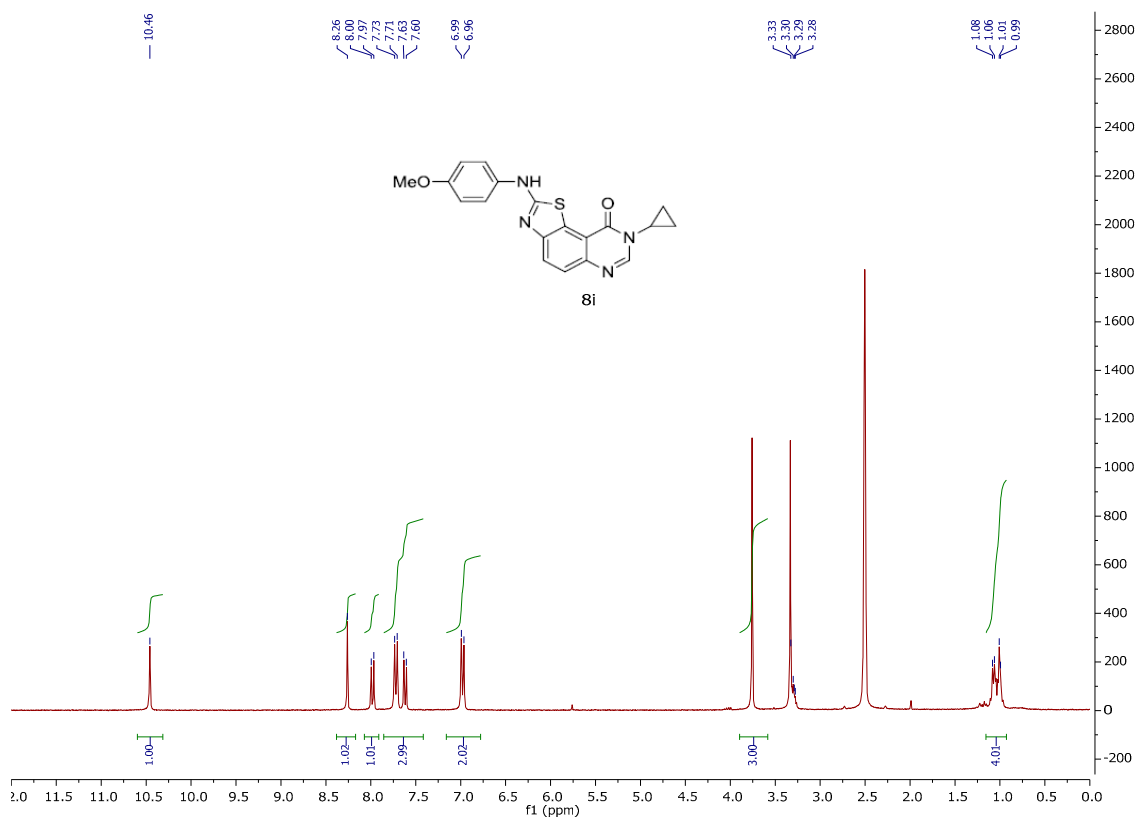Figure S27. <sup>1</sup>H-NMR and <sup>13</sup>C-NMR Compound 8i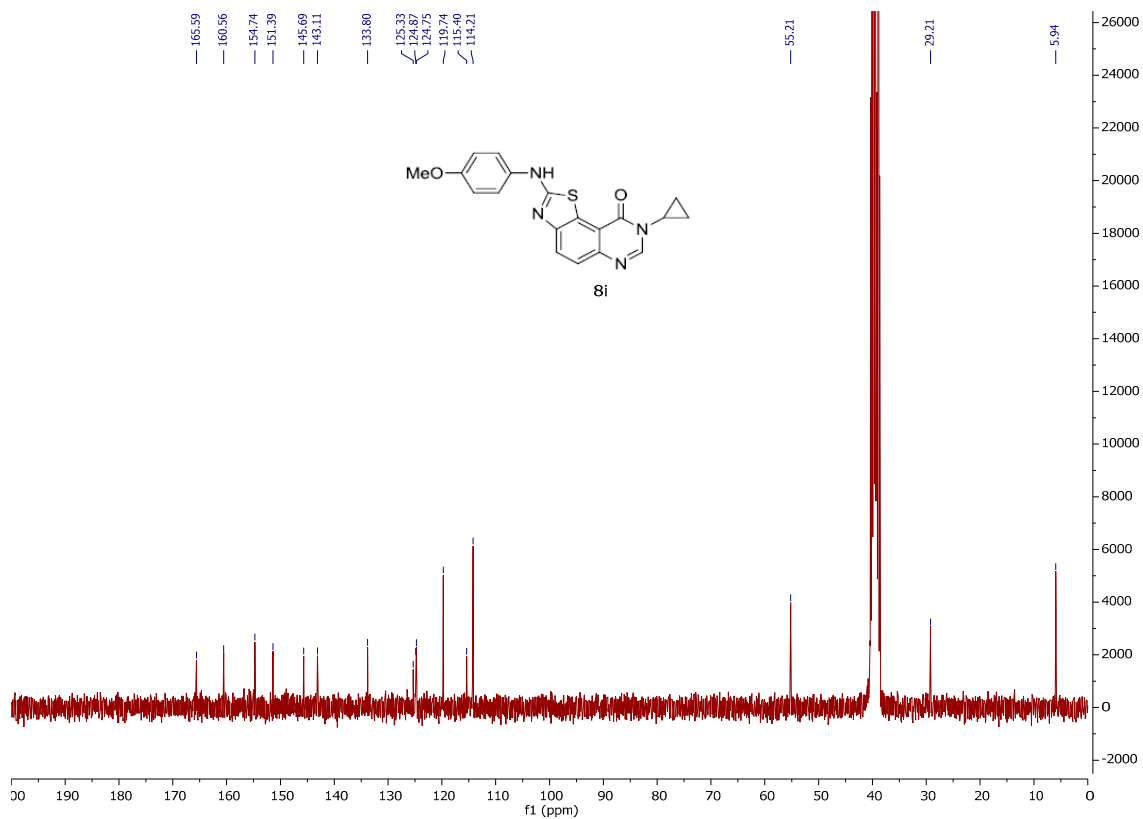

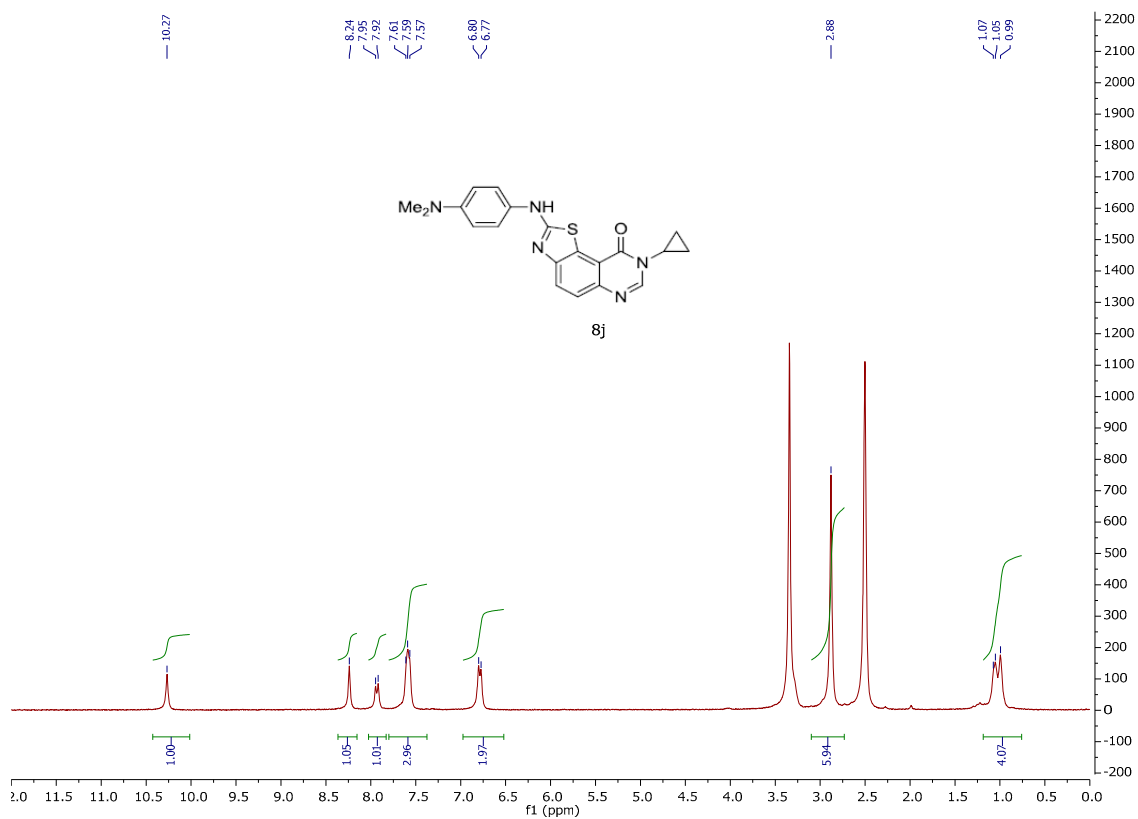Figure S28. <sup>1</sup>H-NMR and <sup>13</sup>C-NMR Compound 8j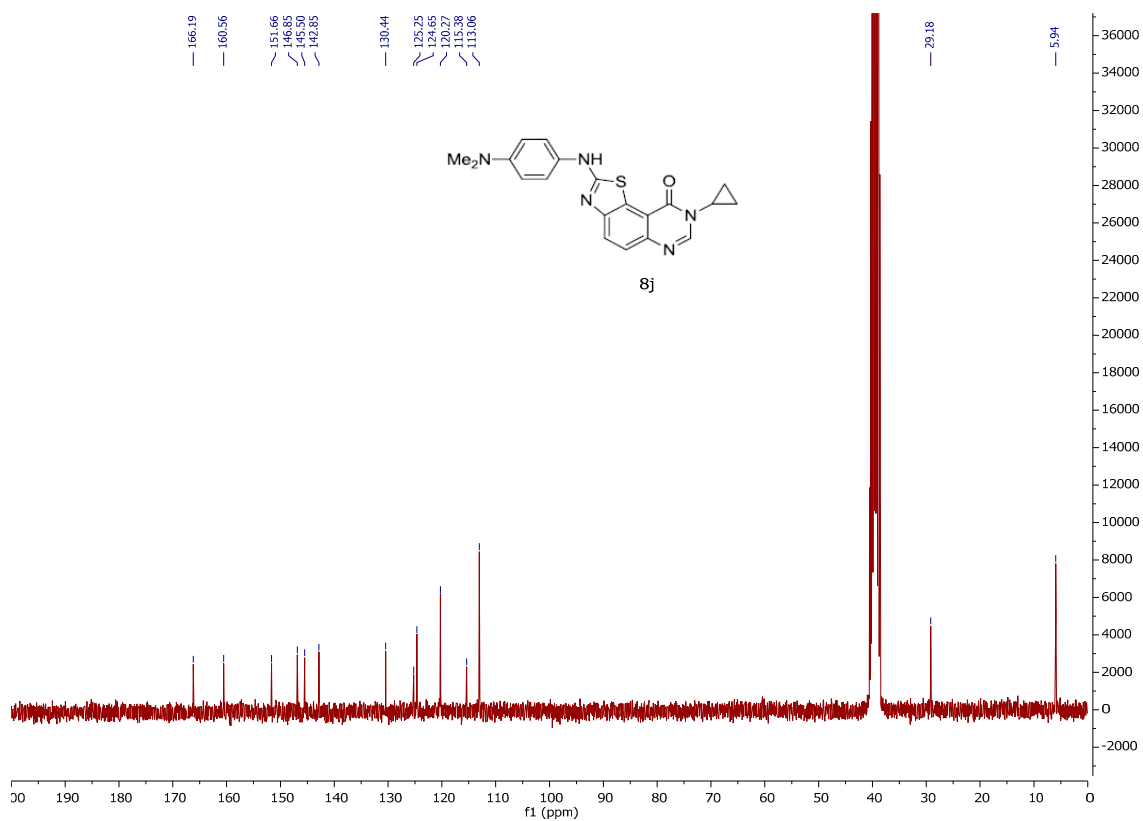

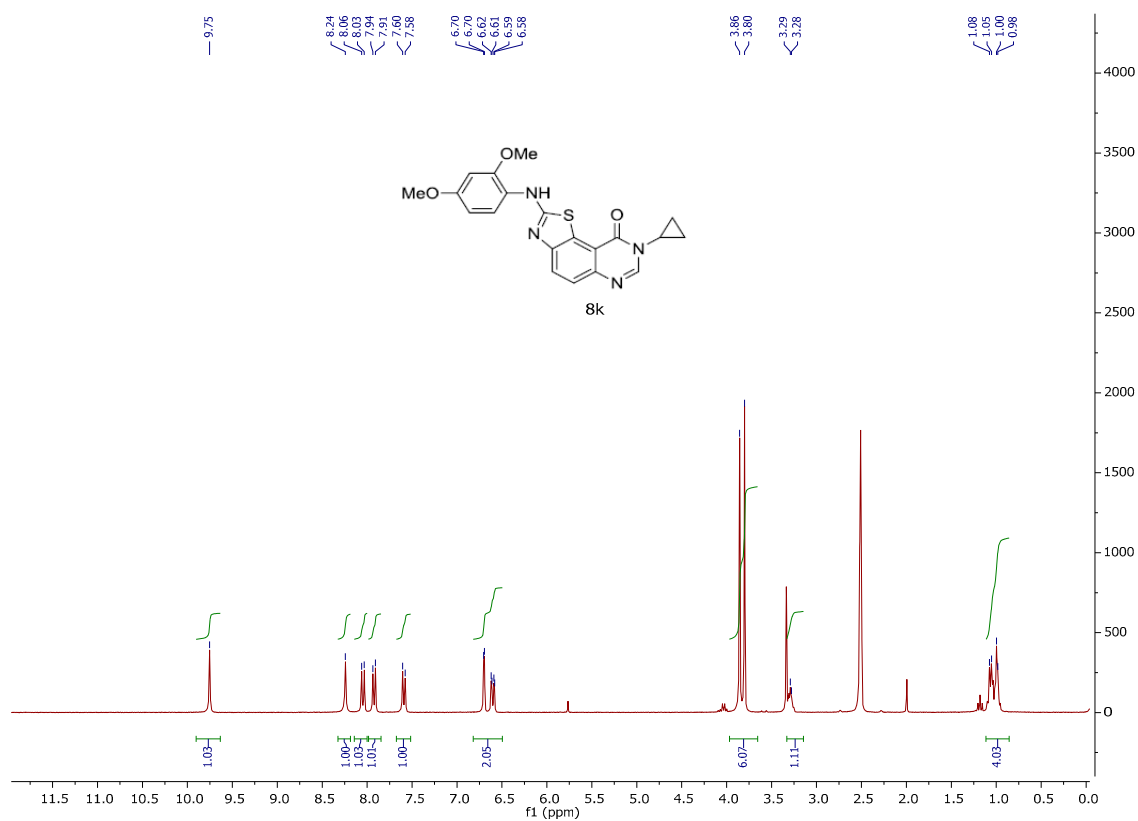Figure S29.  $^1\text{H-NMR}$  and  $^{13}\text{C-NMR}$  Compound 8k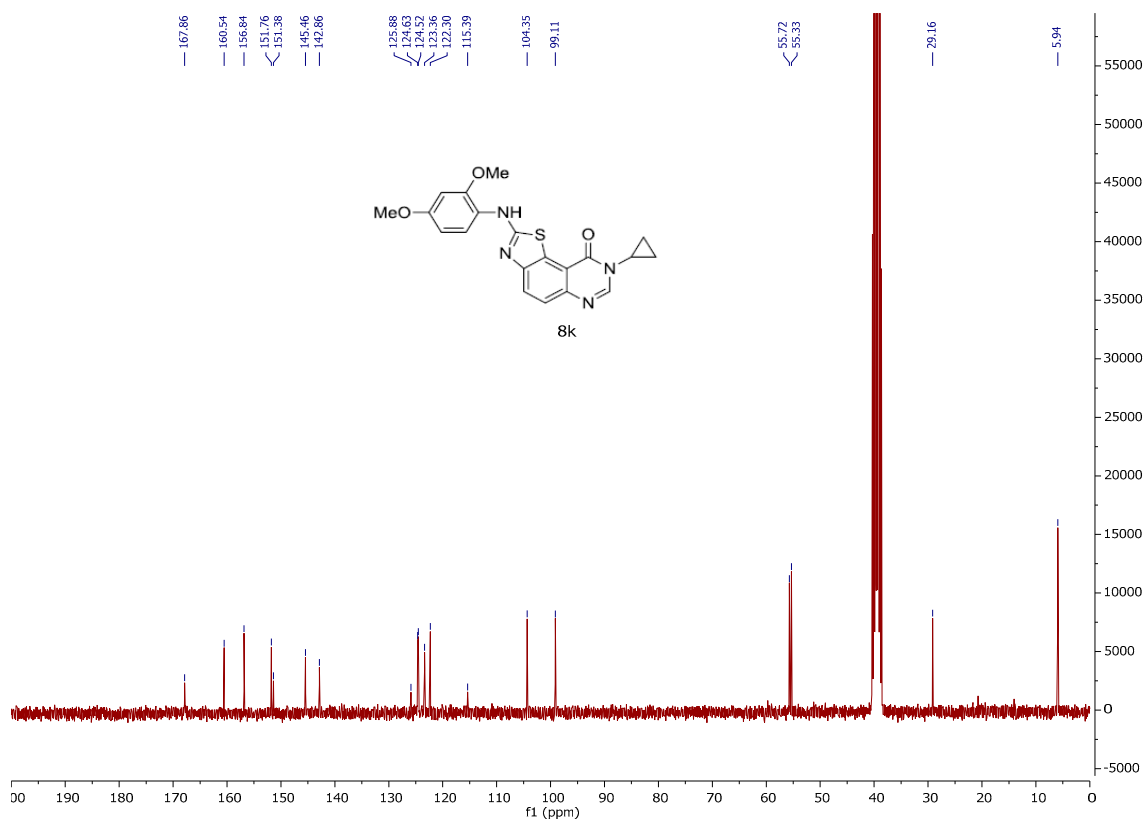

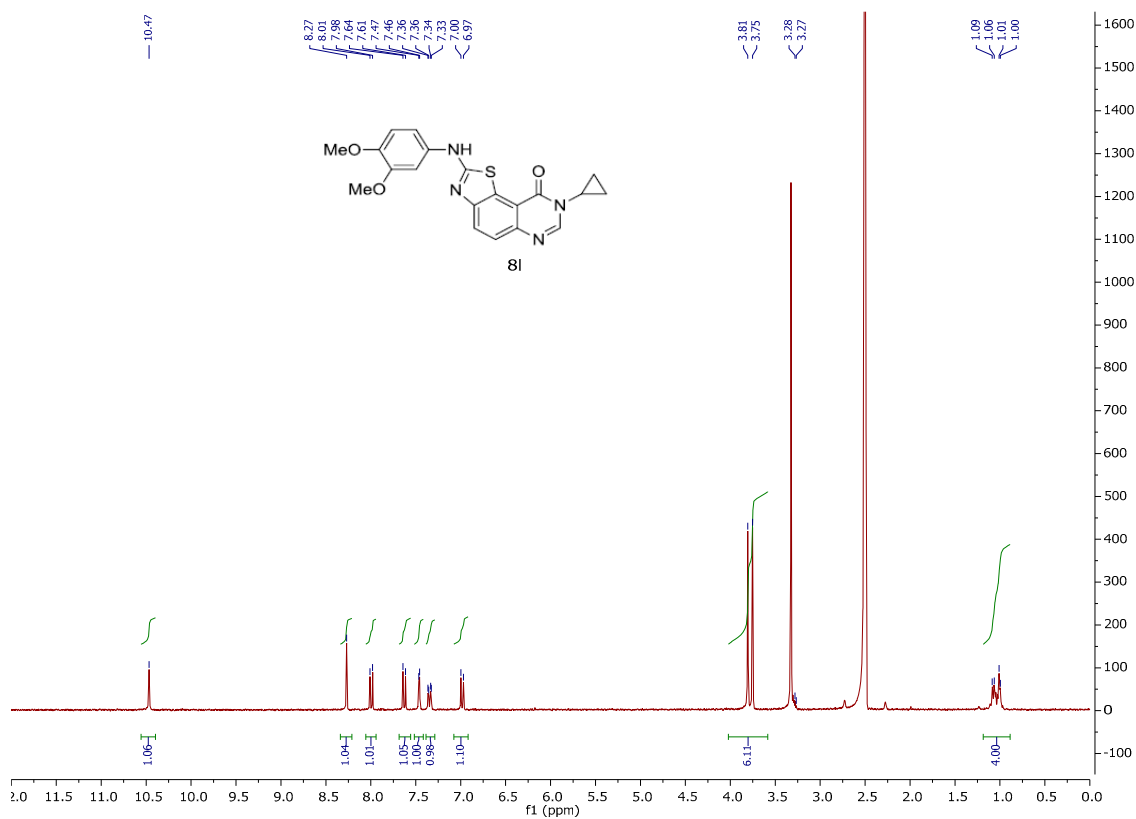

**Figure S30.**  $^1\text{H-NMR}$  and  $^{13}\text{C-NMR}$  Compound **8I**

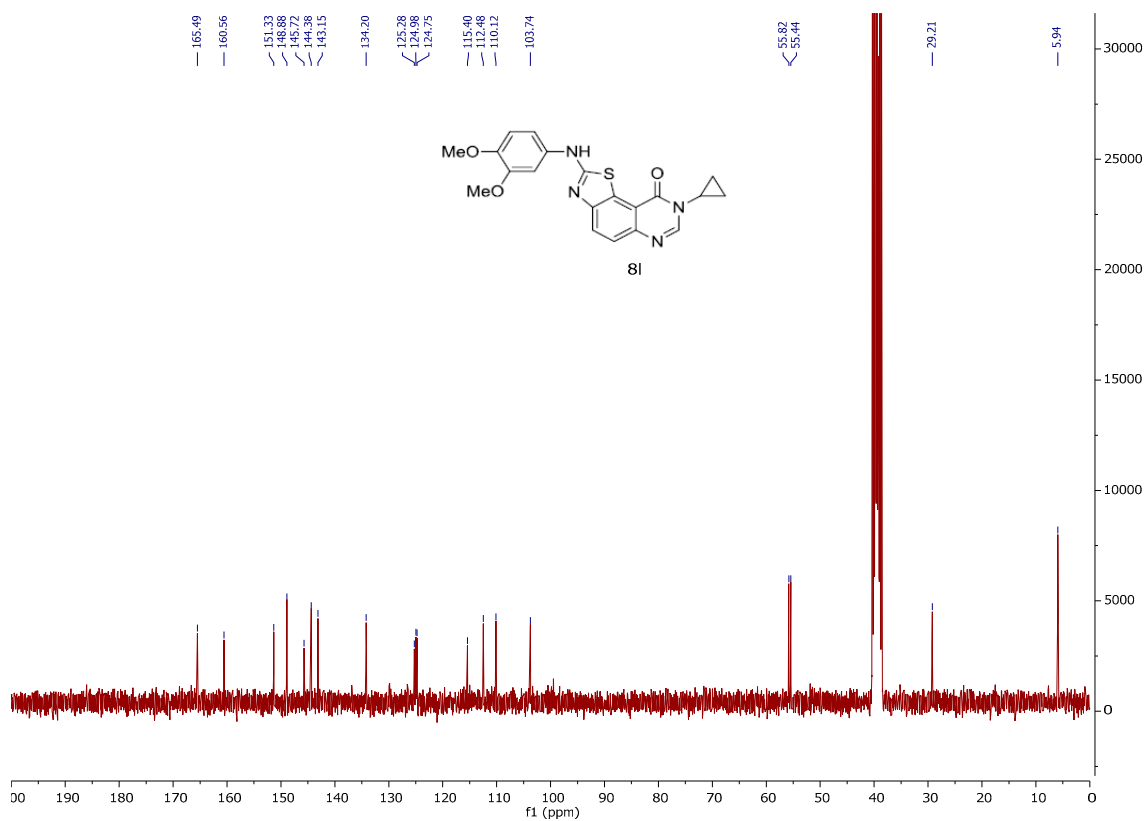

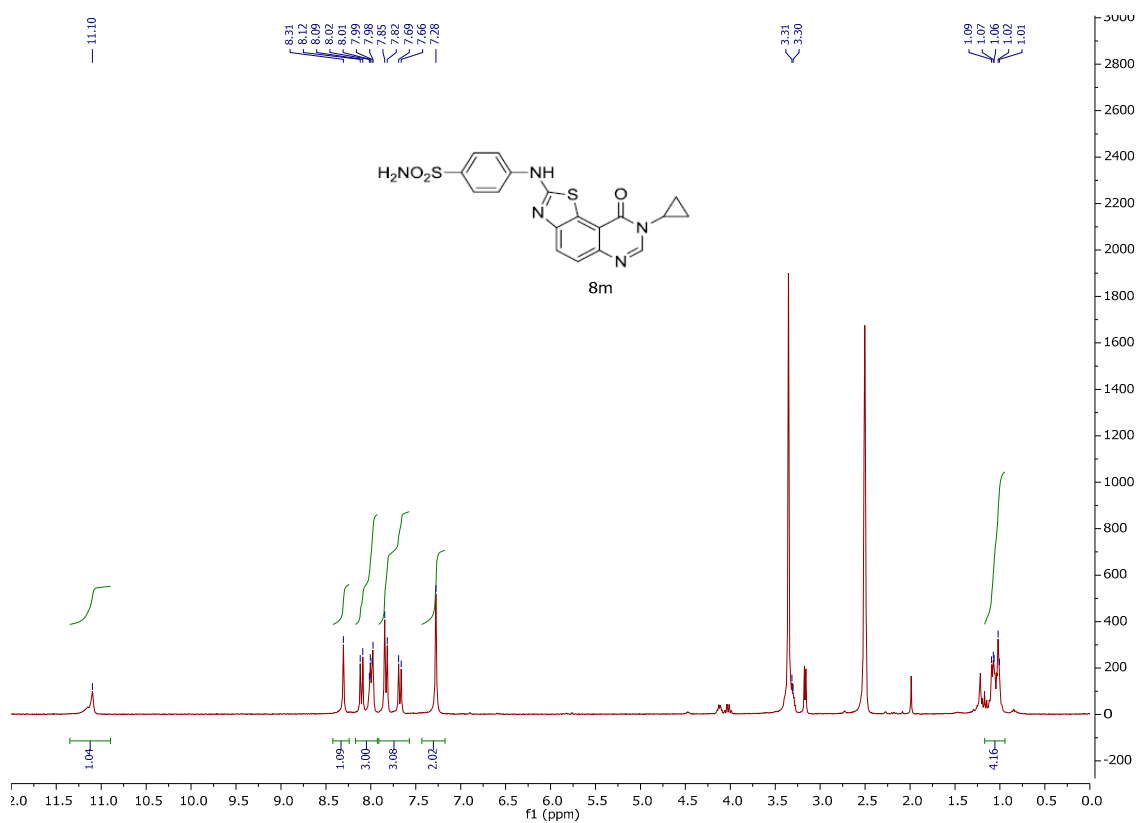Figure S31.  $^1\text{H-NMR}$  and  $^{13}\text{C-NMR}$  Compound 8m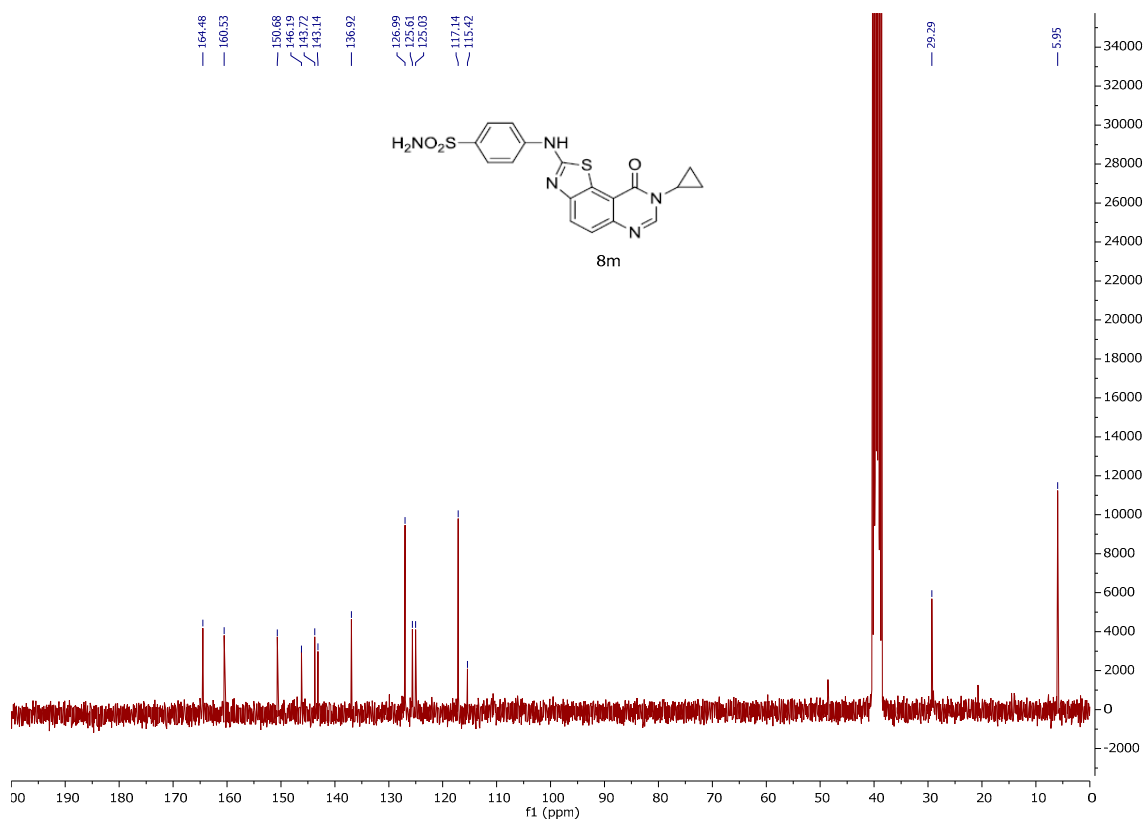

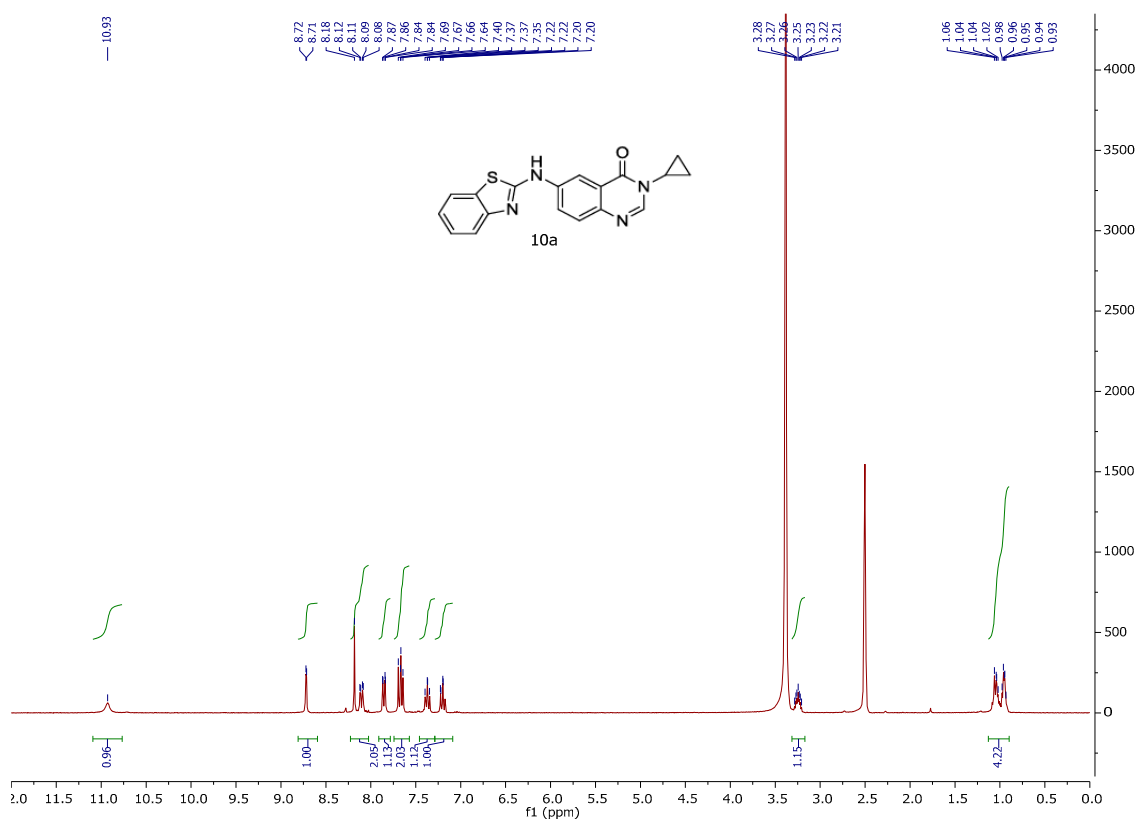Figure S32. <sup>1</sup>H-NMR and <sup>13</sup>C-NMR Compound 10a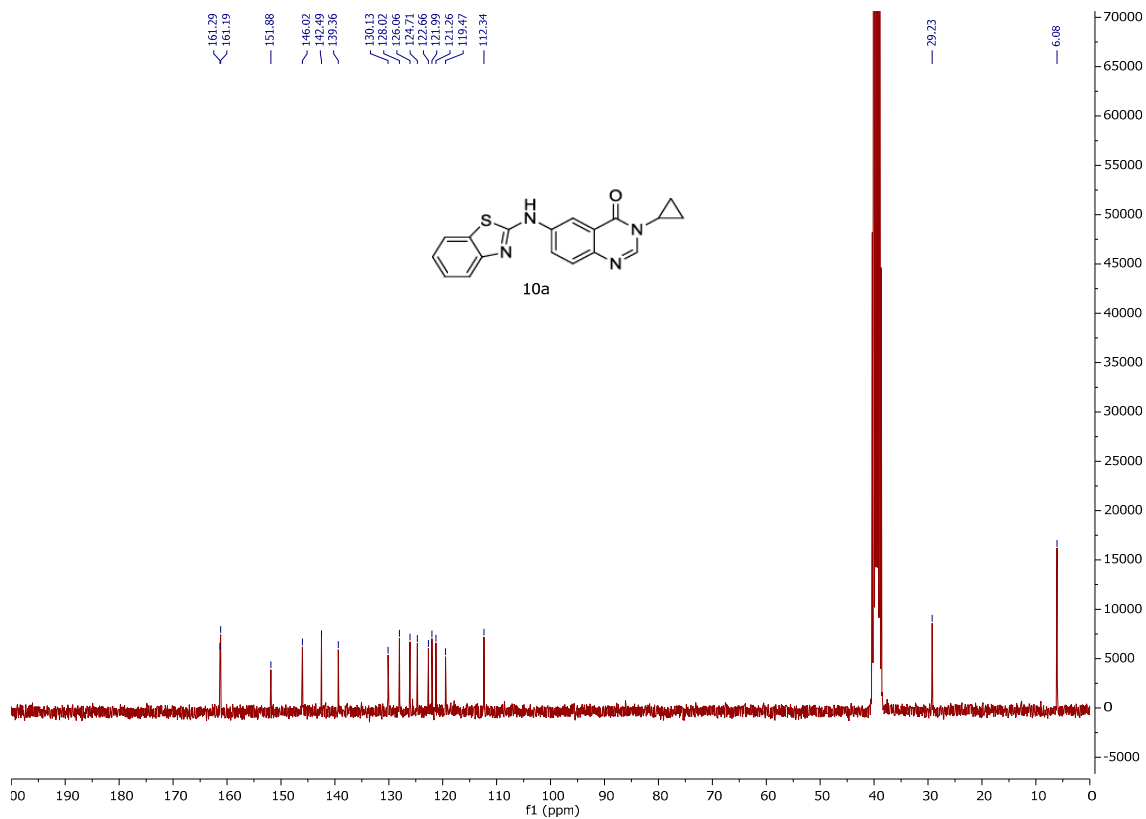



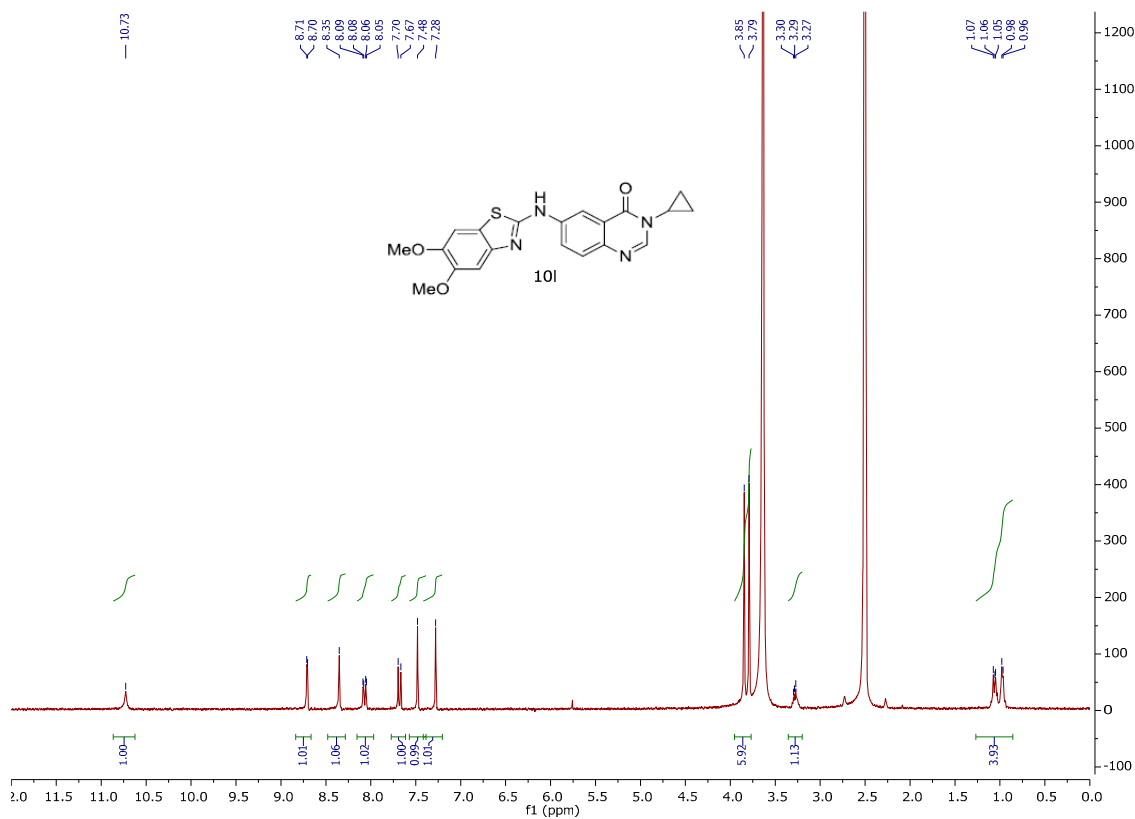Figure S33. <sup>1</sup>H-NMR and <sup>13</sup>C-NMR Compound 10I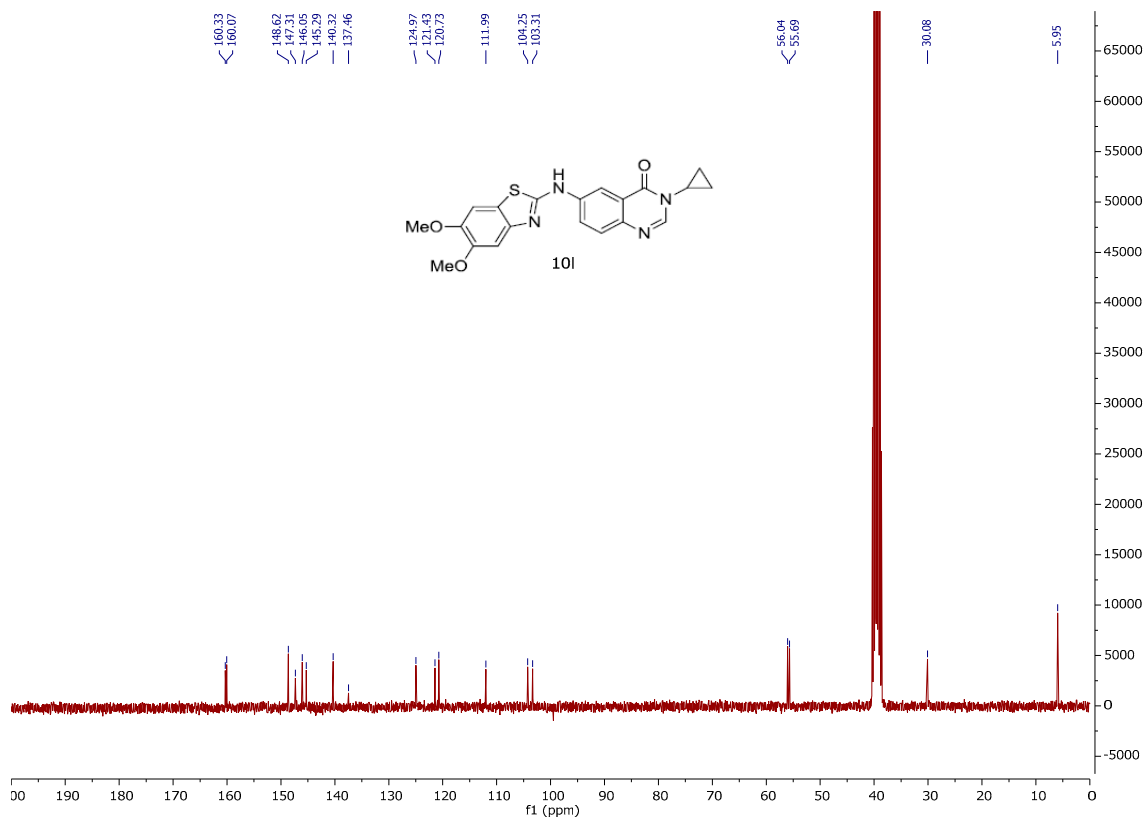

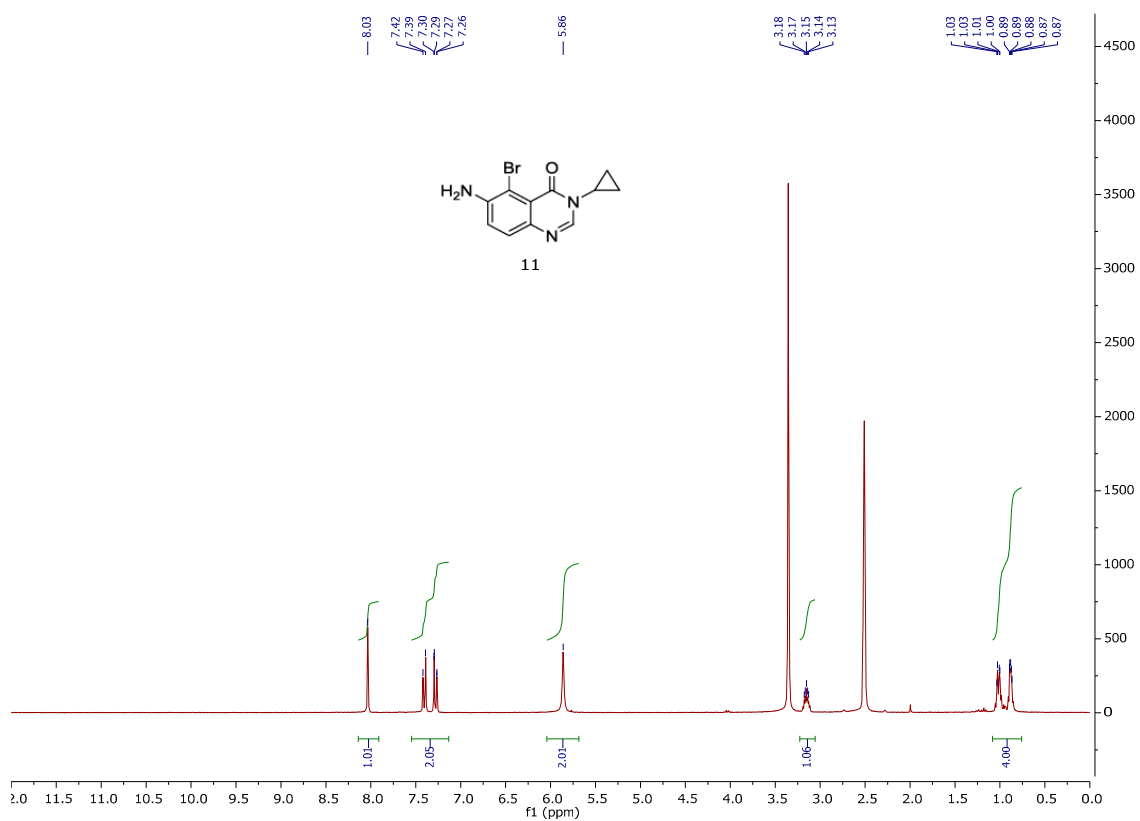Figure S34. <sup>1</sup>H-NMR and <sup>13</sup>C-NMR Compound 11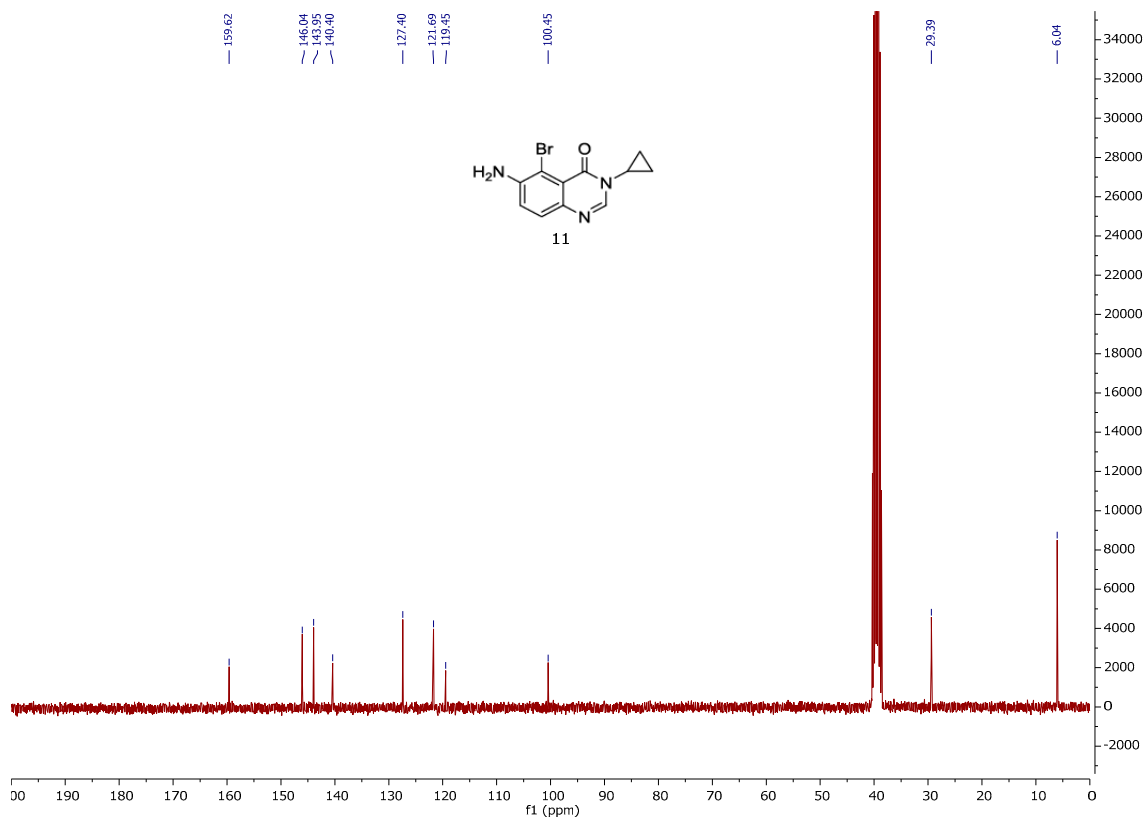

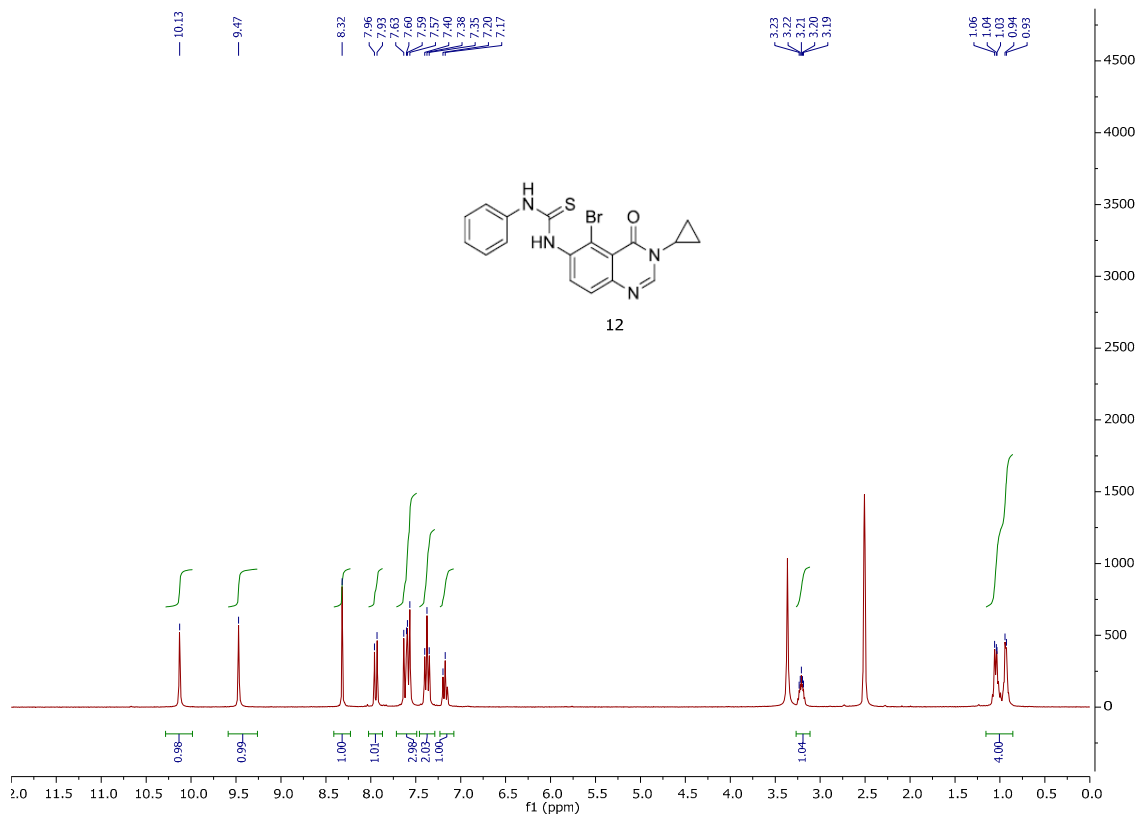

**Figure S35.**  $^1\text{H-NMR}$  and  $^{13}\text{C-NMR}$  Compound 12

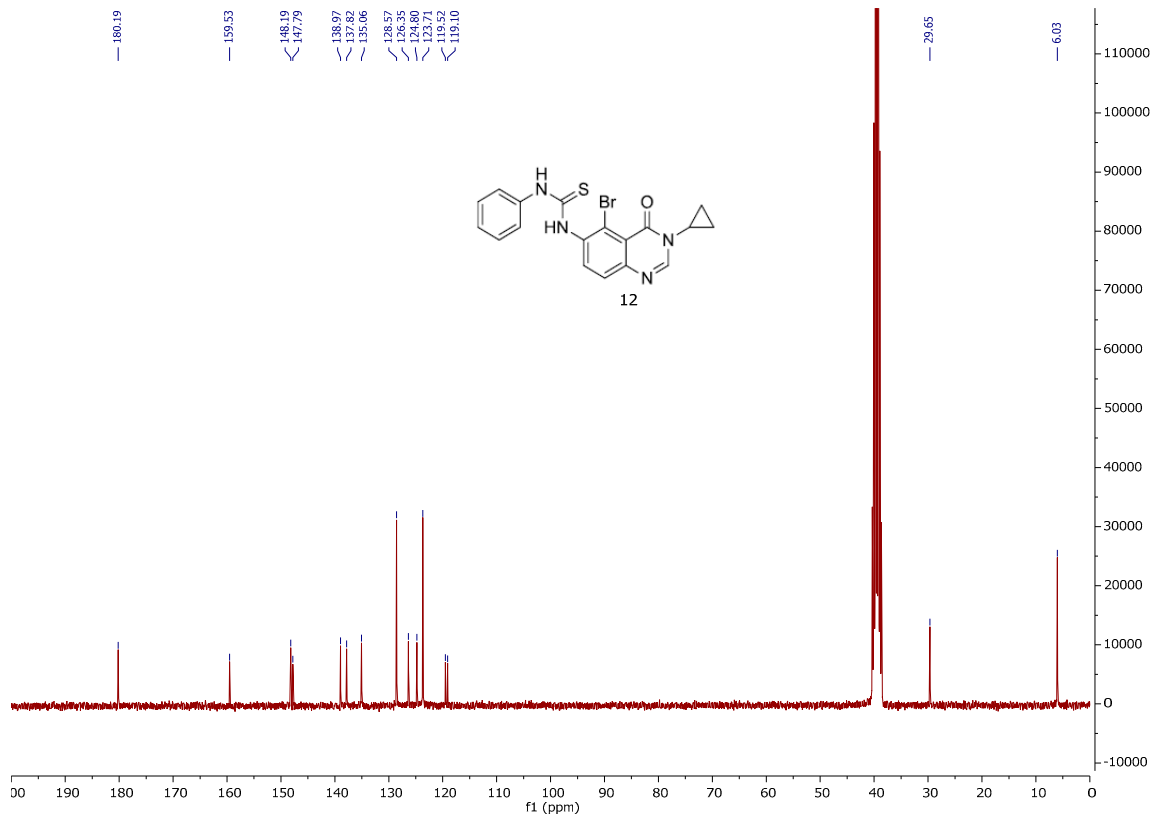

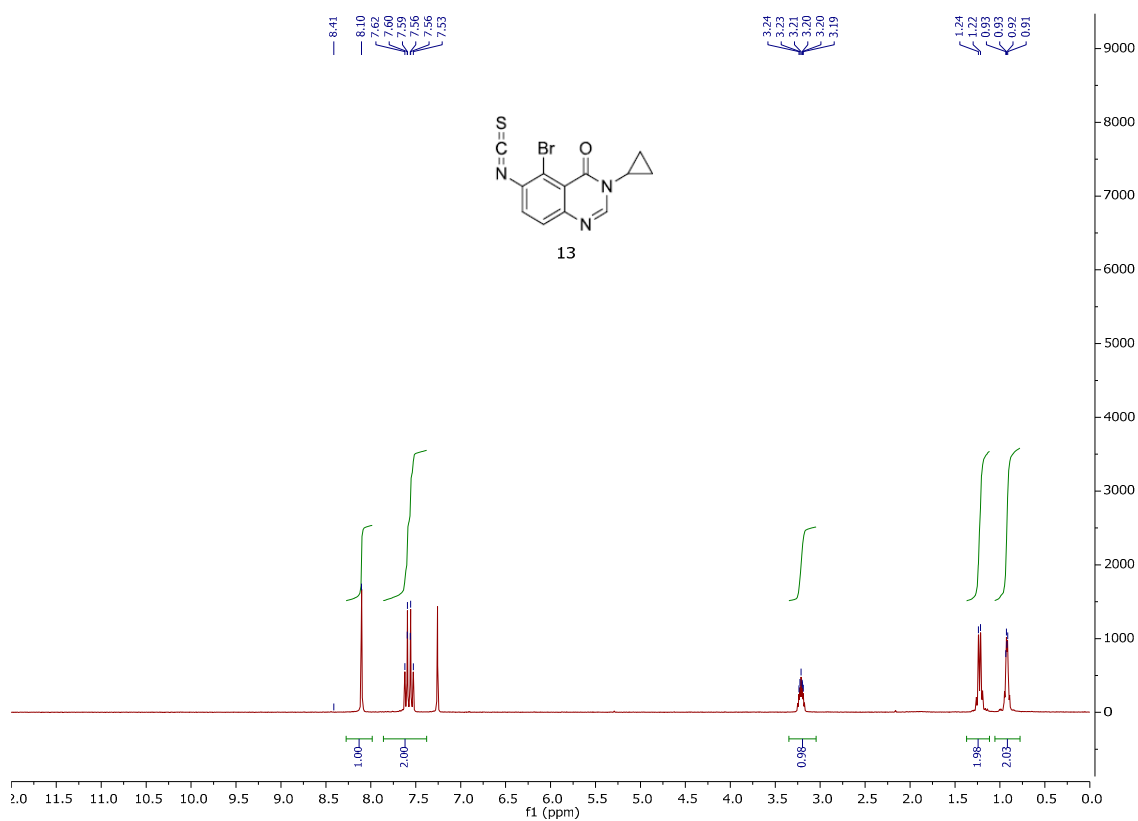Figure S36. <sup>1</sup>H-NMR and <sup>13</sup>C-NMR Compound 13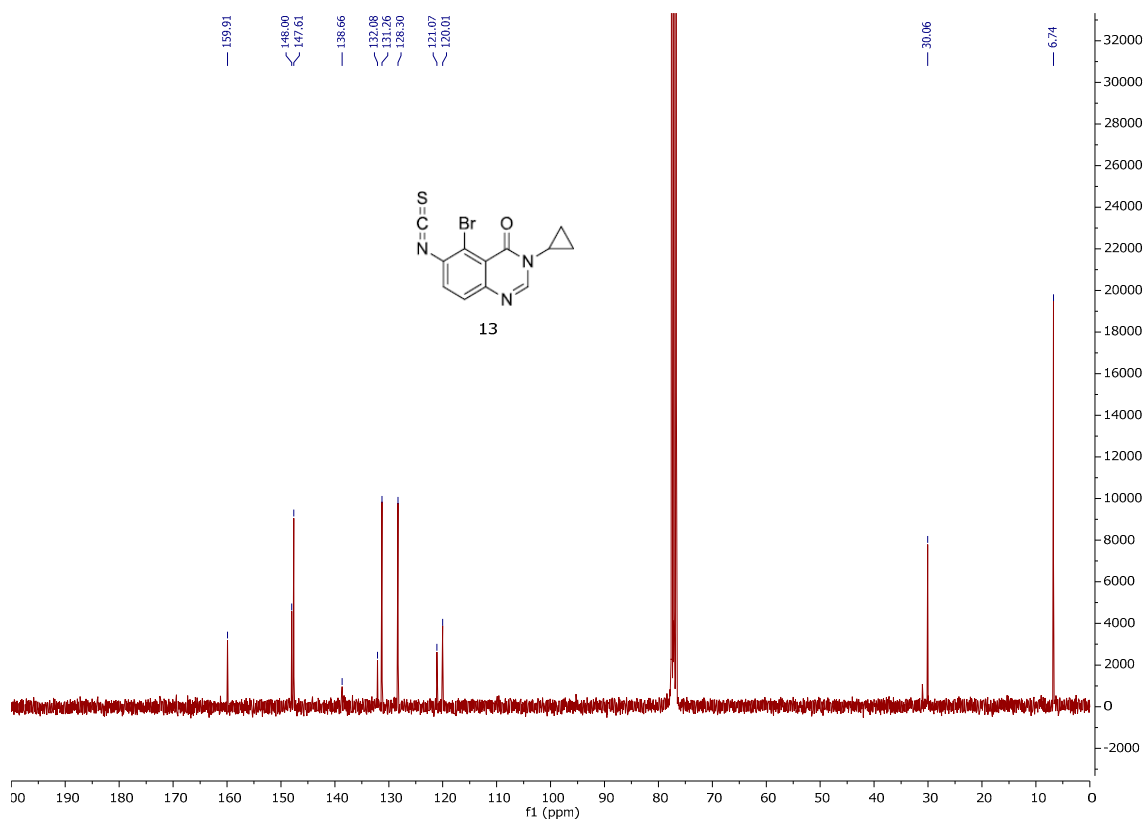

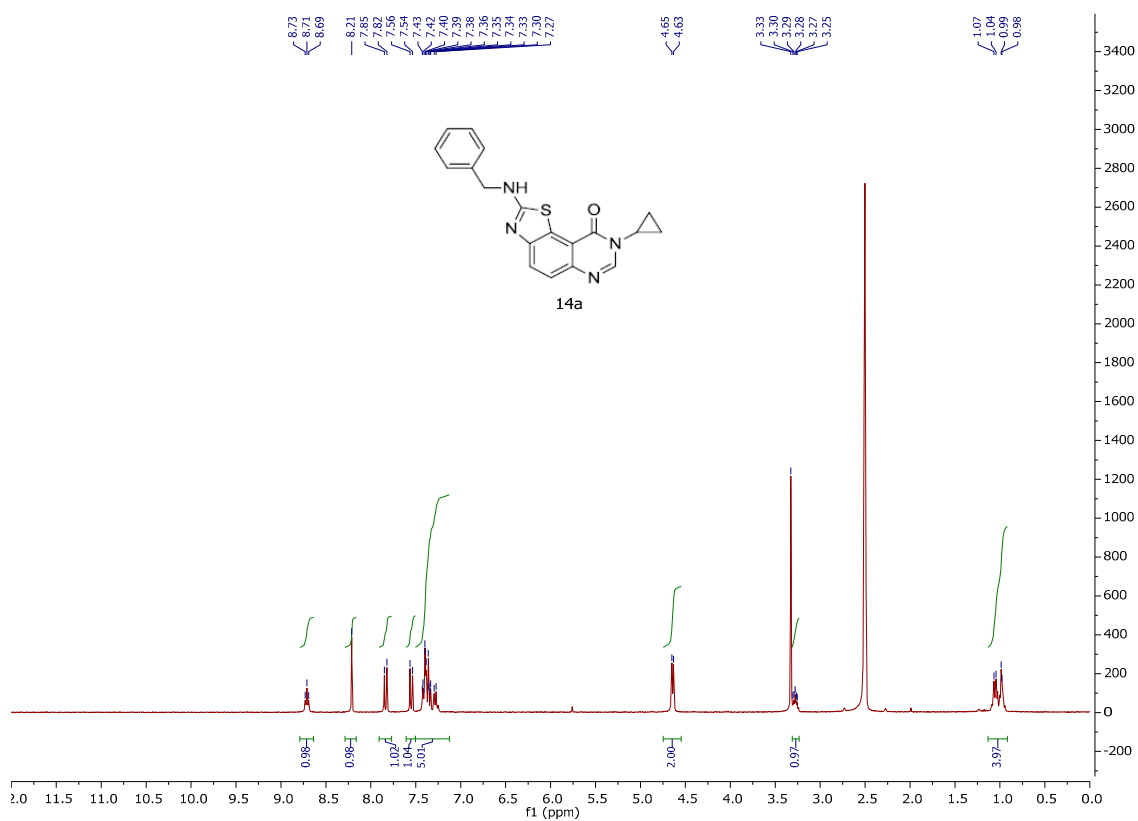Figure S37. <sup>1</sup>H-NMR and <sup>13</sup>C-NMR Compound 14a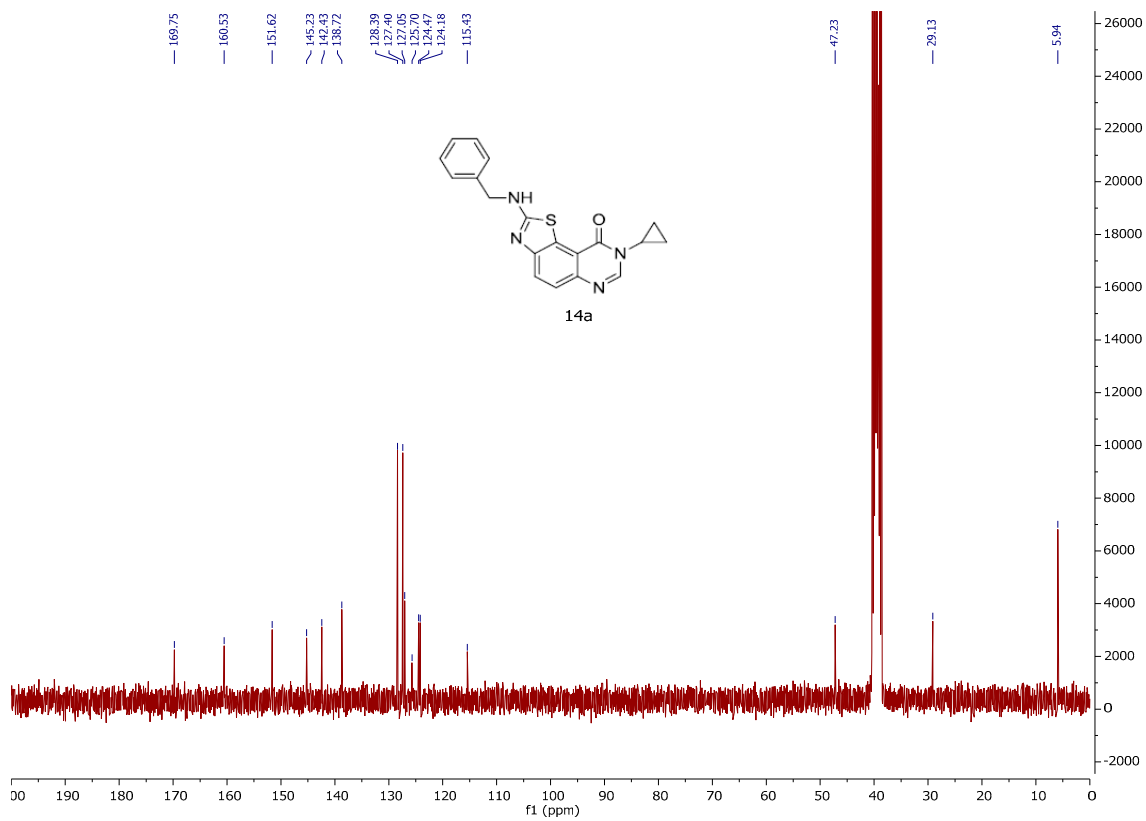

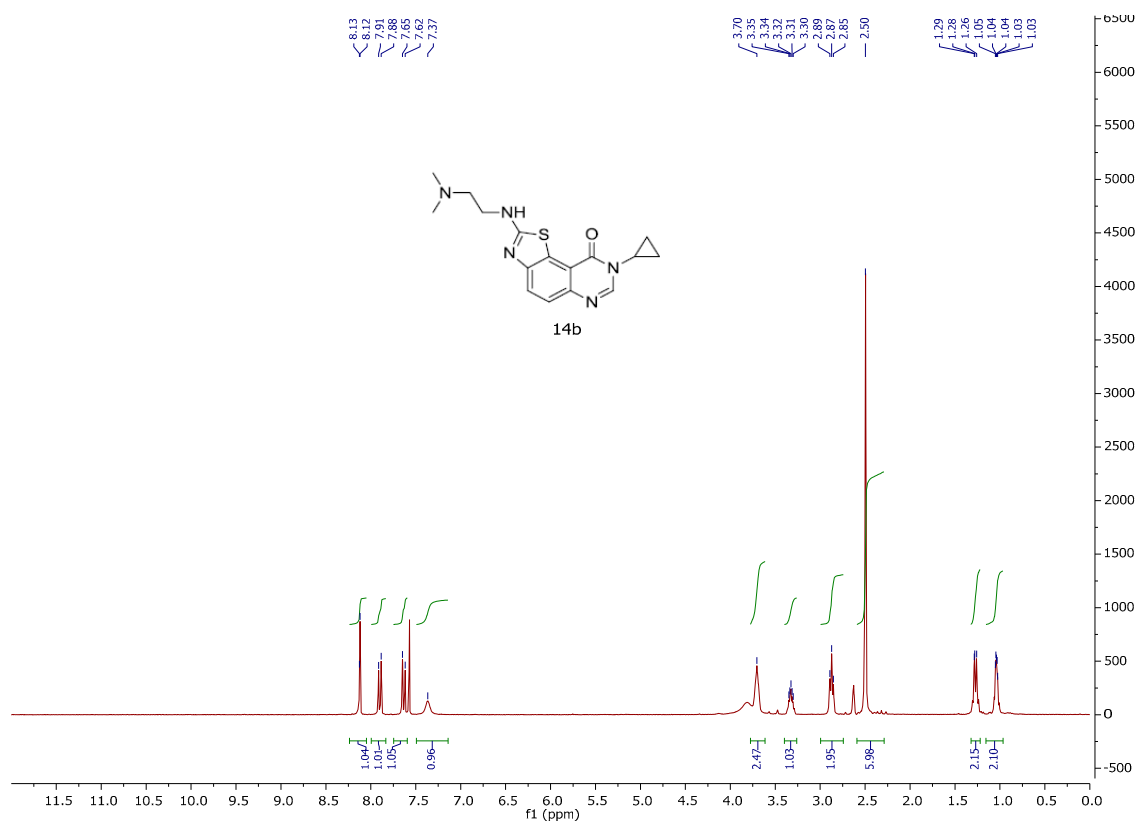Figure S38.  $^1\text{H}$ -NMR and  $^{13}\text{C}$ -NMR Compound 14b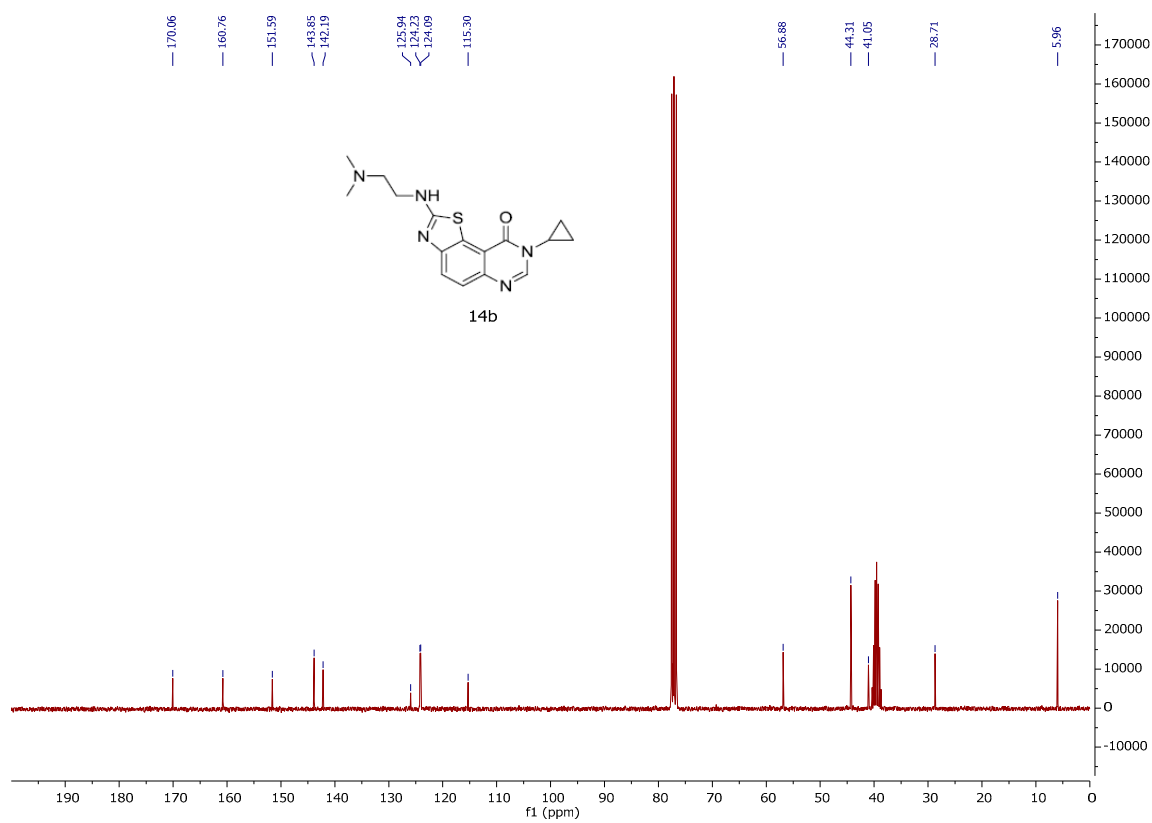

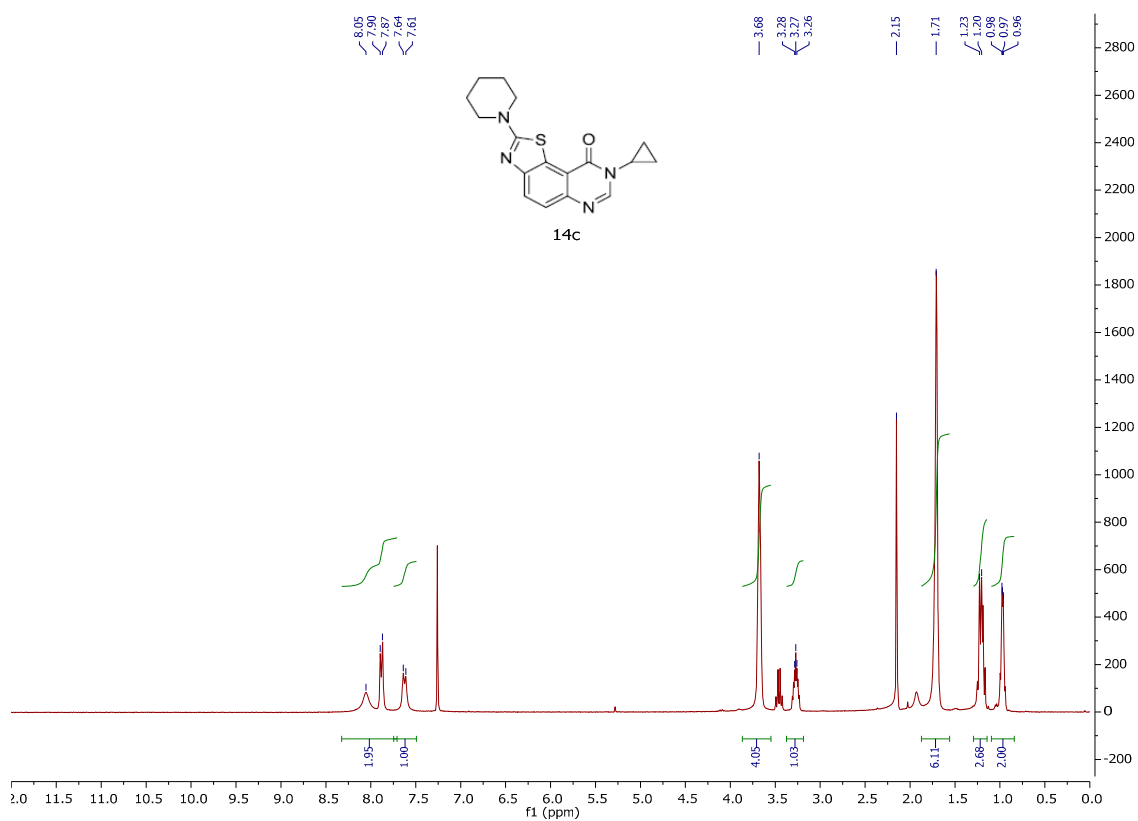Figure S39. <sup>1</sup>H-NMR and <sup>13</sup>C-NMR Compound 14c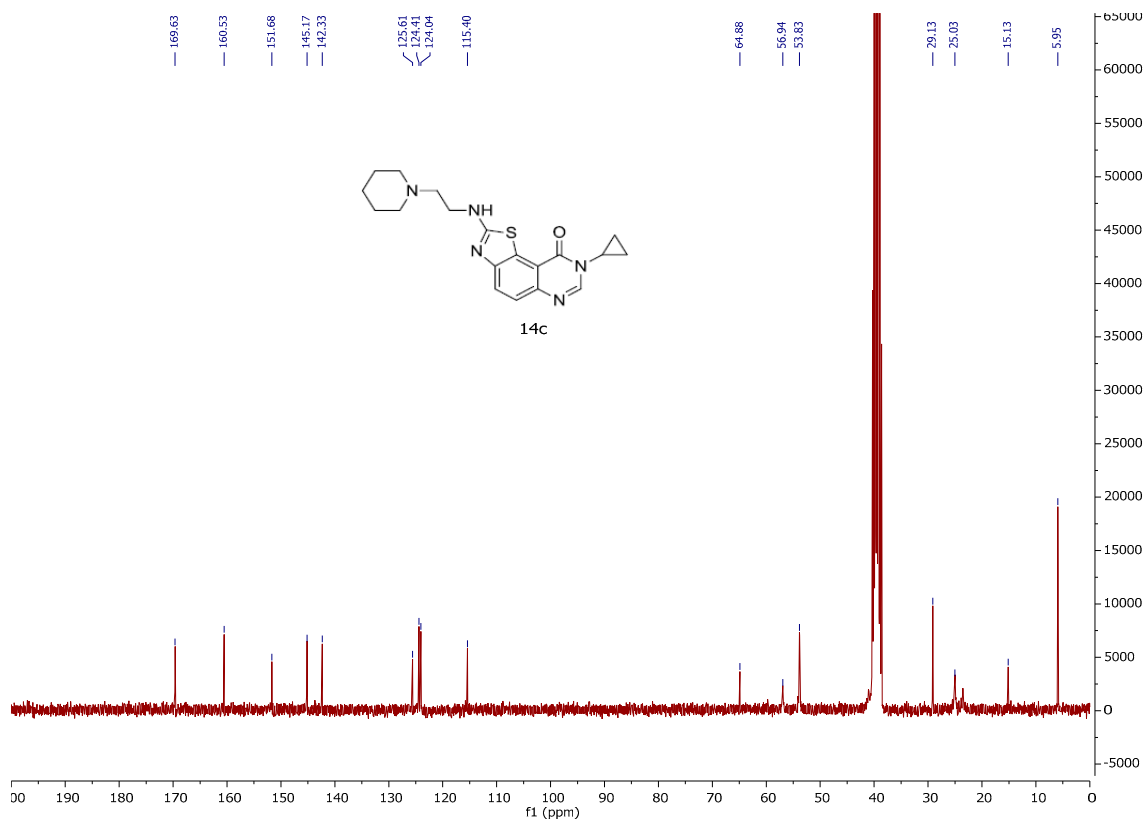

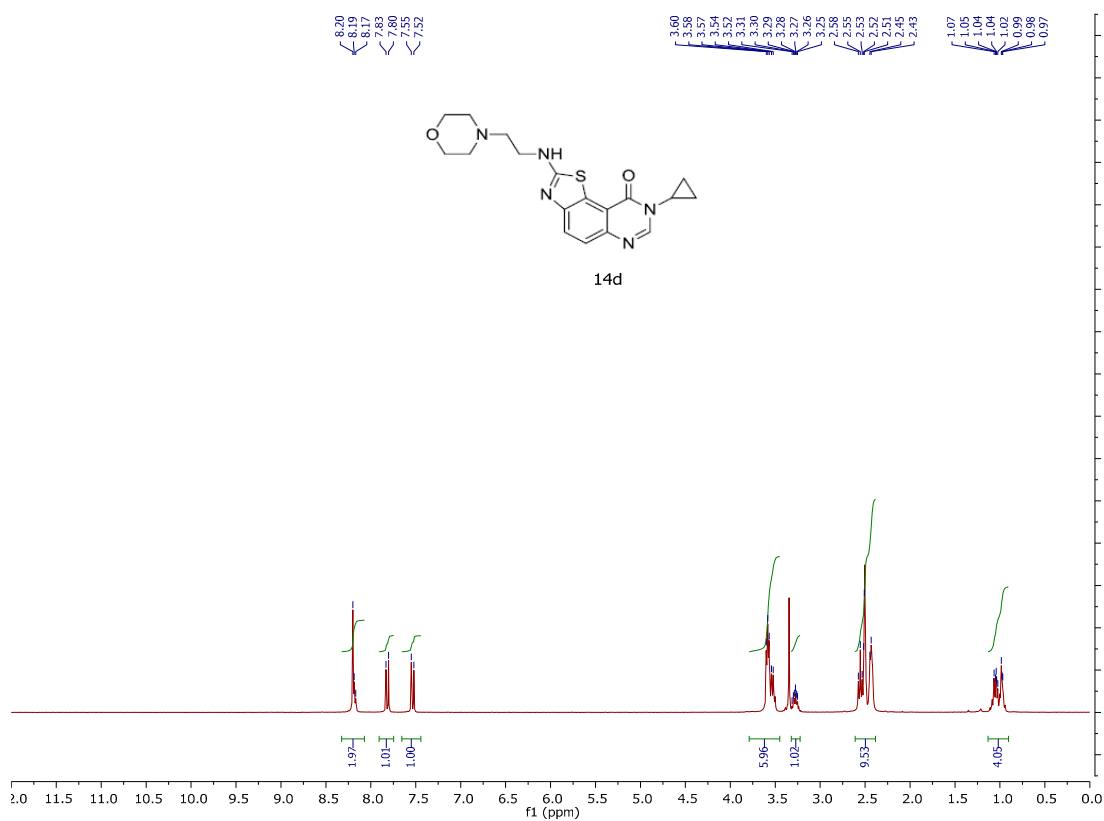Figure S40. <sup>1</sup>H-NMR and <sup>13</sup>C-NMR Compound 14d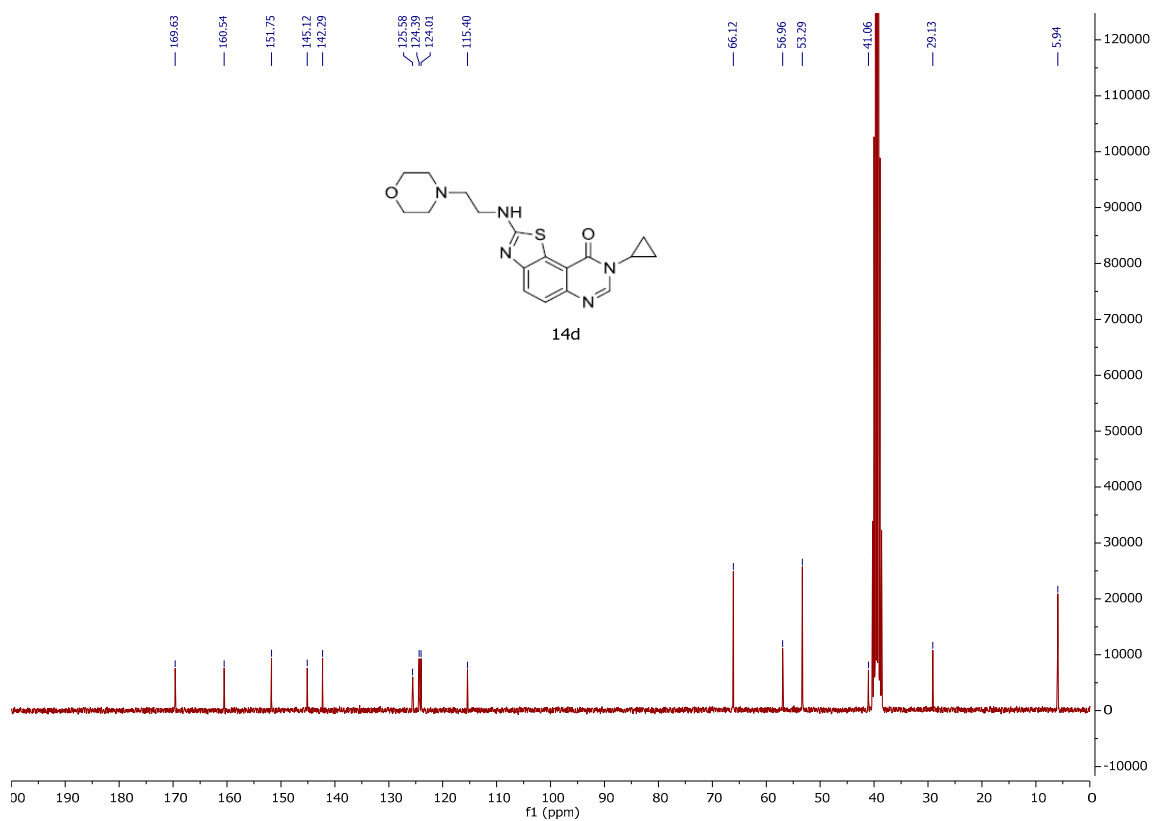



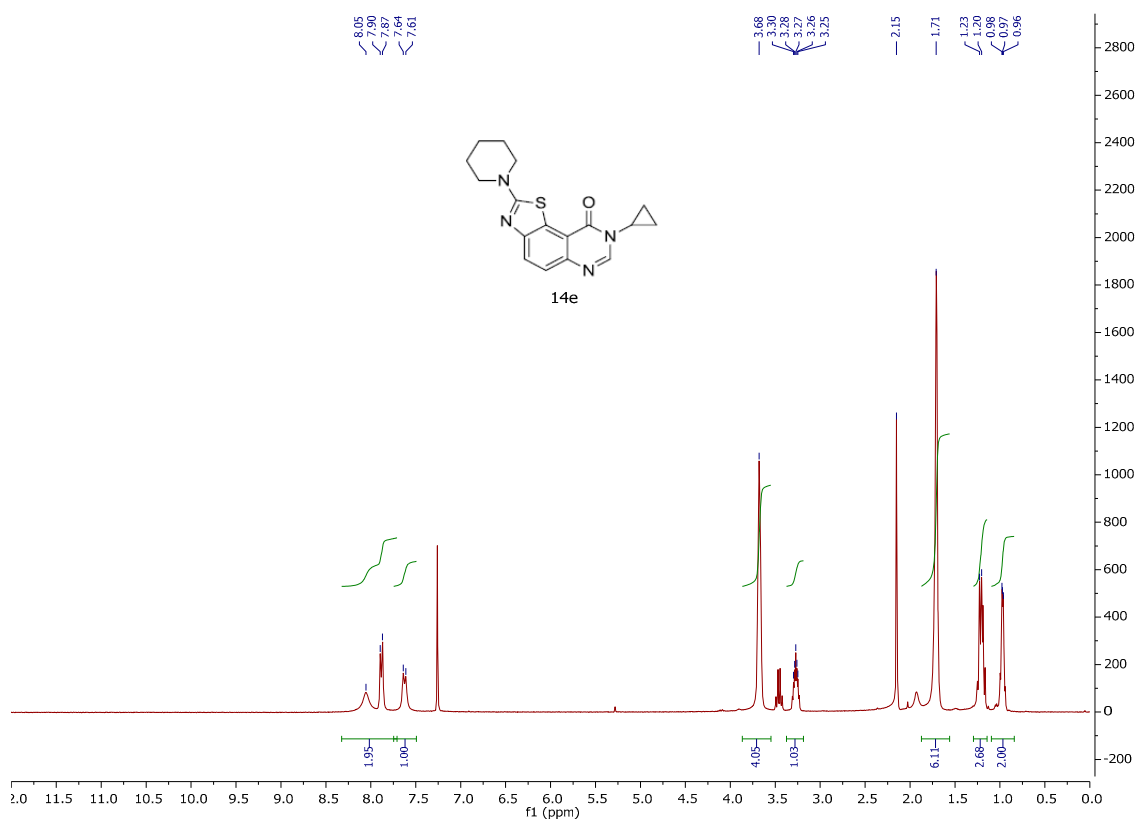Figure S41.  $^1\text{H}$ -NMR and  $^{13}\text{C}$ -NMR Compound 14e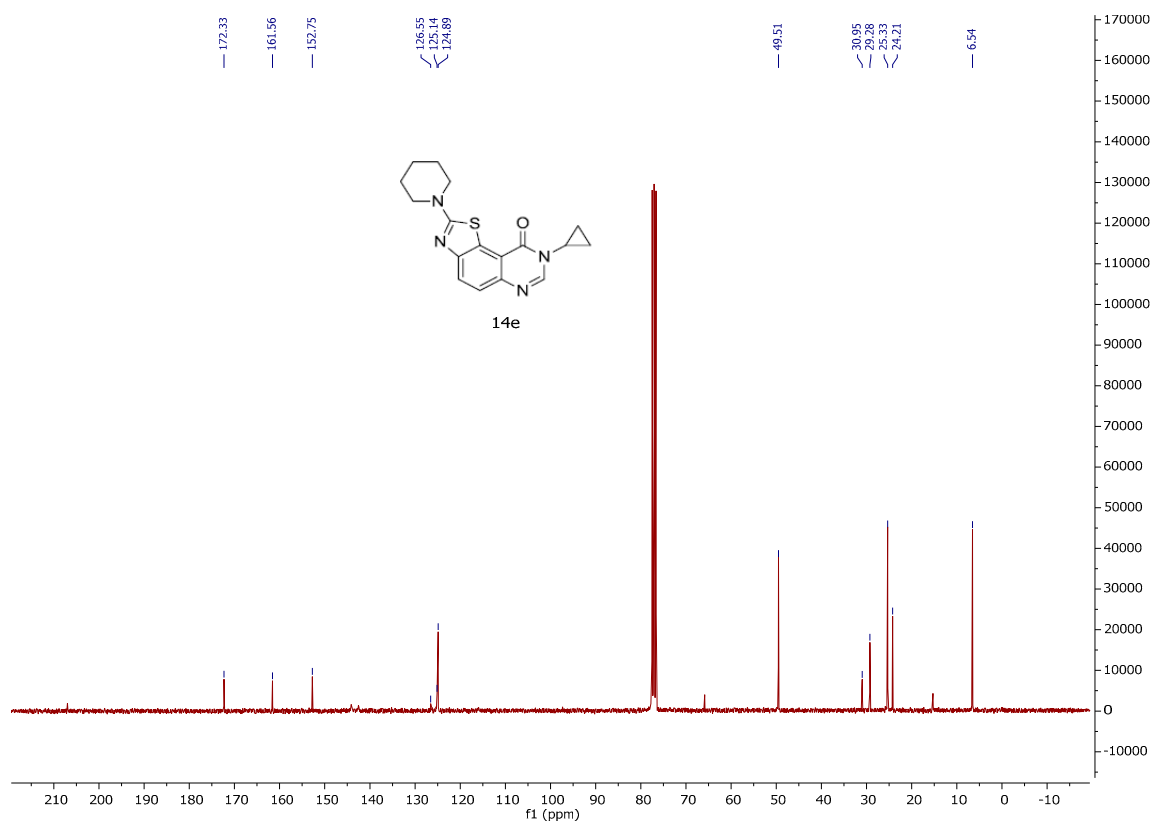

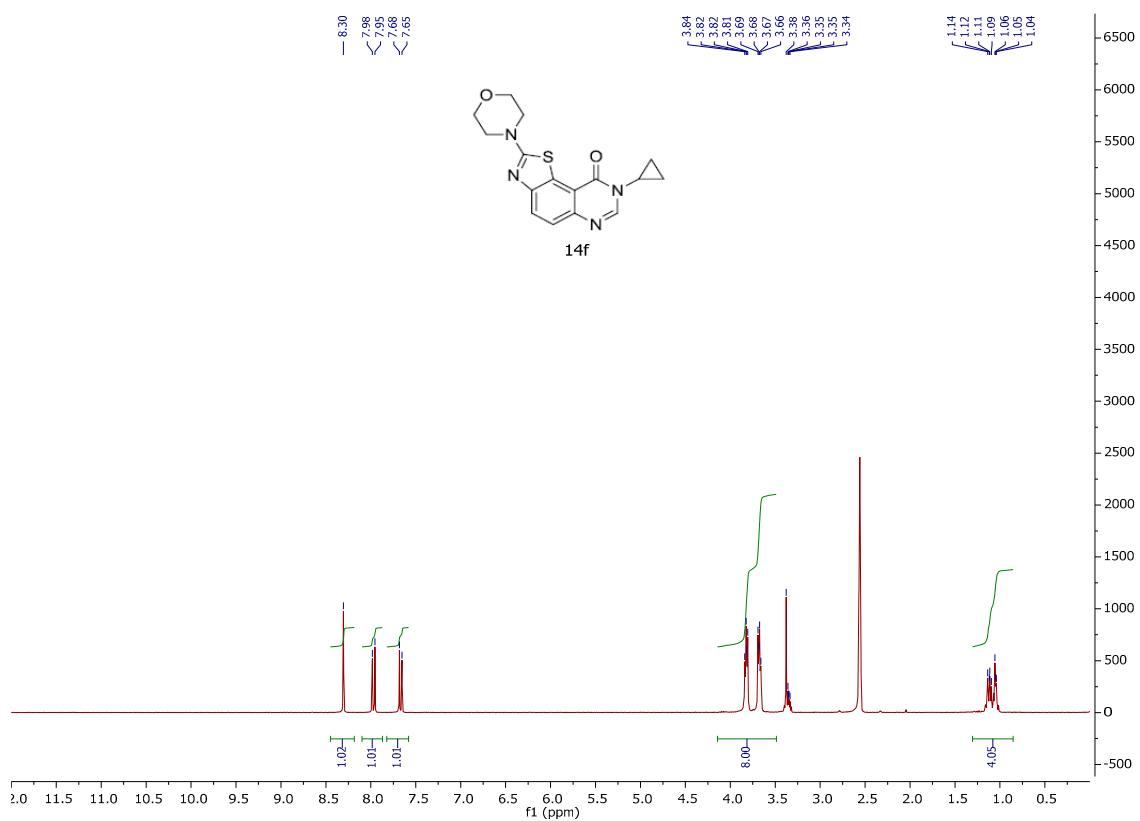Figure S42. <sup>1</sup>H-NMR and <sup>13</sup>C-NMR Compound 14f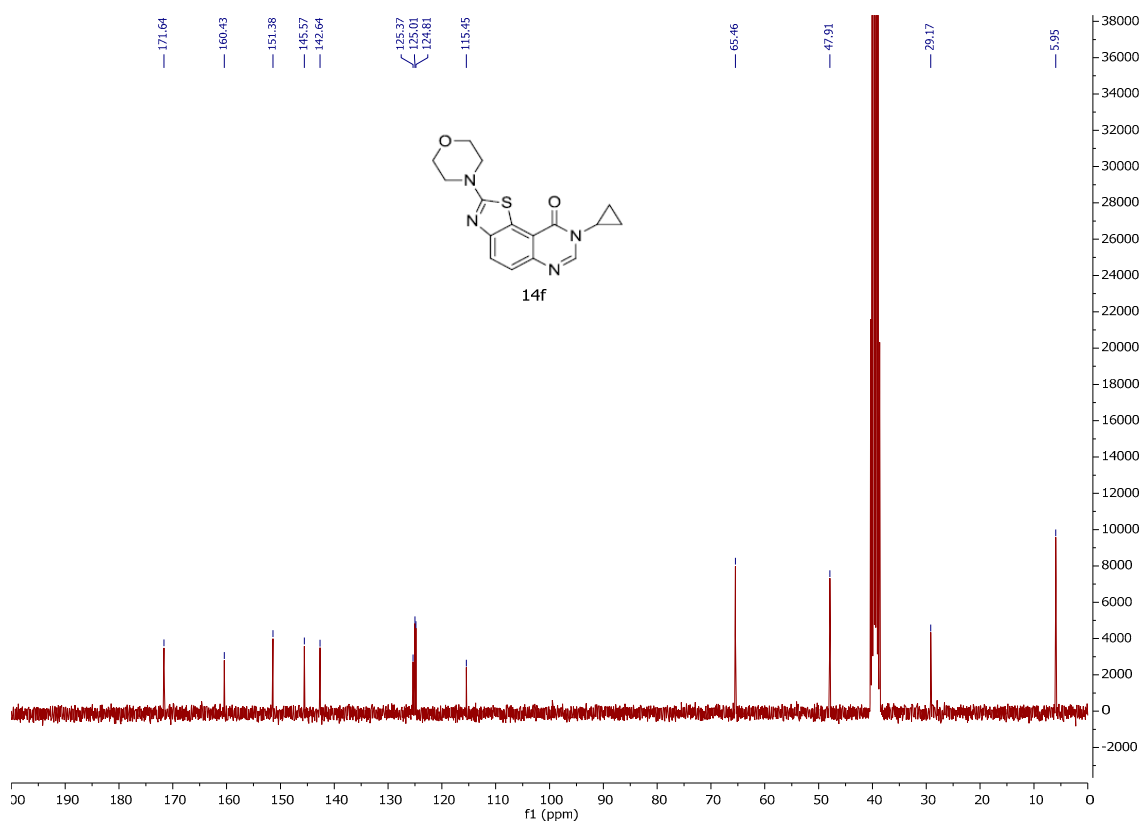

**Figure S43.**  $^1\text{H-NMR}$  and  $^{13}\text{C-NMR}$  Compound 15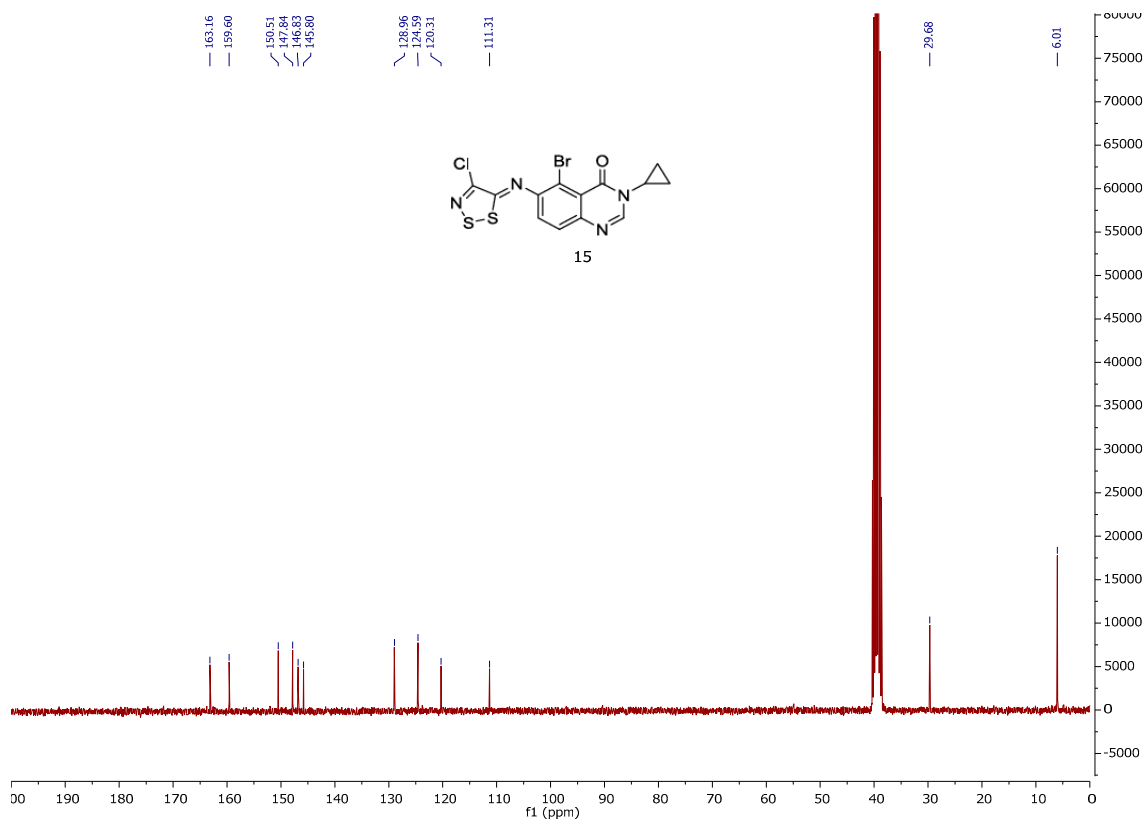

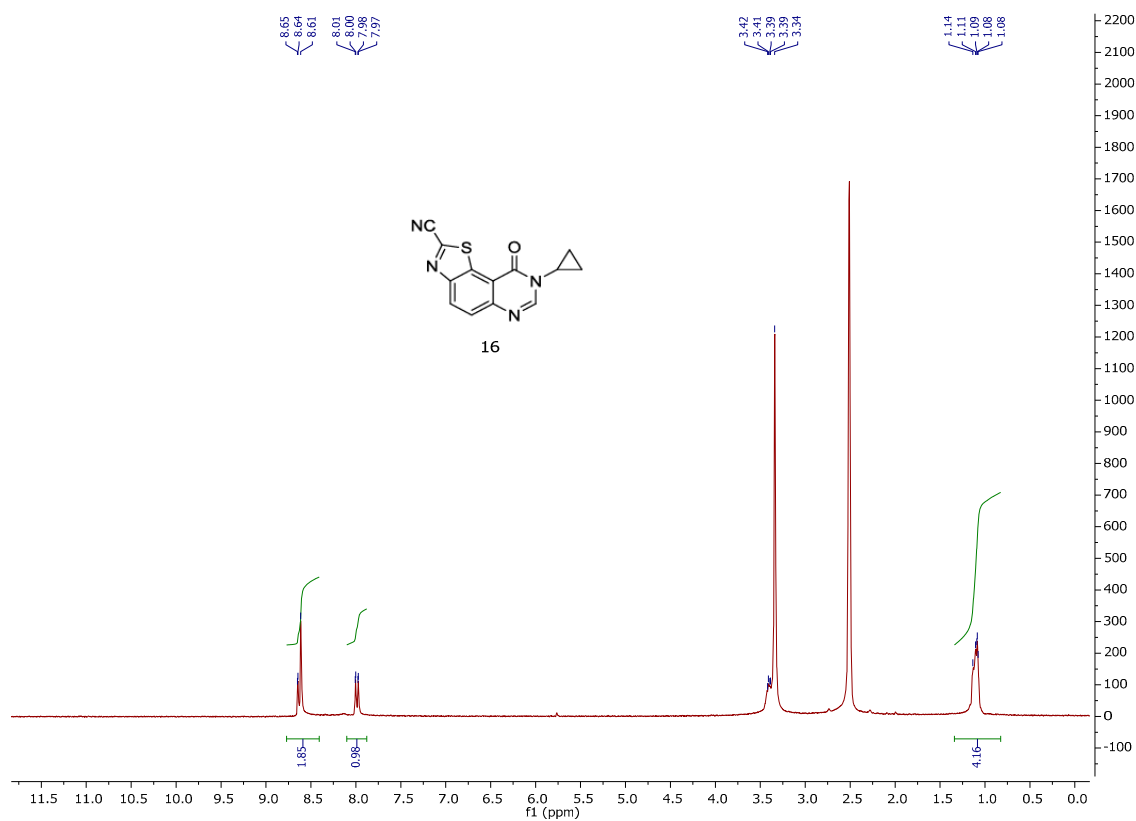Figure S44.  $^1\text{H}$ -NMR and  $^{13}\text{C}$ -NMR Compound 16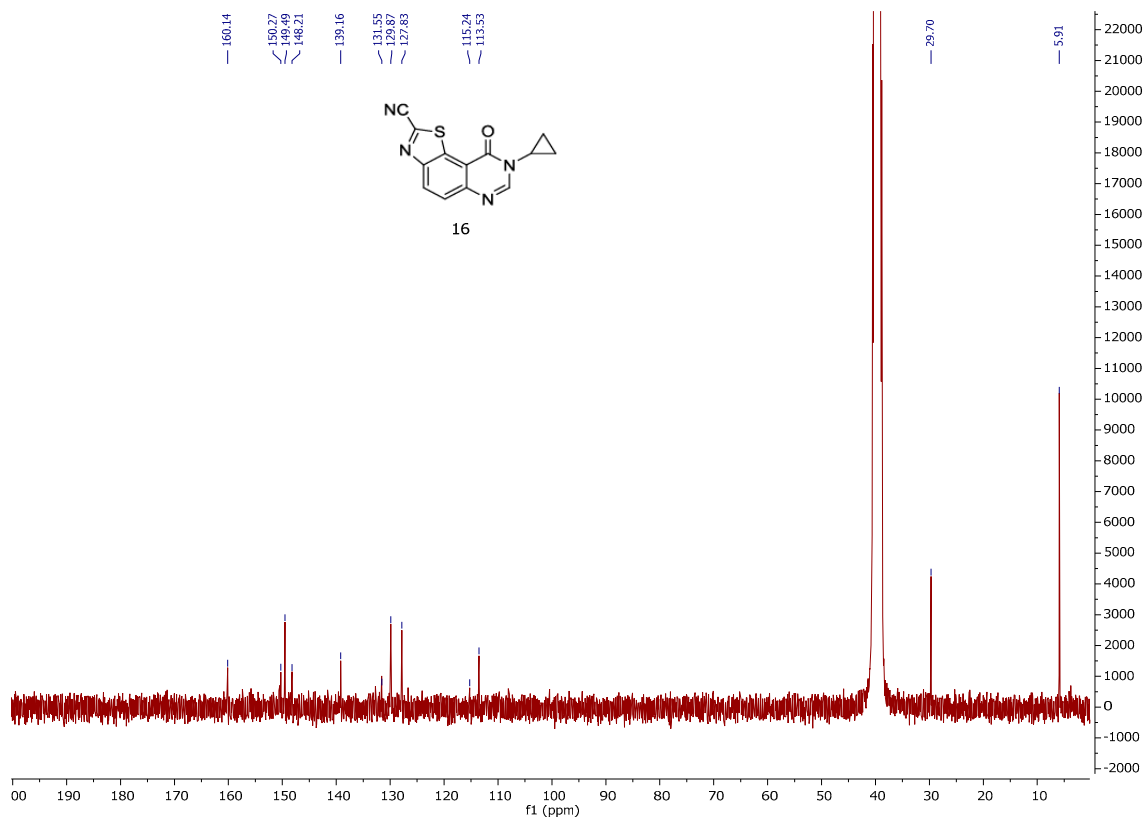

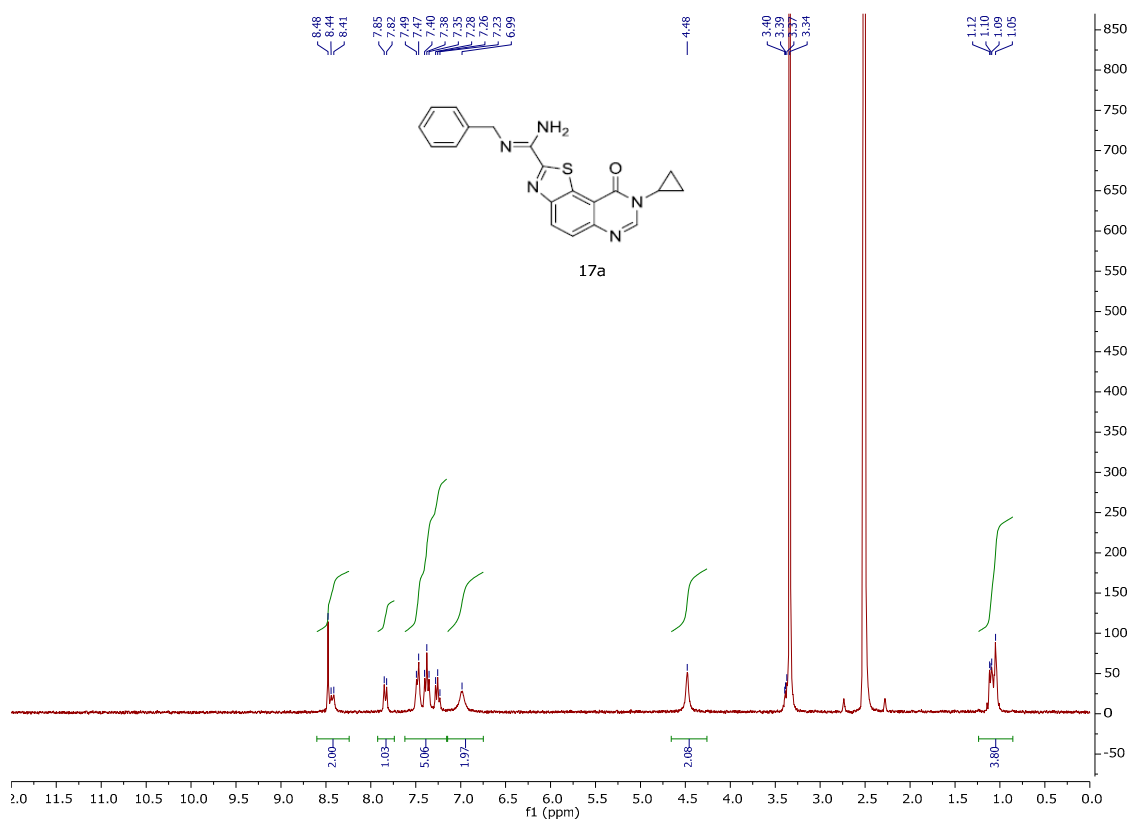Figure S45. <sup>1</sup>H-NMR and <sup>13</sup>C-NMR Compound 17a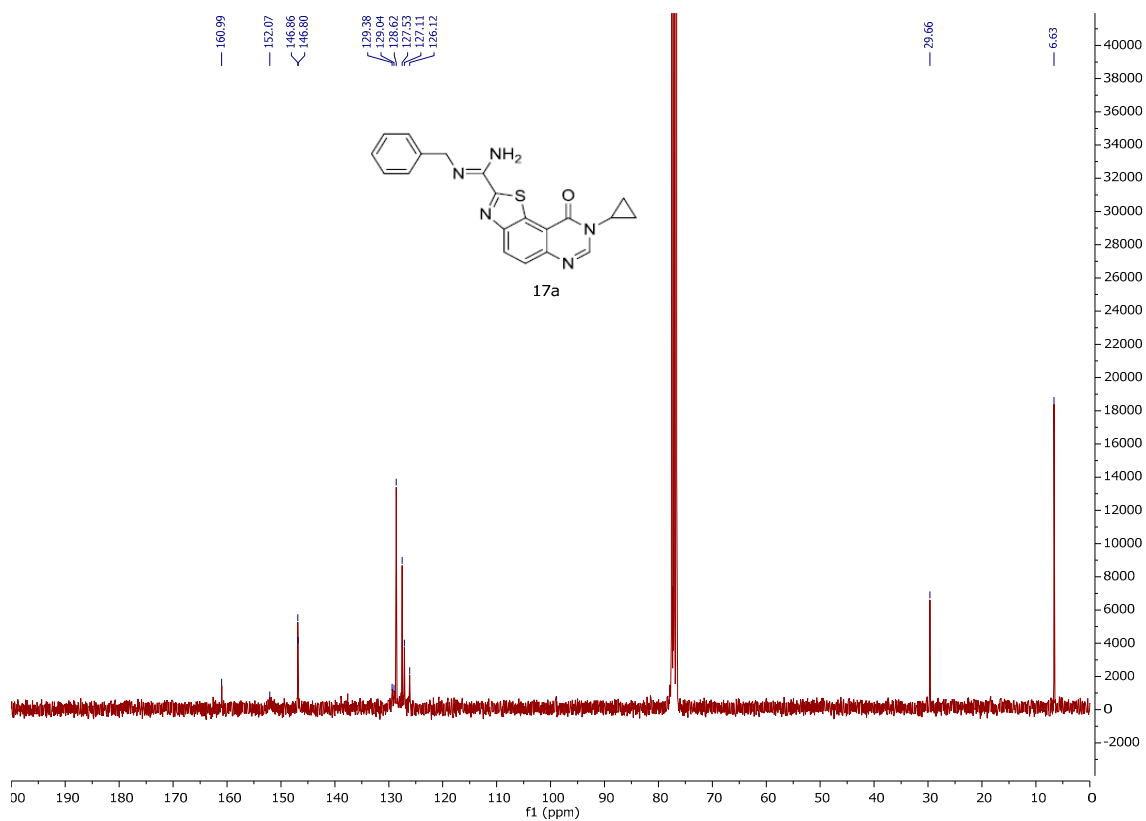

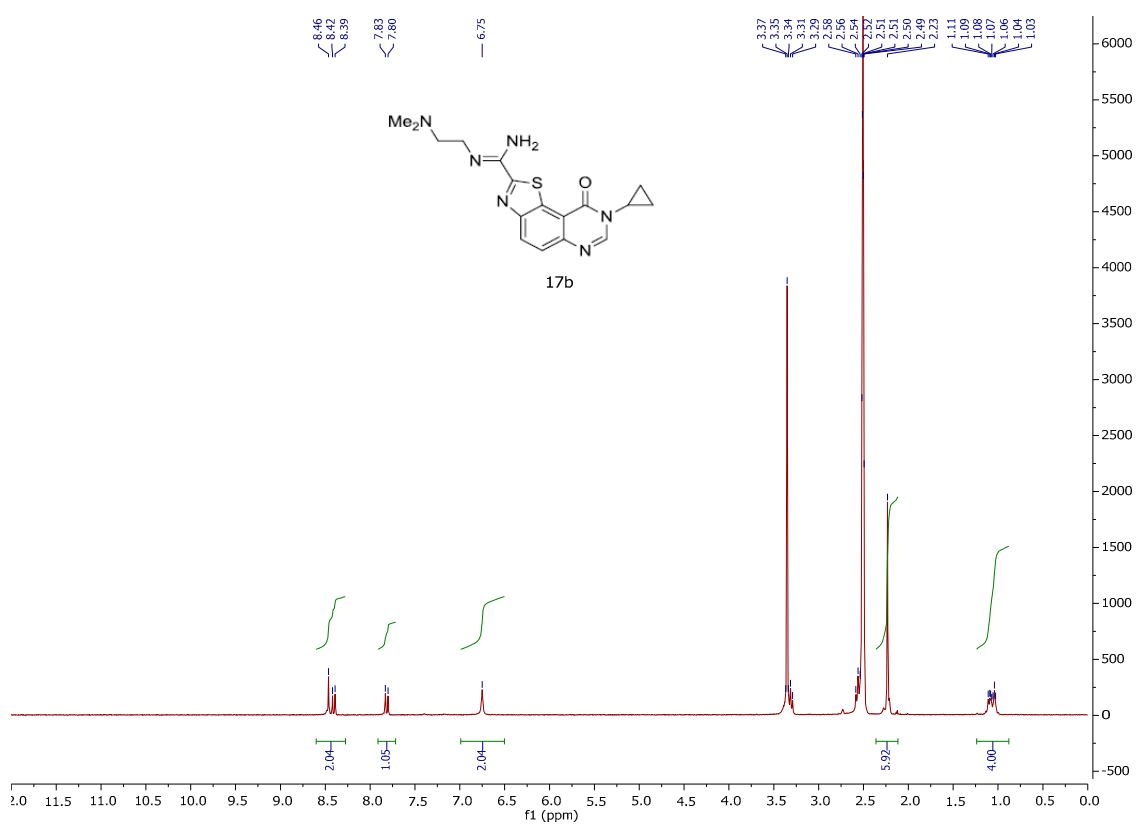

Figure S46.  $^1\text{H-NMR}$  and  $^{13}\text{C-NMR}$  Compound 17b

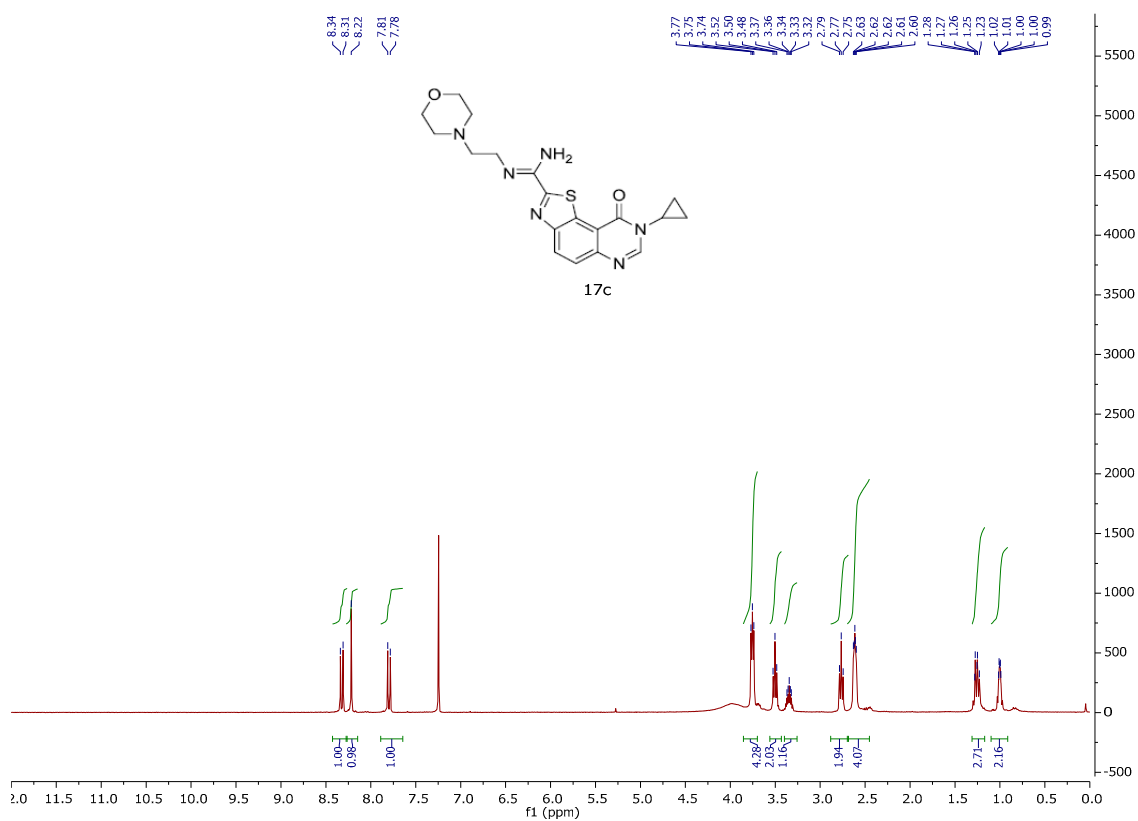Figure S47. <sup>1</sup>H-NMR and <sup>13</sup>C-NMR Compound 17c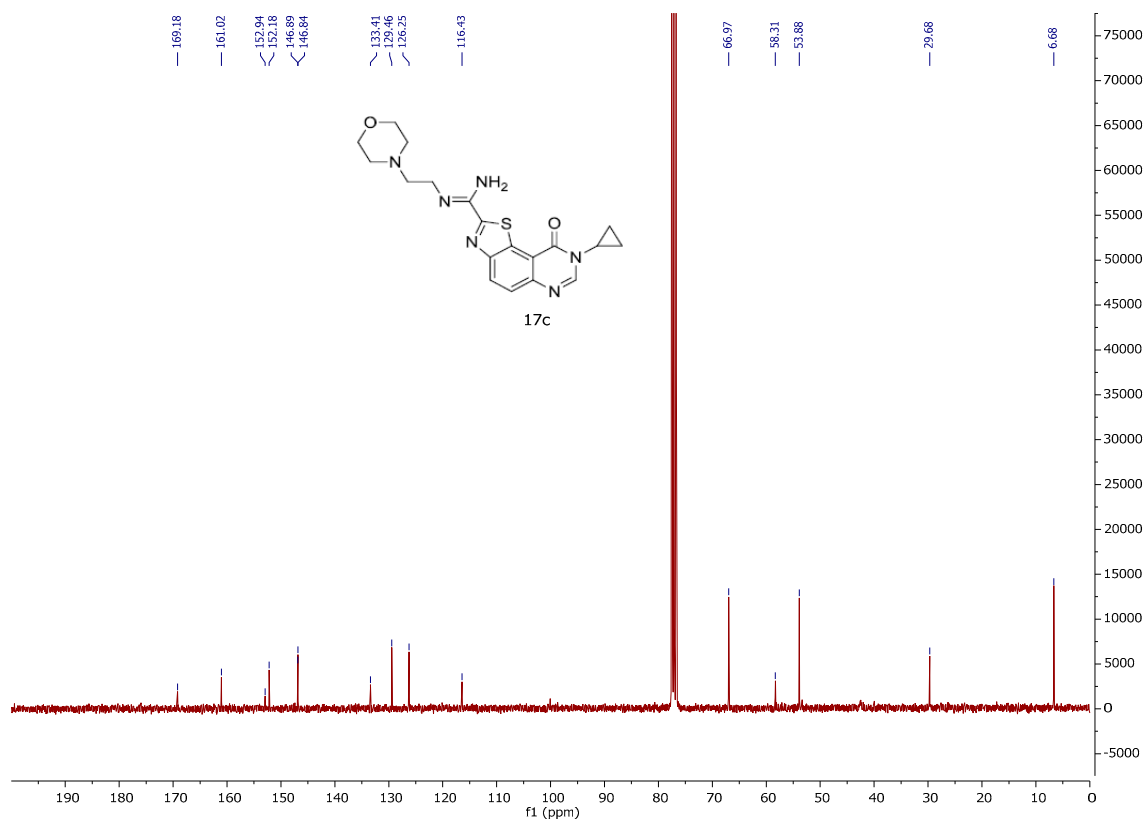

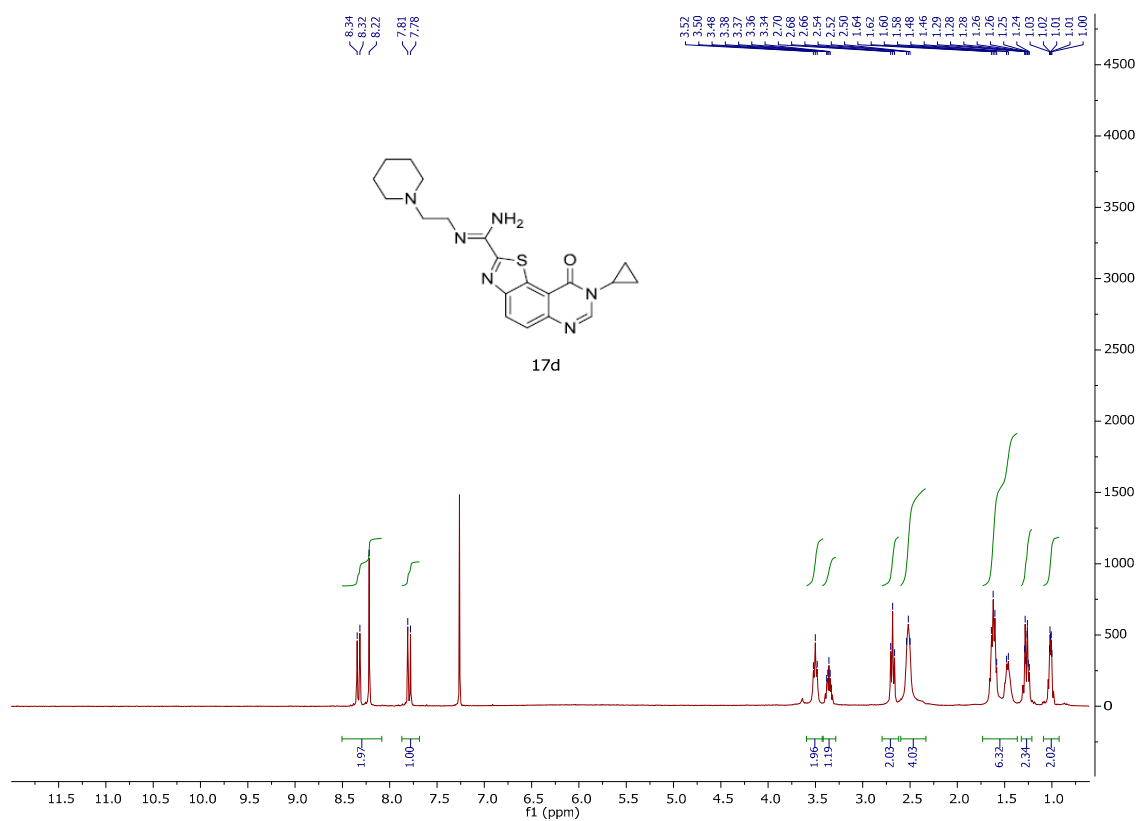Figure S48. <sup>1</sup>H-NMR and <sup>13</sup>C-NMR Compound 17d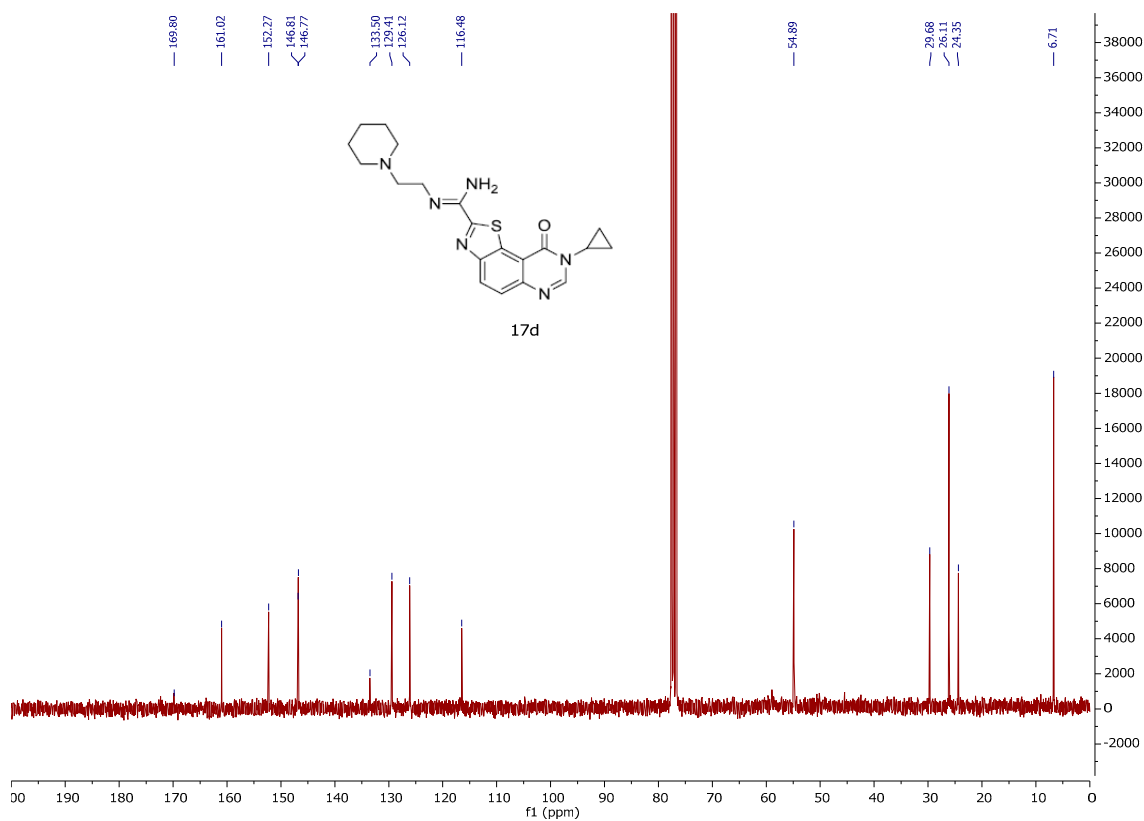

Supplement: molecules-21-00794-s001.pdf [file molecules-21-00794-s001.pdf]
